# Supplementary material for: Disaggregate level estimates and spatial mapping of food insecurity in Bangladesh by linking survey and census data
Source: PLoS One. 2020 Apr 10;15(4):e0230906. doi: 10.1371/journal.pone.0230906 (PMC7147775; doi:10.1371/journal.pone.0230906)
Supplement: S1 Data — (CSV) [file pone.0230906.s001.csv]

	lncal	hhsz	hage	nroom	rural	hempl	ihmstat3	ihmstat4	iownrent1	iownrent2	ihtype1	ihtype2	ihedlev1	ihedlev3	hhsz2	hhszrural	p1559yr	p60plusyr	p1to4yr	p0yr	pf1115atd	pm1115atd	div10	div30
1	7.824705793	8	54	4	1	1	0	0	1	0	0	0	1	0	11.9716	8	0.5	0	0.125	0	0	0	1	0
2	8.252769207	3	40	2	1	1	0	0	0	1	0	0	0	0	2.3716	3	1	0	0	0	0	0	1	0
3	7.744383564	6	47	3	1	0	0	0	0	1	0	0	0	0	2.1316	6	0.5	0.166666667	0	0.166666667	0	0.166666667	1	0
4	7.63399385	4	35	1	1	1	0	0	1	0	0	0	0	0	0.2916	4	0.5	0	0	0	0	0	1	0
5	8.216839168	2	24	1	1	1	0	0	1	0	0	0	1	0	6.4516	2	1	0	0	0	0	0	1	0
6	7.612712446	4	29	1	1	1	0	0	0	1	0	0	0	0	0.2916	4	0.5	0	0.25	0	0	0	1	0
7	7.772066165	5	45	1	1	1	0	0	0	1	0	0	0	0	0.2116	5	0.4	0	0.2	0	0	0.2	1	0
8	7.548108039	6	50	2	1	1	0	0	1	0	0	0	0	0	2.1316	6	0.333333333	0	0.333333333	0	0	0	1	0
9	8.343782217	1	74	2	1	0	1	0	1	0	0	0	1	0	12.5316	1	0	1	0	0	0	0	1	0
10	7.912679405	5	82	3	1	0	0	0	1	0	0	0	0	0	0.2116	5	0.6	0.4	0	0	0	0	1	0
11	8.337216882	3	61	3	1	0	0	0	1	0	0	0	1	0	2.3716	3	0.333333333	0.333333333	0	0	0	0	1	0
12	8.212421927	3	39	3	1	1	0	0	1	0	0	0	0	1	2.3716	3	0.666666667	0	0.333333333	0	0	0	1	0
13	7.433453752	6	42	1	1	1	0	0	1	0	0	0	0	0	2.1316	6	0.333333333	0	0.166666667	0	0	0	1	0
14	7.777369412	4	34	2	1	1	0	0	0	1	0	0	0	0	0.2916	4	0.5	0	0.5	0	0	0	1	0
15	7.782915635	1	52	1	1	1	1	0	1	0	0	0	0	0	12.5316	1	1	0	0	0	0	0	1	0
16	7.990380452	4	46	3	1	1	0	0	1	0	0	0	0	0	0.2916	4	0.5	0	0	0	0.25	0	1	0
17	7.914935525	4	39	3	1	1	0	0	1	0	0	0	0	0	0.2916	4	0.5	0	0	0	0.25	0.25	1	0
18	8.139064028	4	58	3	1	0	1	0	1	0	0	0	1	0	0.2916	4	0.5	0	0.25	0	0	0	1	0
19	7.794819034	4	36	2	1	1	0	0	1	0	0	0	0	0	0.2916	4	0.5	0	0	0	0.25	0	1	0
20	8.652222212	2	90	3	1	0	0	0	1	0	0	0	1	0	6.4516	2	0.5	0.5	0	0	0	0	1	0
21	7.699878639	8	76	5	1	0	0	0	1	0	0	1	0	0	11.9716	8	0.875	0.125	0	0	0	0	1	0
22	7.576917097	6	36	3	1	1	0	0	1	0	0	0	1	0	2.1316	6	0.5	0	0.166666667	0.166666667	0	0	1	0
23	7.589967894	7	65	2	1	1	0	0	0	1	0	0	0	0	6.0516	7	0.428571429	0.142857143	0.142857143	0	0	0	1	0
24	8.058137415	2	45	3	1	1	0	0	1	0	0	0	0	0	6.4516	2	1	0	0	0	0	0	1	0
25	7.461709355	4	33	2	1	1	0	0	1	0	0	0	0	0	0.2916	4	0.5	0	0	0	0	0	1	0
26	8.022257321	1	63	1	1	0	1	0	1	0	0	0	0	0	12.5316	1	0	1	0	0	0	0	1	0
27	7.954470582	5	67	2	1	1	0	0	1	0	0	0	1	0	0.2116	5	0.6	0.2	0.2	0	0	0	1	0
28	7.718836595	6	45	2	1	1	0	0	1	0	0	0	1	0	2.1316	6	0.333333333	0	0.166666667	0	0.166666667	0	1	0
29	7.595326945	1	79	1	1	0	1	0	1	0	0	0	1	0	12.5316	1	0	1	0	0	0	0	1	0
30	7.555565078	7	42	3	1	1	0	0	1	0	0	0	1	0	6.0516	7	0.285714286	0.142857143	0	0.142857143	0	0	1	0
31	7.78308234	4	34	2	1	1	0	0	1	0	0	0	0	0	0.2916	4	0.5	0	0.25	0	0	0	1	0
32	7.687153548	5	30	1	1	1	0	0	1	0	0	0	0	0	0.2116	5	0.4	0	0.4	0	0	0	1	0
33	7.5225138	7	45	2	1	1	0	0	1	0	0	0	0	0	6.0516	7	0.571428571	0	0.285714286	0	0	0	1	0
34	7.554795692	3	57	2	1	1	0	0	1	0	0	0	0	0	2.3716	3	0.666666667	0	0	0	0	0.333333333	1	0
35	7.750881593	4	54	3	1	1	0	0	1	0	0	0	0	0	0.2916	4	1	0	0	0	0	0	1	0
36	7.677757014	5	38	2	1	1	0	0	1	0	0	0	0	0	0.2116	5	0.6	0	0.2	0	0	0	1	0
37	8.00969868	2	24	1	1	1	0	0	1	0	0	0	0	0	6.4516	2	1	0	0	0	0	0	1	0
38	8.358171668	2	59	2	1	1	0	0	1	0	0	0	0	1	6.4516	2	1	0	0	0	0	0	1	0
39	7.102441741	7	58	2	1	0	1	0	1	0	0	0	0	0	6.0516	7	0.428571429	0	0.285714286	0.142857143	0	0	1	0
40	7.529750115	5	32	2	1	1	0	0	1	0	0	0	0	0	0.2116	5	0.4	0	0.2	0	0	0	1	0
41	7.954368761	3	31	2	1	1	0	0	1	0	1	0	0	0	2.3716	3	0.666666667	0	0.333333333	0	0	0	1	0
42	8.004859765	2	54	2	1	1	0	0	1	0	0	0	0	0	6.4516	2	1	0	0	0	0	0	1	0
43	7.678280081	4	44	3	1	1	0	0	1	0	0	0	0	0	0.2916	4	0.75	0	0	0	0.25	0	1	0
44	8.179140907	3	24	2	1	1	0	0	1	0	0	0	1	0	2.3716	3	1	0	0	0	0	0	1	0
45	7.664745426	5	34	1	1	1	0	0	1	0	0	0	0	0	0.2116	5	0.4	0	0.2	0	0	0	1	0
46	7.90238758	2	92	6	1	0	1	0	1	0	0	1	0	0	6.4516	2	0.5	0.5	0	0	0	0	1	0
47	7.75690143	3	29	3	1	1	0	0	1	0	0	0	0	1	2.3716	3	0.666666667	0.333333333	0	0	0	0	1	0
48	7.711611646	6	51	3	1	1	0	0	1	0	0	0	0	0	2.1316	6	0.666666667	0	0	0	0.166666667	0.166666667	1	0
49	7.834748534	7	61	4	1	1	0	0	1	0	0	0	0	1	6.0516	7	0.714285714	0.142857143	0.142857143	0	0	0	1	0
50	7.867442608	6	68	2	1	1	0	0	1	0	0	0	1	0	2.1316	6	0.333333333	0.166666667	0	0	0.166666667	0	1	0
51	7.661865848	3	39	1	1	1	0	0	1	0	0	0	0	0	2.3716	3	0.666666667	0	0.333333333	0	0	0	1	0
52	7.607957514	3	48	2	1	1	0	0	1	0	0	0	0	0	2.3716	3	0.666666667	0	0	0	0.333333333	0	1	0
53	7.944357403	2	79	1	1	0	0	0	1	0	0	0	0	0	6.4516	2	0	1	0	0	0	0	1	0
54	7.834194342	4	36	1	1	1	0	0	1	0	0	0	1	0	0.2916	4	0.5	0	0.25	0	0	0	1	0
55	7.58011795	7	60	2	1	1	0	0	1	0	0	0	0	0	6.0516	7	0.428571429	0.285714286	0	0	0.285714286	0	1	0
56	7.356707627	6	54	3	1	1	0	0	1	0	0	0	1	0	2.1316	6	0.333333333	0	0.166666667	0	0	0.166666667	1	0
57	8.05549101	3	24	3	1	1	0	0	1	0	0	0	0	0	2.3716	3	0.666666667	0.333333333	0	0	0	0	1	0
58	7.645364222	3	54	2	1	1	0	0	1	0	0	0	1	0	2.3716	3	0.666666667	0	0	0	0	0.333333333	1	0
59	7.699199085	6	59	2	1	1	0	0	1	0	0	0	0	0	2.1316	6	0.5	0.166666667	0	0	0	0	1	0
60	7.53859079	5	73	3	1	1	0	0	1	0	0	0	0	0	0.2116	5	0.6	0.2	0	0.2	0	0	1	0
61	7.77537244	3	51	3	1	0	1	0	1	0	0	0	0	1	2.3716	3	1	0	0	0	0	0	1	0
62	7.745500515	6	63	3	1	0	0	0	1	0	0	0	0	0	2.1316	6	0.333333333	0.166666667	0.166666667	0	0	0	1	0
63	7.470867803	5	52	2	1	1	0	0	1	0	0	0	0	0	0.2116	5	0.4	0	0.2	0	0	0.2	1	0
64	7.752867896	9	48	3	1	1	0	0	1	0	0	1	0	0	19.8916	9	0.444444444	0.111111111	0.111111111	0	0.111111111	0.111111111	1	0
65	7.499777406	6	43	3	1	1	0	0	1	0	0	0	0	0	2.1316	6	0.333333333	0	0.166666667	0	0.166666667	0	1	0
66	8.315776885	1	82	2	1	0	1	0	1	0	0	0	0	0	12.5316	1	0	1	0	0	0	0	1	0
67	8.235254594	1	58	2	1	0	0	0	1	0	0	0	1	0	12.5316	1	1	0	0	0	0	0	1	0
68	7.756747418	12	70	6	1	1	0	0	1	0	0	0	0	1	55.6516	12	0.5	0.25	0.25	0	0	0	1	0
69	7.569803872	4	41	3	1	0	0	0	1	0	0	0	0	0	0.2916	4	0.25	0	0	0	0.25	0.25	1	0
70	7.698355796	4	32	3	1	1	0	0	1	0	0	0	0	0	0.2916	4	0.5	0	0	0	0	0	1	0
71	7.748503164	5	46	4	1	1	0	0	1	0	0	0	0	1	0.2116	5	0.6	0	0	0	0	0	1	0
72	7.982563144	4	65	4	1	1	0	0	1	0	0	0	0	0	0.2916	4	0.75	0.25	0	0	0	0	1	0
73	7.684172262	3	56	3	1	1	0	0	1	0	0	0	0	0	2.3716	3	0.666666667	0	0	0	0.333333333	0	1	0
74	7.561095575	3	38	2	1	0	1	0	1	0	0	0	1	0	2.3716	3	1	0	0	0	0.333333333	0	1	0
75	7.62581456	5	32	2	1	1	0	0	1	0	0	0	1	0	0.2116	5	0.4	0.2	0	0	0	0	1	0
76	8.268088035	1	68	3	1	0	1	0	1	0	0	0	0	0	12.5316	1	0	1	0	0	0	0	1	0
77	7.426989452	6	28	2	1	1	0	0	1	0	0	0	1	0	2.1316	6	0.166666667	0	0.166666667	0	0	0.333333333	1	0
78	7.6172383	6	48	4	1	1	0	0	1	0	0	0	0	1	2.1316	6	0.5	0	0.333333333	0	0.166666667	0	1	0
79	8.052325152	3	28	3	1	1	0	0	1	0	0	0	0	0	2.3716	3	1	0	0	0	0	0	1	0
80	7.971040863	3	49	3	1	1	0	0	1	0	0	0	0	0	2.3716	3	1	0	0	0	0	0	1	0
81	7.6087863	5	46	3	1	1	0	0	1	0	0	0	1	0	0.2116	5	0.4	0	0.4	0	0	0.2	1	0
82	7.886479819	5	56	5	1	1	0	0	1	0	0	0	0	0	0.2116	5	0.6	0.2	0	0	0	0.2	1	0
83	7.744478857	5	45	3	1	0	0	0	1	0	0	0	0	0	0.2116	5	0.4	0.2	0	0	0	0.2	1	0
84	7.840128	7	51	3	1	1	0	0	1	0	0	0	1	0	6.0516	7	0.857142857	0	0.142857143	0	0	0	1	0
85	8.035631828	2	62	2	1	1	0	0	1	0	0	0	0	0	6.4516	2	0.5	0.5	0	0	0	0	1	0
86	7.940249132	3	32	4	1	1	0	0	1	0	0	0	0	0	2.3716	3	0.666666667	0	0.333333333	0	0	0	1	0
87	7.681551137	5	36	3	1	1	0	0	1	0	0	0	0	0	0.2116	5	0.4	0	0.2	0	0.2	0	1	0
88	7.747018087	2	82	2	1	0	0	0	1	0	0	0	1	0	6.4516	2	0	1	0	0	0	0	1	0
89	7.670643051	5	38	2	1	1	0	0	1	0	0	0	0	0	0.2116	5	0.6	0	0.2	0	0	0	1	0
90	7.8832918	3	26	3	1	1	0	0	1	0	0	0	0	0	2.3716	3	0.666666667	0	0.333333333	0	0	0	1	0
91	7.781697852	7	62	3	1	1	0	0	1	0	0	0	0	1	6.0516	7	0.571428571	0.142857143	0.142857143	0.142857143	0	0	1	0
92	7.513720159	5	44	3	1	1	0	0	1	0	0	0	0	0	0.2116	5	0.6	0	0	0	0	0	1	0
93	7.664998695	6	37	4	1	1	0	0	1	0	0	0	1	0	2.1316	6	0.5	0.166666667	0.166666667	0	0	0	1	0
94	7.673199865	4	56	7	1	1	0	0	1	0	0	0	0	1	0.2916	4	0.75	0.25	0	0	0	0	1	0
95	7.738231009	5	41	2	1	1	0	0	1	0	0	0	1	0	0.2116	5	0.6	0	0.2	0	0.2	0	1	0
96	7.98322517	4	46	3	1	1	0	0	1	0	0	0	1	0	0.2916	4	0.75	0	0	0	0.25	0	1	0
97	7.871040278	6	48	3	1	1	0	0	1	0	0	0	0	0	2.1316	6	0.666666667	0	0	0	0	0	1	0
98	7.47325657	5	33	4	1	1	0	0	1	0	0	0	0	0	0.2116	5	0.4	0.2	0.2	0	0	0	1	0
99	8.049117303	1	46	6	1	0	0	0	1	0	0	0	0	0	12.5316	1	1	0	0	0	0	0	1	0
100	7.855114353	3	72	6	1	0	0	0	1	0	0	0	1	0	2.3716	3	0.333333333	0.666666667	0	0	0	0	1	0
101	7.895864221	3	45	1	0	1	0	0	0	1	0	0	0	1	2.3716	0	0.666666667	0	0	0	0	0	1	0
102	7.760258141	7	58	3	0	1	0	0	1	0	0	0	0	0	6.0516	0	1	0	0	0	0	0	1	0
103	7.868854927	5	60	4	0	1	0	0	1	0	0	1	0	1	0.2116	0	0.6	0.2	0	0.2	0	0	1	0
104	7.454870401	5	70	2	0	0	0	0	1	0	0	0	0	0	0.2116	0	0.4	0.4	0.2	0	0	0	1	0
105	7.673097532	3	45	1	0	1	0	0	0	1	0	0	1	0	2.3716	0	0.666666667	0	0	0	0	0.333333333	1	0
106	7.871009746	5	34	3	0	1	0	0	1	0	0	0	0	1	0.2116	0	0.6	0	0.2	0	0.4	0	1	0
107	7.95670102	3	43	4	0	0	1	0	1	0	0	0	1	0	2.3716	0	1	0	0	0	0	0	1	0
108	7.79394138	3	25	2	0	1	0	0	0	1	0	0	0	0	2.3716	0	0.666666667	0	0.333333333	0	0	0	1	0
109	7.52063556	5	66	3	0	0	0	0	1	0	0	0	0	1	0.2116	0	0.6	0.2	0	0	0	0	1	0
110	7.442539588	5	45	2	0	1	0	0	1	0	0	0	0	1	0.2116	0	0.6	0.2	0	0	0	0	1	0
111	7.465409144	7	60	8	0	1	0	0	1	0	0	1	0	1	6.0516	0	0.428571429	0.142857143	0	0.142857143	0	0.142857143	1	0
112	7.75206869	2	56	6	0	1	0	0	1	0	0	1	0	1	6.4516	0	1	0	0	0	0	0	1	0
113	7.191150677	4	65	1	0	0	1	0	0	0	0	0	0	0	0.2916	0	0.5	0.25	0.25	0	0	0	1	0
114	7.215350267	4	32	1	0	1	0	0	1	0	0	0	0	1	0.2916	0	0.5	0	0.25	0	0	0	1	0
115	7.673018449	5	62	3	0	1	0	0	1	0	0	1	0	1	0.2116	0	0.2	0.4	0	0	0	0.2	1	0
116	7.414910174	4	50	2	0	1	0	0	1	0	0	0	0	1	0.2916	0	1	0	0	0	0	0	1	0
117	7.44789113	4	40	1	0	1	0	0	1	0	0	1	0	1	0.2916	0	0.5	0	0	0	0	0	1	0
118	7.254948412	6	35	4	0	1	0	0	1	0	0	1	0	0	2.1316	0	0.666666667	0	0	0	0.166666667	0	1	0
119	7.688670633	5	50	2	0	1	0	0	1	0	0	0	0	1	0.2116	0	1	0	0	0	0	0	1	0
120	7.561329684	5	43	2	0	1	0	0	1	0	0	0	0	1	0.2116	0	0.6	0	0	0	0	0.2	1	0
121	7.484739361	3	41	2	0	1	0	0	1	0	1	0	0	1	2.3716	0	0.666666667	0	0	0	0	0	1	0
122	7.716919492	4	43	3	0	1	0	0	0	1	0	1	0	1	0.2916	0	0.5	0.25	0	0	0	0	1	0
123	7.835298464	4	44	2	0	1	0	0	1	0	0	0	0	1	0.2916	0	0.5	0	0	0	0	0.25	1	0
124	7.74753207	3	45	3	0	1	0	0	1	0	0	0	0	1	2.3716	0	1	0	0	0	0	0	1	0
125	7.743945968	4	46	5	0	1	0	0	0	1	1	0	0	1	0.2916	0	0.75	0	0	0	0	0.25	1	0
126	7.485800202	8	55	5	0	1	0	0	0	1	0	0	0	0	11.9716	0	0.875	0	0	0	0	0	1	0
127	7.635071975	3	60	2	0	1	1	0	0	1	0	0	0	1	2.3716	0	0.666666667	0.333333333	0	0	0	0	1	0
128	7.769674299	2	55	6	0	1	1	0	1	0	0	0	0	1	6.4516	0	1	0	0	0	0	0	1	0
129	7.48665255	4	45	2	0	1	0	0	1	0	1	0	0	1	0.2916	0	0.5	0	0	0	0.25	0	1	0
130	7.586666609	9	70	6	0	0	0	0	1	0	1	0	0	1	19.8916	0	0.555555556	0.222222222	0.222222222	0	0	0	1	0
131	8.033917882	4	50	4	0	1	0	0	1	0	1	0	0	1	0.2916	0	0.75	0	0	0	0	0	1	0
132	7.309734318	9	72	4	0	1	0	0	1	0	0	0	0	0	19.8916	0	0.555555556	0.222222222	0	0	0.111111111	0	1	0
133	7.962837047	6	65	7	0	0	0	0	1	0	0	0	0	1	2.1316	0	0.833333333	0.166666667	0	0	0	0.166666667	1	0
134	7.708213073	4	40	2	0	1	0	0	0	1	0	0	0	0	0.2916	0	0.5	0	0	0.25	0	0	1	0
135	7.945410182	5	49	5	0	1	0	0	1	0	0	0	0	1	0.2116	0	0.6	0	0	0	0	0.2	1	0
136	7.842502635	4	54	4	0	0	0	0	0	1	0	0	0	1	0.2916	0	1	0	0	0	0	0	1	0
137	7.736848435	4	35	3	0	0	0	0	0	1	0	0	0	0	0.2916	0	0.5	0	0.25	0	0	0	1	0
138	7.698564417	4	41	2	0	1	0	0	1	0	0	0	1	0	0.2916	0	0.5	0	0.25	0	0	0	1	0
139	8.098797847	4	60	4	0	0	0	0	1	0	0	0	0	0	0.2916	0	0.75	0.25	0	0	0	0	1	0
140	8.025954485	4	40	9	0	1	0	0	1	0	0	1	0	1	0.2916	0	0.75	0	0	0	0	0	1	0
141	7.686258718	6	40	5	0	1	0	0	1	0	0	0	0	0	2.1316	0	0.333333333	0.333333333	0.166666667	0	0	0.166666667	1	0
142	8.155746883	3	74	4	0	0	0	0	1	0	0	0	0	1	2.3716	0	0.666666667	0.333333333	0	0	0	0	1	0
143	7.596005489	4	31	2	0	1	0	0	1	0	0	0	1	0	0.2916	0	0.5	0	0	0	0	0	1	0
144	7.842172725	5	46	3	0	1	0	0	1	0	0	0	1	0	0.2116	0	0.4	0	0	0	0	0.4	1	0
145	7.70002355	4	28	1	0	1	0	0	1	0	0	0	0	0	0.2916	0	0.5	0	0	0	0	0	1	0
146	7.639719245	3	27	2	0	1	0	0	1	0	0	0	0	0	2.3716	0	0.666666667	0	0.333333333	0	0	0	1	0
147	7.730469128	6	26	3	0	1	0	0	1	0	0	0	0	0	2.1316	0	0.333333333	0.333333333	0.166666667	0	0	0	1	0
148	7.621650718	5	34	4	0	1	0	0	1	0	0	0	0	0	0.2116	0	0.4	0.2	0.2	0	0	0	1	0
149	7.913118595	4	59	4	0	1	0	0	1	0	0	0	0	0	0.2916	0	0.75	0	0	0	0.25	0	1	0
150	7.732193845	3	59	3	0	1	0	0	1	0	0	0	1	0	2.3716	0	0.666666667	0	0	0	0	0	1	0
151	7.607634747	8	49	2	0	1	0	0	1	0	0	0	1	0	11.9716	0	0.25	0.125	0.125	0	0	0.125	1	0
152	7.814137079	4	40	3	0	1	0	0	1	0	0	0	1	0	0.2916	0	0.5	0	0.25	0	0	0	1	0
153	7.419290651	3	35	3	0	0	0	0	1	0	1	0	0	0	2.3716	0	0.333333333	0	0	0	0.333333333	0.333333333	1	0
154	7.600027077	5	31	3	0	0	0	0	0	1	0	1	1	0	0.2116	0	0.2	0	0.2	0	0.2	0	1	0
155	7.979321772	3	49	8	0	1	0	0	1	0	0	0	0	1	2.3716	0	0.666666667	0	0	0	0	0.333333333	1	0
156	7.831533906	3	30	1	0	1	0	0	1	0	0	0	0	1	2.3716	0	0.666666667	0	0	0	0	0	1	0
157	7.886276871	4	42	3	0	1	0	0	1	0	1	0	0	1	0.2916	0	0.5	0	0	0	0	0.25	1	0
158	7.669532599	5	39	2	0	1	0	0	1	0	0	0	0	0	0.2116	0	0.4	0.2	0.2	0	0	0	1	0
159	7.72639349	7	62	4	0	0	0	0	1	0	0	0	1	0	6.0516	0	0.428571429	0.142857143	0.142857143	0.142857143	0	0	1	0
160	7.746806371	1	62	3	0	0	1	0	1	0	0	0	0	0	12.5316	0	0	1	0	0	0	0	1	0
161	7.555706329	3	23	2	1	1	0	0	1	0	0	0	0	0	2.3716	3	0.666666667	0	0.333333333	0	0	0	1	0
162	7.986212478	6	45	3	1	1	0	0	1	0	0	0	0	1	2.1316	6	0.666666667	0	0	0	0.166666667	0	1	0
163	7.948491249	4	44	4	1	1	0	0	1	0	1	0	0	1	0.2916	4	0.75	0.25	0	0	0	0	1	0
164	7.727887471	6	25	4	1	1	0	0	1	0	0	0	0	0	2.1316	6	0.833333333	0	0.166666667	0	0	0	1	0
165	7.24811993	4	31	1	1	1	0	0	0	0	0	0	0	0	0.2916	4	0.5	0	0.25	0	0	0	1	0
166	7.73679606	5	42	2	1	1	0	0	1	0	0	0	0	0	0.2116	5	0.6	0	0	0	0.4	0	1	0
167	7.831371117	5	33	1	1	1	0	0	0	0	0	0	0	0	0.2116	5	0.4	0	0.4	0	0	0	1	0
168	7.704050028	4	31	1	1	1	0	0	1	0	1	0	0	0	0.2916	4	0.5	0	0.25	0	0	0	1	0
169	7.507102639	5	38	2	1	1	0	0	1	0	0	0	0	0	0.2116	5	0.4	0	0.2	0	0	0	1	0
170	8.033587066	7	33	4	1	1	0	0	1	0	0	0	0	0	6.0516	7	0.714285714	0	0.142857143	0.142857143	0	0	1	0
171	7.864754079	2	52	2	1	1	0	0	1	0	0	0	0	0	6.4516	2	1	0	0	0	0	0	1	0
172	7.931202113	7	37	2	1	1	0	0	1	0	0	0	0	0	6.0516	7	0.571428571	0.142857143	0.142857143	0	0	0	1	0
173	7.712367803	8	70	4	1	1	0	0	1	0	0	0	0	0	11.9716	8	0.5	0.125	0	0	0	0.125	1	0
174	7.613082975	5	39	4	1	1	0	0	1	0	0	0	0	1	0.2116	5	0.4	0	0	0	0	0.4	1	0
175	8.00236624	7	61	4	1	1	0	0	1	0	0	0	0	0	6.0516	7	0.857142857	0.142857143	0	0	0.142857143	0	1	0
176	8.034083248	4	45	1	1	1	0	0	1	0	0	0	0	0	0.2916	4	1	0	0	0	0	0	1	0
177	7.652156253	3	44	1	1	1	1	0	1	0	0	0	0	0	2.3716	3	0.666666667	0	0	0	0	0	1	0
178	7.497639742	6	23	1	1	1	0	0	1	0	0	0	0	0	2.1316	6	1	0	0	0	0	0	1	0
179	8.049251435	3	37	1	1	1	0	0	1	0	0	0	0	0	2.3716	3	0.666666667	0	0	0	0	0	1	0
180	8.013875976	7	73	4	1	1	0	0	1	0	0	0	1	0	6.0516	7	0.714285714	0.285714286	0	0	0	0	1	0
181	7.682556177	8	54	4	1	1	0	0	0	1	0	0	1	0	11.9716	8	0.5	0	0.25	0	0	0.125	1	0
182	7.600487373	3	33	2	1	1	0	0	1	0	0	0	0	1	2.3716	3	0.666666667	0	0	0	0	0	1	0
183	7.280979525	5	65	3	1	0	0	0	1	0	0	0	0	0	0.2116	5	0.6	0.2	0.2	0	0	0	1	0
184	7.278318335	5	52	3	1	1	0	0	1	0	0	0	0	1	0.2116	5	0.6	0	0	0	0.2	0	1	0
185	7.296487842	5	39	2	1	1	0	0	0	1	0	0	0	1	0.2116	5	0.4	0	0.2	0.2	0	0	1	0
186	7.684227467	3	42	3	1	0	0	0	1	0	0	0	0	0	2.3716	3	1	0	0	0	0	0	1	0
187	7.580924217	4	38	3	1	1	0	0	1	0	0	1	0	1	0.2916	4	0.5	0	0.25	0	0	0	1	0
188	8.202128959	4	45	3	1	0	0	0	1	0	0	0	1	0	0.2916	4	0.75	0	0	0	0	0	1	0
189	7.661597667	4	54	6	1	1	0	0	1	0	0	0	0	1	0.2916	4	0.5	0.25	0	0	0	0.25	1	0
190	7.705775857	3	66	4	1	1	0	0	1	0	0	0	0	0	2.3716	3	0.666666667	0.333333333	0	0	0.333333333	0	1	0
191	7.804545098	1	68	2	1	0	1	0	1	0	0	0	0	0	12.5316	1	0	1	0	0	0	0	1	0
192	7.742184984	5	28	4	1	1	0	0	1	0	0	0	0	0	0.2116	5	0.8	0.2	0	0	0	0	1	0
193	7.441296929	4	42	3	1	1	0	0	1	0	0	0	1	0	0.2916	4	0.5	0	0	0	0	0	1	0
194	7.827655489	4	62	3	1	1	0	0	1	0	0	0	1	0	0.2916	4	0.5	0.25	0	0	0	0.25	1	0
195	7.122794075	5	49	4	1	1	0	0	1	0	0	0	0	0	0.2116	5	0.4	0	0	0	0.2	0	1	0
196	7.447424886	7	37	4	1	1	0	0	1	0	0	0	0	0	6.0516	7	0.714285714	0	0.142857143	0	0	0	1	0
197	7.458434108	4	32	2	1	1	0	0	1	0	0	0	0	0	0.2916	4	0.5	0	0.25	0	0	0	1	0
198	7.583522296	6	51	2	1	1	0	0	1	0	0	0	1	0	2.1316	6	0.666666667	0	0.333333333	0	0	0	1	0
199	7.390483852	5	41	2	1	1	0	0	1	0	0	0	0	0	0.2116	5	0.6	0	0	0	0	0.2	1	0
200	7.378845817	8	47	4	1	1	0	0	1	0	0	0	0	0	11.9716	8	0.375	0.125	0	0	0.125	0.125	1	0
201	7.522773336	5	31	1	1	1	0	0	1	0	0	0	0	0	0.2116	5	0.4	0	0.2	0	0	0	1	0
202	7.665134684	3	48	2	1	0	1	0	1	0	0	0	0	0	2.3716	3	1	0	0	0	0	0	1	0
203	7.71991141	4	29	3	1	1	0	0	1	0	0	0	0	0	0.2916	4	0.5	0.25	0	0	0	0	1	0
204	7.519356122	5	26	3	1	1	0	0	1	0	0	0	0	0	0.2116	5	0.4	0.2	0.2	0	0	0	1	0
205	7.505987202	6	50	3	1	1	0	0	1	0	0	0	1	0	2.1316	6	0.666666667	0	0	0	0	0.333333333	1	0
206	7.46670799	5	33	1	1	1	0	0	1	0	0	0	0	0	0.2116	5	0.4	0.2	0.2	0	0	0	1	0
207	7.784772816	6	50	5	1	1	0	0	1	0	0	0	1	0	2.1316	6	0.5	0.166666667	0	0	0.166666667	0.166666667	1	0
208	7.065767067	1	77	1	1	0	1	0	1	0	0	0	0	0	12.5316	1	0	1	0	0	0	0	1	0
209	7.34363966	5	52	3	1	1	0	0	1	0	0	0	0	1	0.2116	5	0.8	0	0	0	0	0	1	0
210	7.687410376	4	39	2	1	0	1	0	1	0	0	1	0	0	0.2916	4	0.75	0	0	0.25	0	0	1	0
211	7.870666203	5	56	4	1	1	0	0	1	0	0	0	0	1	0.2116	5	0.8	0	0.2	0	0	0	1	0
212	7.497096291	6	44	3	1	1	0	0	1	0	0	0	0	0	2.1316	6	0.5	0	0	0	0.333333333	0.166666667	1	0
213	7.454951404	5	47	2	1	1	0	0	1	0	0	0	0	0	0.2116	5	0.4	0	0	0	0	0.2	1	0
214	7.18624271	2	26	2	1	1	0	0	1	0	0	0	0	1	6.4516	2	1	0	0	0	0	0	1	0
215	7.388760666	6	65	2	1	1	0	0	1	0	0	0	0	0	2.1316	6	0.333333333	0.166666667	0	0	0	0	1	0
216	7.479903634	6	39	3	1	1	0	0	1	0	0	0	0	0	2.1316	6	0.333333333	0.166666667	0.166666667	0	0.166666667	0	1	0
217	7.647480655	3	45	2	1	1	0	0	1	0	0	0	1	0	2.3716	3	0.666666667	0	0	0	0	0	1	0
218	7.713199363	4	42	4	1	1	0	0	1	0	0	0	0	1	0.2916	4	0.75	0	0	0	0	0.25	1	0
219	7.719094301	3	52	3	1	1	0	0	1	0	0	0	0	0	2.3716	3	1	0	0	0	0	0	1	0
220	7.544104569	3	72	2	1	1	0	0	1	0	0	0	0	0	2.3716	3	0	1	0	0	0	0	1	0
221	7.757089636	3	32	4	1	0	0	0	1	0	0	0	0	0	2.3716	3	0.333333333	0	0	0	0	0.666666667	1	0
222	7.769969901	3	49	5	1	1	0	0	1	0	0	0	0	0	2.3716	3	0.666666667	0.333333333	0	0	0	0	1	0
223	7.509022888	2	50	2	1	0	1	0	1	0	0	0	0	0	6.4516	2	1	0	0	0	0	0	1	0
224	7.345848907	6	31	3	1	0	0	0	1	0	0	0	0	0	2.1316	6	0.333333333	0	0	0	0.333333333	0	1	0
225	7.401670728	4	35	2	1	1	0	0	1	0	0	0	0	0	0.2916	4	0.5	0	0.25	0	0	0	1	0
226	7.505299737	6	40	2	1	1	0	0	1	0	0	0	0	0	2.1316	6	0.333333333	0.166666667	0	0	0	0	1	0
227	7.059720716	7	48	4	1	1	0	0	1	0	0	0	0	0	6.0516	7	0.428571429	0.142857143	0	0	0	0	1	0
228	7.716376164	3	57	4	1	1	0	0	1	0	0	1	0	1	2.3716	3	1	0	0	0	0	0.333333333	1	0
229	7.448246495	6	55	3	1	1	0	0	1	0	0	0	0	0	2.1316	6	0.666666667	0	0	0	0.166666667	0	1	0
230	7.376802201	7	68	2	1	0	0	0	1	0	0	0	1	0	6.0516	7	0.428571429	0.142857143	0	0	0.142857143	0	1	0
231	7.579167967	7	47	3	1	1	0	0	1	0	0	0	0	1	6.0516	7	0.428571429	0.142857143	0	0	0.142857143	0	1	0
232	7.663689448	5	67	3	1	1	1	0	1	0	0	0	1	0	0.2116	5	0.4	0.2	0.2	0	0	0.2	1	0
233	7.646578255	5	64	3	1	1	0	0	1	0	0	0	1	0	0.2116	5	0.6	0.2	0	0	0	0	1	0
234	7.855967069	4	54	3	1	1	0	0	1	0	1	0	0	1	0.2916	4	1	0	0	0	0	0	1	0
235	7.981787949	2	25	2	1	1	0	0	0	1	0	0	0	0	6.4516	2	1	0	0	0	0	0	1	0
236	7.496435989	2	54	1	1	0	1	0	1	0	0	0	0	0	6.4516	2	0.5	0	0	0	0	0	1	0
237	7.373719511	2	52	3	1	0	1	0	1	0	0	0	1	0	6.4516	2	1	0	0	0	0	0	1	0
238	7.673078925	6	40	3	1	0	0	0	1	0	0	0	0	0	2.1316	6	0.5	0	0.166666667	0	0.333333333	0	1	0
239	7.550187945	3	99	3	1	1	0	0	1	0	0	0	1	0	2.3716	3	0	0.666666667	0	0	0	0	1	0
240	7.755077425	4	44	2	1	1	0	0	1	0	0	0	0	0	0.2916	4	0.5	0	0.25	0	0	0	1	0
241	7.38400188	3	45	3	1	1	0	0	1	0	0	0	0	1	2.3716	3	1	0	0	0	0	0	1	0
242	7.641309968	3	33	2	1	1	0	0	0	1	0	1	0	1	2.3716	3	0.666666667	0	0	0	0	0	1	0
243	7.619626074	6	61	3	1	0	0	0	0	1	0	1	0	1	2.1316	6	0.5	0.166666667	0.166666667	0	0.166666667	0	1	0
244	7.634844844	5	47	4	1	1	0	0	1	0	1	0	0	1	0.2116	5	0.4	0	0	0	0	0.2	1	0
245	7.564891789	3	35	3	1	1	0	0	0	1	1	0	0	1	2.3716	3	0.666666667	0	0	0	0	0	1	0
246	7.798453293	4	51	4	1	1	0	0	1	0	0	1	0	1	0.2916	4	0.75	0	0	0	0	0	1	0
247	7.120403951	5	53	2	1	1	0	0	0	1	0	0	0	0	0.2116	5	0.4	0	0.2	0	0	0	1	0
248	7.444757292	4	70	1	1	1	0	0	0	1	0	0	1	0	0.2916	4	0.25	0.5	0	0	0.25	0	1	0
249	7.518064181	4	42	1	1	1	0	0	1	0	0	1	0	1	0.2916	4	0.5	0	0	0	0	0.25	1	0
250	7.581077232	4	47	2	1	0	1	0	1	0	0	0	0	0	0.2916	4	0.75	0	0	0	0.25	0	1	0
251	7.667775753	5	35	2	1	0	0	0	0	1	0	1	1	0	0.2116	5	0.4	0	0	0	0.2	0	1	0
252	7.802581283	6	61	3	1	0	1	0	1	0	0	0	1	0	2.1316	6	0.5	0.166666667	0	0	0	0	1	0
253	7.79604152	1	63	2	1	1	1	0	0	1	0	0	0	0	12.5316	1	0	1	0	0	0	0	1	0
254	7.461094266	3	26	1	1	1	0	0	1	0	0	0	0	0	2.3716	3	0.666666667	0	0.333333333	0	0	0	1	0
255	7.337223331	1	56	1	1	1	1	0	0	1	0	0	0	0	12.5316	1	1	0	0	0	0	0	1	0
256	7.651904462	5	49	3	1	1	0	0	1	0	0	1	0	1	0.2116	5	1	0	0	0	0	0	1	0
257	7.408009219	2	69	2	1	1	0	0	1	0	0	0	0	0	6.4516	2	0	1	0	0	0	0	1	0
258	8.065805603	2	43	4	1	0	0	0	1	0	1	0	0	1	6.4516	2	1	0	0	0	0	0	1	0
259	7.77803558	3	60	3	1	1	0	0	1	0	1	0	0	1	2.3716	3	0.666666667	0.333333333	0	0	0	0	1	0
260	7.568182968	7	63	4	1	1	0	0	1	0	0	1	1	0	6.0516	7	0.428571429	0.142857143	0.142857143	0	0	0.142857143	1	0
261	7.916997046	3	46	5	1	1	0	0	1	0	0	0	1	0	2.3716	3	1	0	0	0	0	0	1	0
262	7.43858351	5	28	3	1	1	0	0	0	1	0	0	0	0	0.2116	5	0.6	0	0.2	0	0	0	1	0
263	7.614361479	8	63	2	1	1	0	0	1	0	0	0	0	0	11.9716	8	0.375	0.25	0	0	0	0	1	0
264	7.359824036	7	39	2	1	1	0	0	1	0	0	0	0	0	6.0516	7	0.428571429	0	0.142857143	0	0	0	1	0
265	7.531723857	9	44	3	1	0	1	0	1	0	0	0	0	0	19.8916	9	0.777777778	0	0.222222222	0	0	0	1	0
266	7.686010777	5	40	3	1	1	0	0	1	0	0	0	1	0	0.2116	5	0.4	0	0.2	0	0	0	1	0
267	7.723637657	7	44	3	1	1	0	0	1	0	0	0	0	0	6.0516	7	0.428571429	0	0.142857143	0	0.142857143	0	1	0
268	7.806020524	3	65	3	1	1	0	0	1	0	0	0	0	0	2.3716	3	0.333333333	0.666666667	0	0	0	0	1	0
269	7.494046382	5	53	2	1	1	0	0	1	0	0	0	0	0	0.2116	5	0.6	0	0.2	0	0	0.2	1	0
270	7.66720037	5	59	3	1	1	0	0	1	0	0	0	0	0	0.2116	5	0.8	0	0	0	0.2	0	1	0
271	7.600442354	6	42	3	1	1	0	0	1	0	0	0	0	0	2.1316	6	0.5	0	0.166666667	0	0.333333333	0	1	0
272	7.662279739	4	45	4	1	1	0	0	1	0	0	0	0	0	0.2916	4	0.75	0	0	0	0.25	0	1	0
273	8.044022954	2	35	1	1	1	0	0	1	0	0	0	0	0	6.4516	2	1	0	0	0	0	0	1	0
274	7.55478522	6	59	3	1	1	0	0	1	0	0	0	1	0	2.1316	6	0.666666667	0	0.166666667	0	0	0	1	0
275	7.703847059	8	60	6	1	1	0	0	1	0	0	0	0	0	11.9716	8	0.375	0.25	0.125	0	0	0	1	0
276	7.25774996	7	49	4	1	0	0	0	1	0	0	0	0	0	6.0516	7	0.428571429	0	0.142857143	0	0.142857143	0	1	0
277	7.808193013	4	49	4	1	1	0	0	1	0	0	0	0	0	0.2916	4	0.75	0	0	0	0	0	1	0
278	7.629348993	5	28	2	1	1	0	0	1	0	0	0	0	0	0.2116	5	0.4	0	0.2	0	0	0	1	0
279	7.446030686	6	61	3	1	0	1	0	1	0	0	0	0	0	2.1316	6	0.333333333	0.166666667	0.166666667	0.166666667	0	0	1	0
280	7.440592852	6	32	2	1	1	0	0	1	0	0	0	0	0	2.1316	6	0.333333333	0	0.166666667	0.166666667	0	0	1	0
281	7.573269152	8	42	3	1	1	0	0	1	0	0	0	0	0	11.9716	8	0.5	0.125	0.125	0	0.125	0	1	0
282	7.701543858	7	64	3	1	0	0	0	1	0	0	0	1	0	6.0516	7	0.714285714	0.142857143	0.142857143	0	0.142857143	0	1	0
283	7.621249057	5	41	2	1	1	0	0	0	1	0	0	0	0	0.2116	5	0.4	0	0.2	0	0.2	0	1	0
284	7.445528532	5	38	1	1	1	0	0	1	0	0	0	1	0	0.2116	5	0.4	0	0.2	0	0	0	1	0
285	7.492660017	6	46	3	1	1	0	0	1	0	0	0	0	0	2.1316	6	0.5	0	0	0	0	0.166666667	1	0
286	7.721875956	4	75	4	1	0	0	0	1	0	0	0	0	1	0.2916	4	0.75	0.25	0	0	0	0	1	0
287	7.828555826	7	49	3	1	1	0	0	1	0	0	0	0	0	6.0516	7	0.714285714	0	0	0	0	0.285714286	1	0
288	7.363932513	6	47	2	1	1	0	0	1	0	0	0	1	0	2.1316	6	0.666666667	0	0	0	0.166666667	0	1	0
289	7.675657365	4	37	3	1	1	0	0	1	0	0	0	0	0	0.2916	4	0.5	0	0	0	0	0	1	0
290	7.239846504	6	38	2	1	1	0	0	1	0	0	0	0	0	2.1316	6	0.333333333	0	0.166666667	0.166666667	0	0	1	0
291	7.281509538	3	76	1	1	1	0	0	1	0	0	0	0	1	2.3716	3	0.333333333	0.666666667	0	0	0	0	1	0
292	7.642054	5	52	3	1	1	0	0	1	0	0	0	0	0	0.2116	5	1	0	0	0	0	0	1	0
293	7.542054384	5	72	2	1	0	0	0	1	0	0	0	1	0	0.2116	5	0.6	0.4	0	0	0.2	0	1	0
294	7.776128066	3	40	4	1	0	0	0	1	0	0	0	0	1	2.3716	3	0.666666667	0	0	0	0.333333333	0	1	0
295	7.402561271	5	42	3	1	1	0	0	1	0	0	0	0	1	0.2116	5	0.4	0.2	0	0	0	0	1	0
296	7.484295607	5	46	2	1	1	0	0	1	0	0	0	0	0	0.2116	5	0.6	0.2	0	0	0	0	1	0
297	7.186984224	7	62	2	1	1	0	0	1	0	0	0	0	0	6.0516	7	0.714285714	0.142857143	0.142857143	0	0	0	1	0
298	7.4801519	4	33	1	1	1	0	0	1	0	0	0	0	1	0.2916	4	0.5	0	0.25	0	0	0	1	0
299	7.726353796	4	55	3	1	0	1	0	1	0	0	0	1	0	0.2916	4	0.75	0	0	0	0.25	0	1	0
300	7.47756465	2	89	2	1	0	0	0	1	0	0	0	1	0	6.4516	2	0	1	0	0	0	0	1	0
301	7.590983428	4	74	5	0	0	0	0	1	0	0	1	1	0	0.2916	0	0.5	0.5	0	0	0	0	1	0
302	7.59929617	5	51	3	0	1	0	0	1	0	0	0	0	0	0.2116	0	0.8	0	0.2	0	0	0	1	0
303	7.793871299	5	52	2	0	1	0	0	1	0	0	1	0	1	0.2116	0	0.8	0	0	0	0	0.2	1	0
304	7.343296855	6	45	3	0	1	0	0	1	0	0	1	0	1	2.1316	0	0.333333333	0	0.166666667	0	0.333333333	0	1	0
305	7.556333872	4	57	3	0	1	0	0	1	0	0	0	0	0	0.2916	0	1	0	0	0	0	0	1	0
306	7.473977766	2	45	3	0	1	0	0	1	0	0	0	0	0	6.4516	0	1	0	0	0	0	0	1	0
307	6.928831605	1	67	2	0	0	1	0	1	0	0	0	0	0	12.5316	0	0	1	0	0	0	0	1	0
308	7.831887188	4	61	4	0	1	0	0	1	0	0	1	0	1	0.2916	0	0.5	0.5	0	0	0	0	1	0
309	7.727213473	4	34	2	0	1	0	0	1	0	0	0	0	0	0.2916	0	0.5	0	0	0	0	0.25	1	0
310	7.626925894	5	57	3	0	1	0	0	1	0	0	0	0	0	0.2116	0	0.8	0	0	0	0	0.2	1	0
311	7.484694433	5	42	3	0	1	0	0	1	0	0	1	0	1	0.2116	0	0.6	0	0	0	0	0.2	1	0
312	7.520202036	4	46	3	0	1	0	0	1	0	0	0	0	1	0.2916	0	0.75	0	0	0	0	0	1	0
313	7.659694816	7	49	5	0	1	0	0	0	1	0	1	0	1	6.0516	0	0.714285714	0	0	0	0	0.285714286	1	0
314	7.551239415	8	62	5	0	1	0	0	1	0	0	1	0	1	11.9716	0	0.625	0.125	0	0	0	0.125	1	0
315	7.570778247	10	49	4	0	1	0	0	1	0	0	0	0	0	29.8116	0	0.8	0.1	0	0.1	0	0.1	1	0
316	7.472745172	2	46	1	0	0	1	0	1	0	0	0	0	0	6.4516	0	0.5	0	0	0	0	0.5	1	0
317	7.852757853	5	51	4	0	1	0	0	1	0	1	0	0	1	0.2116	0	1	0	0	0	0	0.2	1	0
318	7.401066416	2	42	4	0	0	1	0	1	0	1	0	0	1	6.4516	0	0.5	0	0	0	0.5	0	1	0
319	7.990901922	2	75	2	0	1	0	0	1	0	0	0	0	0	6.4516	0	0	1	0	0	0	0	1	0
320	7.464292046	5	38	3	0	1	0	0	1	0	0	0	1	0	0.2116	0	0.6	0	0	0	0	0.2	1	0
321	7.226834269	5	44	2	0	1	0	0	1	0	0	0	0	0	0.2116	0	0.6	0	0.2	0	0	0.2	1	0
322	7.30004058	10	55	4	0	1	0	0	1	0	0	0	0	0	29.8116	0	0.6	0	0.2	0	0	0	1	0
323	7.298350374	4	28	2	0	1	0	0	0	0	0	0	0	0	0.2916	0	0.75	0	0.25	0	0	0	1	0
324	7.321175329	5	41	2	0	1	0	0	1	0	0	0	0	0	0.2116	0	0.4	0	0	0	0.2	0	1	0
325	7.637807995	1	51	2	0	1	1	0	1	0	0	0	0	0	12.5316	0	1	0	0	0	0	0	1	0
326	7.253880773	8	57	3	0	1	0	0	1	0	0	0	1	0	11.9716	0	0.5	0	0.125	0.125	0	0	1	0
327	7.103223373	4	46	2	0	1	0	0	1	0	0	0	0	0	0.2916	0	0.5	0	0	0	0	0	1	0
328	7.563480927	8	53	3	0	1	0	0	1	0	0	0	0	0	11.9716	0	0.625	0.125	0.125	0	0	0	1	0
329	7.46568393	5	73	3	0	1	0	0	1	0	0	0	0	0	0.2116	0	0.2	0.4	0	0	0	0.2	1	0
330	7.259636753	5	41	2	0	1	0	0	1	0	0	0	1	0	0.2116	0	0.4	0	0	0	0	0.4	1	0
331	7.646587809	5	53	2	0	1	0	0	1	0	0	0	0	0	0.2116	0	0.4	0	0.2	0	0	0	1	0
332	7.329336489	4	29	2	0	1	0	0	1	0	0	0	0	0	0.2916	0	0.5	0	0.5	0	0	0	1	0
333	7.433365076	10	61	3	0	1	0	0	1	0	0	0	1	0	29.8116	0	0.6	0.1	0.1	0	0	0	1	0
334	7.539277025	5	39	2	0	0	0	0	1	0	0	0	1	0	0.2116	0	0.6	0	0.2	0.2	0	0	1	0
335	7.27969118	7	58	4	0	1	0	0	1	0	0	0	0	0	6.0516	0	0.857142857	0	0	0	0	0	1	0
336	7.382404351	6	37	3	0	1	0	0	1	0	0	0	0	0	2.1316	0	0.333333333	0	0.166666667	0	0	0	1	0
337	7.211372214	4	30	2	0	1	0	0	0	1	0	0	0	0	0.2916	0	0.5	0	0.25	0	0	0	1	0
338	7.146520179	5	34	2	0	1	0	0	0	0	0	1	1	0	0.2116	0	0.4	0	0	0	0.2	0	1	0
339	7.247486485	5	44	2	0	1	0	0	0	1	0	0	0	0	0.2116	0	0.4	0	0.4	0	0.2	0	1	0
340	7.071972266	4	27	1	0	1	0	0	0	1	0	1	0	1	0.2916	0	0.5	0	0.25	0.25	0	0	1	0
341	7.390891053	6	53	3	0	1	0	0	0	1	1	0	0	1	2.1316	0	0.833333333	0	0	0	0.166666667	0	1	0
342	7.587508155	3	58	1	0	1	0	0	0	1	0	0	0	0	2.3716	0	1	0	0	0	0	0	1	0
343	7.548540173	4	32	3	0	0	0	0	1	0	0	1	0	1	0.2916	0	0.25	0	0	0	0	0.25	1	0
344	7.746858224	5	37	3	0	1	0	0	0	1	1	0	0	1	0.2116	0	0.4	0	0.2	0	0	0	1	0
345	7.879669915	4	49	4	0	1	0	0	0	0	1	0	0	1	0.2916	0	1	0	0	0	0	0.25	1	0
346	7.855060064	4	61	4	0	1	0	0	0	1	1	0	0	1	0.2916	0	0.5	0.5	0	0	0	0.25	1	0
347	7.548724563	4	49	4	0	1	0	0	0	1	1	0	0	1	0.2916	0	0.5	0	0	0	0.25	0	1	0
348	7.687841334	3	46	4	0	1	0	0	0	1	1	0	0	1	2.3716	0	0.666666667	0	0	0	0	0	1	0
349	7.734051279	3	60	5	0	0	0	0	1	0	1	0	0	1	2.3716	0	0.333333333	0.666666667	0	0	0	0	1	0
350	7.839092246	4	41	3	0	1	0	0	1	0	1	0	0	1	0.2916	0	0.75	0	0	0	0	0.25	1	0
351	7.717836246	4	57	3	0	1	0	0	0	1	1	0	0	1	0.2916	0	1	0	0	0	0	0	1	0
352	7.69955251	4	43	3	0	1	0	0	0	1	0	0	0	0	0.2916	0	1	0	0	0	0	0	1	0
353	7.187649606	3	30	2	0	1	0	0	0	1	0	0	1	0	2.3716	0	0.666666667	0	0.333333333	0	0	0	1	0
354	7.581179229	7	22	1	0	1	0	0	0	1	0	0	1	0	6.0516	0	0.428571429	0.142857143	0	0	0.142857143	0	1	0
355	7.461352995	5	41	3	0	1	0	0	1	0	0	1	0	1	0.2116	0	0.4	0.2	0.2	0	0	0.2	1	0
356	7.315131892	4	45	2	0	1	0	0	0	1	0	0	0	1	0.2916	0	0.5	0	0.25	0	0	0	1	0
357	7.483221919	5	71	2	0	1	0	0	0	1	0	0	0	0	0.2116	0	0.6	0.2	0	0	0	0	1	0
358	7.852684001	2	26	1	0	0	0	0	0	1	1	0	0	1	6.4516	0	1	0	0	0	0	0	1	0
359	7.636578436	3	41	3	0	1	0	0	1	0	0	0	0	1	2.3716	0	0.666666667	0	0	0	0.333333333	0	1	0
360	7.548255618	4	44	2	0	1	0	0	0	1	0	0	1	0	0.2916	0	0.75	0	0	0	0	0.5	1	0
361	7.624052419	7	76	3	1	0	0	0	1	0	0	1	0	0	6.0516	7	0.285714286	0.285714286	0.142857143	0	0.142857143	0	1	0
362	7.732623464	3	26	3	1	0	0	0	1	0	0	1	0	1	2.3716	3	0.333333333	0	0.333333333	0	0	0	1	0
363	7.730042976	5	58	4	1	1	0	0	1	0	0	1	0	1	0.2116	5	0.8	0	0	0	0.2	0	1	0
364	8.113791952	2	40	4	1	0	0	0	1	0	0	1	0	0	6.4516	2	0.5	0	0	0	0.5	0	1	0
365	7.657783613	4	55	2	1	1	0	0	1	0	0	0	0	1	0.2916	4	0.75	0	0	0	0.25	0	1	0
366	7.809232836	6	42	2	1	1	0	0	1	0	0	0	0	0	2.1316	6	0.5	0	0	0	0	0	1	0
367	7.206058249	14	70	3	1	0	0	0	1	0	0	0	0	0	89.4916	14	0.571428571	0.142857143	0.142857143	0.071428571	0	0.071428571	1	0
368	7.655172818	4	45	2	1	0	1	0	1	0	0	0	0	0	0.2916	4	0.5	0	0.25	0.25	0	0	1	0
369	7.540340023	5	38	2	1	1	0	0	1	0	0	0	0	0	0.2116	5	0.4	0	0	0	0	0	1	0
370	7.457643911	4	32	1	1	1	0	0	1	0	0	0	1	0	0.2916	4	0.5	0	0.25	0	0	0	1	0
371	7.890208213	6	38	2	1	1	0	0	1	0	0	0	1	0	2.1316	6	0.333333333	0.166666667	0.166666667	0	0	0	1	0
372	8.119079992	1	78	1	1	0	1	0	1	0	0	0	0	0	12.5316	1	0	1	0	0	0	0	1	0
373	8.192490224	2	28	1	1	1	0	0	0	1	0	1	0	0	6.4516	2	1	0	0	0	0	0	1	0
374	7.656285131	5	47	2	1	1	0	0	0	1	0	0	0	0	0.2116	5	0.4	0	0.2	0	0	0	1	0
375	8.330422552	2	62	1	1	1	0	0	0	1	0	0	1	0	6.4516	2	0.5	0.5	0	0	0	0	1	0
376	8.358631129	2	58	1	1	1	0	0	0	1	0	0	0	0	6.4516	2	1	0	0	0	0	0	1	0
377	7.869875606	4	61	1	1	1	0	0	1	0	0	0	0	0	0.2916	4	0.5	0.25	0.25	0	0	0	1	0
378	7.651334133	7	48	2	1	1	0	0	1	0	0	0	0	0	6.0516	7	0.428571429	0.142857143	0.142857143	0	0.285714286	0.142857143	1	0
379	7.833025574	5	38	2	1	1	0	0	1	0	0	0	0	0	0.2116	5	0.4	0	0	0	0.2	0	1	0
380	7.752721853	4	32	1	1	1	0	0	1	0	0	0	0	0	0.2916	4	0.5	0	0.25	0	0	0	1	0
381	7.973654964	4	48	3	1	1	0	0	1	0	0	0	0	0	0.2916	4	0.75	0	0	0	0.25	0	1	0
382	7.865068945	6	63	4	1	0	0	0	1	0	0	0	1	0	2.1316	6	0.5	0.166666667	0.166666667	0	0.166666667	0	1	0
383	7.244134654	7	35	3	1	1	0	0	1	0	0	0	1	0	6.0516	7	0.428571429	0	0.142857143	0	0.285714286	0	1	0
384	7.717186595	6	49	4	1	1	0	0	1	0	0	0	0	0	2.1316	6	0.666666667	0	0	0	0	0	1	0
385	7.914138968	4	28	2	1	0	0	0	0	0	0	0	0	0	0.2916	4	0.25	0	0	0	0.25	0	1	0
386	7.808887702	3	75	5	1	0	1	0	1	0	0	0	0	0	2.3716	3	0.333333333	0.333333333	0	0	0	0	1	0
387	7.668070333	6	60	4	1	0	0	0	1	0	0	0	0	1	2.1316	6	0.666666667	0.166666667	0	0	0	0.166666667	1	0
388	7.43314631	8	41	3	1	1	0	0	1	0	0	0	0	0	11.9716	8	0.25	0.125	0.125	0	0.125	0.25	1	0
389	7.67705762	5	39	2	1	1	0	0	1	0	0	0	0	1	0.2116	5	0.4	0.2	0	0	0.2	0	1	0
390	7.51871036	7	41	1	1	1	0	0	1	0	0	0	0	0	6.0516	7	0.285714286	0	0.142857143	0	0	0.142857143	1	0
391	7.568787242	6	32	2	1	1	0	0	1	0	0	0	0	0	2.1316	6	0.333333333	0.166666667	0.333333333	0	0	0	1	0
392	7.686322988	5	42	2	1	1	0	0	1	0	0	0	0	0	0.2116	5	0.4	0	0	0	0.2	0	1	0
393	7.475101113	7	45	2	1	1	0	0	1	0	0	0	0	0	6.0516	7	0.571428571	0.142857143	0	0	0.142857143	0	1	0
394	7.770641015	2	64	3	1	1	0	0	1	0	0	0	1	0	6.4516	2	0.5	0.5	0	0	0	0	1	0
395	7.758316381	5	72	4	1	0	0	0	1	0	0	0	0	0	0.2116	5	0.6	0.4	0	0	0	0	1	0
396	8.015228196	5	85	3	1	0	0	0	1	0	0	0	0	1	0.2116	5	0.4	0.4	0.2	0	0	0	1	0
397	7.55307683	6	58	3	1	1	0	0	1	0	0	0	0	1	2.1316	6	0.5	0	0	0	0.166666667	0.166666667	1	0
398	7.576783932	5	82	3	1	0	1	0	1	0	0	0	0	1	0.2116	5	0.4	0.2	0.4	0	0	0	1	0
399	7.604690277	3	72	3	1	1	0	0	1	0	0	0	0	1	2.3716	3	0.666666667	0.333333333	0	0	0	0	1	0
400	7.422750199	6	55	2	1	1	0	0	1	0	0	0	1	0	2.1316	6	0.333333333	0	0	0	0.166666667	0	1	0
401	7.619135228	7	89	3	1	0	0	0	1	0	0	1	0	0	6.0516	7	0.428571429	0.285714286	0	0.142857143	0.142857143	0	1	0
402	7.711226636	4	35	2	1	1	0	0	1	0	0	1	0	0	0.2916	4	0.5	0	0	0	0	0	1	0
403	7.699797117	6	69	3	1	0	0	0	1	0	0	0	0	0	2.1316	6	0.5	0.166666667	0.333333333	0	0	0	1	0
404	7.714615	2	48	4	1	0	1	0	1	0	0	0	1	0	6.4516	2	1	0	0	0	0	0	1	0
405	7.79974922	6	69	3	1	0	0	0	1	0	0	0	0	0	2.1316	6	0.333333333	0.333333333	0	0	0	0.166666667	1	0
406	7.817339573	6	44	3	1	1	0	0	1	0	0	0	0	0	2.1316	6	0.333333333	0.166666667	0	0	0.166666667	0	1	0
407	7.678506812	4	29	2	1	1	0	0	1	0	0	0	0	1	0.2916	4	0.5	0	0.5	0	0	0	1	0
408	7.796321206	3	38	1	1	0	1	0	1	0	0	0	0	0	2.3716	3	0.333333333	0	0	0	0	0	1	0
409	7.735070524	5	69	3	1	1	0	0	1	0	0	0	1	0	0.2116	5	0.6	0.4	0	0	0	0	1	0
410	7.888281986	4	39	1	1	1	0	0	1	0	0	0	0	0	0.2916	4	0.5	0	0.25	0	0	0	1	0
411	7.412878676	7	72	3	1	1	0	0	1	0	0	0	0	0	6.0516	7	0.285714286	0.285714286	0.142857143	0.142857143	0	0	1	0
412	7.358920066	4	34	1	1	1	0	0	1	0	0	0	0	0	0.2916	4	0.5	0	0.5	0	0	0	1	0
413	7.49071364	4	37	2	1	1	0	0	1	0	0	0	1	0	0.2916	4	0.5	0	0.25	0	0	0	1	0
414	7.13898604	5	31	1	1	1	0	0	1	0	0	0	0	0	0.2116	5	0.4	0	0.4	0	0	0	1	0
415	7.825552875	7	78	2	1	1	0	0	1	0	0	0	1	0	6.0516	7	0.285714286	0.285714286	0.142857143	0	0	0	1	0
416	7.659010977	5	44	2	1	1	0	0	1	0	0	0	0	0	0.2116	5	0.4	0	0	0	0	0.2	1	0
417	7.458912537	6	57	3	1	0	0	0	1	0	0	0	0	0	2.1316	6	0.666666667	0	0.166666667	0	0	0	1	0
418	7.688789703	7	54	5	1	1	0	0	1	0	0	1	1	0	6.0516	7	0.857142857	0	0	0.142857143	0	0	1	0
419	7.508129059	4	35	1	1	1	0	0	1	0	0	0	0	0	0.2916	4	0.5	0	0.5	0	0	0	1	0
420	8.010648392	2	64	2	1	1	0	0	1	0	0	0	0	0	6.4516	2	0.5	0.5	0	0	0	0	1	0
421	8.068274504	4	63	3	1	1	0	0	1	0	0	0	0	0	0.2916	4	0.25	0.5	0	0.25	0	0	1	0
422	7.740220825	5	45	2	1	1	0	0	1	0	0	0	0	0	0.2116	5	0.6	0	0	0	0	0.2	1	0
423	7.747411157	4	34	2	1	1	0	0	1	0	0	0	0	0	0.2916	4	0.5	0	0	0	0	0	1	0
424	8.209191398	4	41	3	1	1	0	0	1	0	0	0	0	0	0.2916	4	0.5	0	0	0	0	0.5	1	0
425	7.749925731	10	69	5	1	1	0	0	1	0	0	0	0	0	29.8116	10	0.2	0.2	0.2	0	0	0	1	0
426	7.969247048	6	60	2	1	1	0	0	1	0	0	0	0	0	2.1316	6	0.666666667	0.166666667	0	0	0.166666667	0	1	0
427	8.188458542	4	33	2	1	1	0	0	1	0	0	0	0	1	0.2916	4	0.5	0	0	0	0	0	1	0
428	7.798482019	5	55	2	1	0	1	0	1	0	0	0	0	0	0.2116	5	0.6	0	0.2	0	0	0	1	0
429	8.004966587	6	53	3	1	1	0	0	1	0	0	0	0	0	2.1316	6	0.666666667	0	0	0	0	0	1	0
430	7.936667303	7	42	4	1	1	0	0	1	0	0	0	0	1	6.0516	7	0.428571429	0.285714286	0	0	0	0.285714286	1	0
431	7.838165855	3	90	4	1	0	0	0	1	0	0	0	0	0	2.3716	3	0.333333333	0.666666667	0	0	0	0	1	0
432	7.967443077	5	43	3	1	1	0	0	1	0	0	0	0	0	0.2116	5	0.6	0	0	0	0	0.4	1	0
433	7.574389065	5	38	2	1	1	0	0	1	0	0	0	0	0	0.2116	5	0.4	0	0.2	0.2	0	0	1	0
434	8.154189693	7	50	3	1	1	0	0	1	0	0	0	1	0	6.0516	7	0.714285714	0	0	0	0.142857143	0.142857143	1	0
435	7.397365438	7	55	2	1	1	1	0	1	0	0	0	0	0	6.0516	7	0.571428571	0	0	0	0	0.142857143	1	0
436	7.480191391	6	37	2	1	1	0	0	1	0	0	0	1	0	2.1316	6	0.333333333	0	0.333333333	0	0.166666667	0	1	0
437	7.535152538	5	35	1	1	1	0	0	1	0	0	0	0	0	0.2116	5	0.4	0	0	0.2	0	0	1	0
438	7.704987662	5	85	3	1	0	0	0	1	0	0	0	0	0	0.2116	5	0.6	0.4	0	0	0	0	1	0
439	7.868900823	4	33	2	1	1	0	0	1	0	0	0	0	0	0.2916	4	0.5	0	0	0	0	0	1	0
440	7.433938371	6	45	2	1	1	0	0	1	0	0	0	0	0	2.1316	6	0.333333333	0.166666667	0.166666667	0	0	0	1	0
441	7.600352308	5	30	3	1	0	0	0	1	0	0	0	0	0	0.2116	5	0.2	0.2	0.2	0	0	0	1	0
442	8.082763634	2	47	2	1	1	0	0	1	0	0	0	0	0	6.4516	2	1	0	0	0	0	0	1	0
443	7.944027517	5	37	3	1	1	0	0	1	0	0	0	0	0	0.2116	5	0.6	0	0	0	0	0.4	1	0
444	7.82123005	10	76	5	1	0	0	0	1	0	0	0	0	0	29.8116	10	0.6	0.2	0.1	0	0	0.1	1	0
445	7.603683589	8	43	3	1	1	0	0	1	0	0	0	0	0	11.9716	8	0.25	0.125	0	0.125	0.25	0	1	0
446	7.743828955	6	49	3	1	1	0	0	1	0	0	0	0	0	2.1316	6	0.333333333	0	0.166666667	0	0	0.166666667	1	0
447	7.942639385	5	35	2	1	1	0	0	1	0	0	0	0	0	0.2116	5	0.4	0	0	0	0	0	1	0
448	7.907927495	7	61	4	1	1	0	0	1	0	0	1	0	0	6.0516	7	0.571428571	0.285714286	0	0	0	0	1	0
449	7.494168779	5	37	2	1	1	0	0	1	0	0	0	0	0	0.2116	5	0.4	0	0.4	0	0	0	1	0
450	8.012776983	5	63	4	1	0	0	0	1	0	0	0	0	0	0.2116	5	0.6	0.2	0	0	0	0.2	1	0
451	7.947381603	7	48	4	1	1	0	0	1	0	0	0	0	0	6.0516	7	0.285714286	0.142857143	0.142857143	0	0.142857143	0	1	0
452	8.100106817	4	63	6	1	1	0	0	1	0	0	0	1	0	0.2916	4	0.75	0.25	0	0	0	0	1	0
453	7.980639419	4	52	5	1	1	0	0	1	0	0	0	0	1	0.2916	4	0.75	0	0	0	0.25	0.25	1	0
454	7.605004037	6	39	2	1	1	0	0	1	0	0	0	0	0	2.1316	6	0.333333333	0	0.166666667	0	0	0.166666667	1	0
455	8.115144242	1	71	2	1	0	1	0	1	0	0	0	0	0	12.5316	1	0	1	0	0	0	0	1	0
456	7.888368259	9	31	4	1	1	0	0	1	0	0	0	0	1	19.8916	9	0.444444444	0.111111111	0.111111111	0	0	0.111111111	1	0
457	7.799687742	4	48	2	1	0	0	0	1	0	0	1	1	0	0.2916	4	0.75	0	0	0	0	0	1	0
458	7.81533619	6	38	3	1	1	0	0	1	0	0	0	0	0	2.1316	6	0.333333333	0	0	0	0.166666667	0	1	0
459	7.943477465	5	51	4	1	1	0	0	1	0	0	0	0	1	0.2116	5	0.8	0	0	0	0	0.2	1	0
460	7.358404056	9	65	3	1	0	0	0	1	0	0	0	0	0	19.8916	9	0.444444444	0.111111111	0.111111111	0.111111111	0.111111111	0.111111111	1	0
461	7.713440654	4	42	3	1	1	0	0	1	0	0	0	0	0	0.2916	4	0.5	0	0	0	0	0	1	0
462	7.468621713	5	35	3	1	1	0	0	1	0	0	0	0	0	0.2116	5	0.4	0	0	0.2	0	0	1	0
463	7.761493782	5	71	3	1	1	0	0	1	0	0	0	1	0	0.2116	5	0.4	0.4	0	0	0	0	1	0
464	8.161126634	4	28	3	1	1	0	0	1	0	0	0	0	0	0.2916	4	0.75	0	0.25	0	0	0	1	0
465	7.726199417	5	47	3	1	0	0	0	1	0	0	0	0	0	0.2116	5	0.8	0	0	0.2	0	0	1	0
466	7.796300643	3	29	3	1	1	0	0	1	0	0	0	0	0	2.3716	3	0.666666667	0	0.333333333	0	0	0	1	0
467	7.776459522	4	45	3	1	1	0	0	1	0	0	0	0	0	0.2916	4	0.5	0	0.25	0	0	0	1	0
468	7.968724543	4	30	3	1	1	0	0	1	0	0	0	0	0	0.2916	4	0.5	0	0.25	0	0	0	1	0
469	7.720435075	7	48	5	1	1	0	0	1	0	0	0	1	0	6.0516	7	0.571428571	0	0	0	0.285714286	0	1	0
470	7.877552654	4	35	2	1	0	0	0	1	0	0	0	0	0	0.2916	4	0.5	0	0	0	0	0	1	0
471	7.846214465	8	49	4	1	1	0	0	1	0	0	0	1	0	11.9716	8	0.625	0	0	0	0.125	0.125	1	0
472	7.684351666	5	55	4	1	1	0	0	1	0	0	0	0	1	0.2116	5	0.4	0	0	0	0.4	0	1	0
473	7.794983765	5	43	2	1	1	0	0	1	0	0	0	0	0	0.2116	5	0.4	0	0.2	0	0	0.2	1	0
474	7.821562931	5	47	3	1	1	0	0	1	0	0	0	0	0	0.2116	5	0.8	0	0	0	0.2	0.2	1	0
475	7.924036132	4	35	1	1	1	0	0	1	0	0	0	1	0	0.2916	4	0.5	0	0.25	0	0	0	1	0
476	7.917412485	5	35	4	1	0	0	0	1	0	0	0	0	0	0.2116	5	0.2	0	0.2	0	0.4	0	1	0
477	7.822861309	5	30	3	1	1	0	0	1	0	0	0	0	0	0.2116	5	0.4	0	0.2	0.2	0	0	1	0
478	7.68783675	3	30	1	1	1	0	0	1	0	0	0	0	0	2.3716	3	0.666666667	0	0.333333333	0	0	0	1	0
479	7.831533906	4	35	2	1	1	0	0	1	0	0	0	0	0	0.2916	4	0.5	0	0.25	0	0	0	1	0
480	7.906296741	4	35	3	1	1	0	0	1	0	0	0	0	0	0.2916	4	0.5	0	0	0	0	0.25	1	0
481	8.102053434	3	39	2	0	0	0	0	0	1	0	0	0	1	2.3716	0	0.333333333	0	0	0	0.333333333	0.333333333	1	0
482	8.007959633	2	65	3	0	0	1	0	1	0	0	1	0	1	6.4516	0	0	0.5	0	0	0.5	0	1	0
483	7.709595416	5	40	2	0	1	0	0	1	0	0	1	0	0	0.2116	0	0.4	0	0.2	0	0	0	1	0
484	7.497706267	2	37	1	0	1	0	1	1	0	0	0	0	0	6.4516	0	0.5	0	0	0	0	0	1	0
485	7.950629321	8	58	2	0	1	0	0	0	1	0	1	0	1	11.9716	0	0.5	0	0.25	0	0	0	1	0
486	7.620812924	8	58	3	0	1	0	0	1	0	0	1	0	0	11.9716	0	0.625	0	0.25	0	0	0.125	1	0
487	7.715489282	5	27	3	0	1	0	0	1	0	0	0	0	1	0.2116	0	0.4	0.2	0.2	0.2	0	0	1	0
488	7.826734394	6	58	2	0	1	0	0	1	0	0	0	0	0	2.1316	0	0.666666667	0	0	0	0.333333333	0	1	0
489	7.889957339	6	31	3	0	1	0	0	1	0	0	0	0	0	2.1316	0	0.5	0	0	0.166666667	0	0	1	0
490	7.726009719	4	55	3	0	1	0	0	1	0	0	0	0	1	0.2916	0	0.75	0	0	0	0	0	1	0
491	7.697997409	6	53	4	0	1	0	0	1	0	0	1	0	0	2.1316	0	0.833333333	0	0.166666667	0	0	0	1	0
492	7.614608107	10	68	4	0	0	0	0	1	0	0	1	0	1	29.8116	0	0.6	0.2	0.2	0	0	0	1	0
493	7.755450203	11	55	4	0	1	0	0	1	0	0	0	0	0	41.7316	0	0.636363636	0	0.090909091	0.090909091	0.090909091	0	1	0
494	7.878246276	5	75	2	0	1	0	0	1	0	0	0	0	0	0.2116	0	0.4	0.4	0	0	0	0	1	0
495	7.565451432	6	41	6	0	1	0	0	1	0	0	1	1	0	2.1316	0	0.5	0	0.166666667	0	0.333333333	0.166666667	1	0
496	7.242425894	9	65	2	0	0	0	0	0	0	0	0	0	0	19.8916	0	0.666666667	0.111111111	0	0	0	0.222222222	1	0
497	7.706315974	5	42	3	0	0	0	0	1	0	0	1	0	1	0.2116	0	0.6	0	0	0	0.4	0	1	0
498	7.64385179	3	30	2	0	1	0	0	0	1	0	1	0	1	2.3716	0	0.666666667	0	0.333333333	0	0	0	1	0
499	7.773358849	9	55	4	0	1	0	0	1	0	0	1	0	1	19.8916	0	0.777777778	0	0.111111111	0	0	0.111111111	1	0
500	7.827986238	5	38	3	0	1	0	0	1	0	0	0	0	0	0.2116	0	0.4	0.2	0	0	0.2	0	1	0
501	7.761698155	5	53	3	0	1	0	0	0	0	0	1	0	1	0.2116	0	0.6	0	0	0	0.2	0.2	1	0
502	7.90041799	6	57	3	0	1	0	0	1	0	0	0	0	1	2.1316	0	0.833333333	0.166666667	0	0	0	0	1	0
503	7.812827316	5	45	2	0	1	0	0	1	0	0	0	0	0	0.2116	0	0.4	0.2	0	0	0	0	1	0
504	7.678853751	6	38	2	0	1	0	0	1	0	0	0	0	0	2.1316	0	0.333333333	0	0	0	0	0.166666667	1	0
505	7.462260889	7	48	2	0	1	0	0	1	0	0	0	0	0	6.0516	0	0.428571429	0.142857143	0	0	0	0.285714286	1	0
506	7.766743116	4	35	2	0	1	0	0	1	0	0	0	0	0	0.2916	0	0.5	0.25	0.25	0	0	0	1	0
507	7.719960238	5	43	2	0	1	0	0	1	0	0	0	0	0	0.2116	0	0.6	0	0	0	0	0.2	1	0
508	7.716126669	5	35	2	0	1	0	0	1	0	0	0	0	0	0.2116	0	0.4	0	0.2	0	0.2	0	1	0
509	7.867185957	5	72	4	0	0	0	0	1	0	0	0	0	0	0.2116	0	0.8	0.2	0	0	0	0	1	0
510	7.672157437	5	43	3	0	1	0	0	1	0	0	0	0	1	0.2116	0	0.6	0.2	0	0	0.2	0	1	0
511	7.741025206	3	37	2	0	1	0	0	0	1	0	1	0	1	2.3716	0	0.666666667	0	0	0	0	0	1	0
512	7.724053285	5	45	2	0	1	0	0	1	0	0	0	0	0	0.2116	0	0.6	0.2	0	0	0	0.2	1	0
513	8.000175101	4	55	2	0	1	0	0	1	0	0	0	1	0	0.2916	0	1	0	0	0	0	0	1	0
514	7.949779579	4	53	3	0	1	0	0	1	0	0	0	1	0	0.2916	0	1	0	0	0	0	0	1	0
515	7.947731592	4	35	2	0	1	0	0	0	1	0	1	1	0	0.2916	0	0.75	0	0	0	0	0	1	0
516	7.91133135	4	42	2	0	1	0	0	1	0	0	1	0	1	0.2916	0	0.5	0	0	0	0.25	0	1	0
517	7.755578716	5	48	3	0	1	0	0	0	1	0	1	0	1	0.2116	0	0.4	0	0.2	0	0.2	0	1	0
518	8.176700885	4	40	4	0	1	0	0	1	0	0	1	0	1	0.2916	0	0.5	0	0	0	0	0	1	0
519	7.912595205	5	48	4	0	1	0	0	1	0	0	1	0	1	0.2116	0	0.6	0	0	0	0.2	0.2	1	0
520	8.012998865	4	42	2	0	1	0	0	1	0	0	1	0	1	0.2916	0	0.75	0.25	0	0	0	0	1	0
521	8.064060838	4	43	3	1	1	0	0	0	1	0	1	0	1	0.2916	4	0.75	0	0	0	0	0.25	1	0
522	7.549914382	6	50	3	1	1	0	0	1	0	0	0	0	0	2.1316	6	0.333333333	0	0.166666667	0	0	0.166666667	1	0
523	7.850863194	3	62	3	1	1	0	0	1	0	0	0	1	0	2.3716	3	0.666666667	0.333333333	0	0	0	0	1	0
524	7.282053025	4	68	4	1	0	1	0	1	0	0	0	0	0	0.2916	4	0.75	0.25	0	0	0.25	0	1	0
525	7.761170107	5	28	3	1	0	0	0	1	0	0	0	0	1	0.2116	5	1	0	0	0	0	0	1	0
526	7.406085155	6	38	2	1	1	0	0	1	0	0	0	0	0	2.1316	6	0.333333333	0.166666667	0	0	0	0.333333333	1	0
527	7.831466411	4	54	4	1	1	0	0	1	0	0	0	0	0	0.2916	4	0.75	0	0	0	0.25	0	1	0
528	7.382460339	3	41	2	1	0	1	0	1	0	0	0	0	0	2.3716	3	1	0	0	0	0	0	1	0
529	7.46849044	6	71	3	1	1	0	0	1	0	0	0	0	0	2.1316	6	0.666666667	0.166666667	0.166666667	0	0	0	1	0
530	7.807371765	5	59	4	1	0	0	0	1	0	1	0	0	0	0.2116	5	0.6	0	0	0	0.2	0.2	1	0
531	7.810178297	2	70	2	1	0	0	0	1	0	0	0	0	0	6.4516	2	0	1	0	0	0	0	1	0
532	8.03469908	2	64	2	1	0	1	0	1	0	0	0	1	0	6.4516	2	0.5	0.5	0	0	0	0	1	0
533	7.751630145	4	50	3	1	1	0	0	1	0	0	0	0	0	0.2916	4	0.75	0	0	0	0	0.25	1	0
534	7.821386477	4	54	3	1	1	0	0	1	0	1	0	0	1	0.2916	4	0.75	0	0	0	0	0	1	0
535	7.889541574	4	57	4	1	1	0	0	1	0	0	0	0	1	0.2916	4	1	0	0	0	0	0	1	0
536	7.769961456	3	66	4	1	0	1	0	1	0	0	0	1	0	2.3716	3	0.333333333	0.333333333	0	0	0.333333333	0	1	0
537	7.800515323	6	73	3	1	0	0	0	1	0	0	0	0	0	2.1316	6	0.5	0.333333333	0.166666667	0	0	0	1	0
538	7.541852847	3	63	3	1	0	0	0	1	0	0	0	1	0	2.3716	3	0.666666667	0.333333333	0	0	0	0	1	0
539	7.528702666	6	36	4	1	1	0	0	1	0	1	0	0	0	2.1316	6	0.333333333	0.166666667	0.166666667	0	0	0.166666667	1	0
540	7.513621955	6	58	3	1	1	0	0	1	0	0	0	0	0	2.1316	6	0.666666667	0	0	0	0.166666667	0.166666667	1	0
541	7.55010904	9	46	8	1	1	0	0	1	0	1	0	0	1	19.8916	9	0.444444444	0.111111111	0.111111111	0	0.111111111	0	1	0
542	7.470998765	3	51	3	1	0	0	0	1	0	0	0	1	0	2.3716	3	1	0	0	0	0	0	1	0
543	7.709389084	5	41	2	1	1	0	0	1	0	1	0	0	1	0.2116	5	0.8	0	0	0	0.2	0	1	0
544	7.513523742	7	63	3	1	0	0	0	1	0	0	0	0	0	6.0516	7	0.857142857	0.142857143	0	0	0	0	1	0
545	7.68775424	2	25	3	1	1	0	0	1	0	0	0	1	0	6.4516	2	1	0	0	0	0	0	1	0
546	7.543109138	6	38	3	1	1	0	0	1	0	0	0	0	0	2.1316	6	0.5	0	0	0	0.166666667	0	1	0
547	7.372633295	6	51	2	1	1	0	0	1	0	0	0	1	0	2.1316	6	0.333333333	0	0	0	0.166666667	0.166666667	1	0
548	7.530893	6	44	3	1	1	0	0	1	0	0	0	0	0	2.1316	6	0.333333333	0.166666667	0	0	0.166666667	0.166666667	1	0
549	7.787527244	4	56	2	1	1	0	0	1	0	0	0	0	0	0.2916	4	0.5	0	0	0	0	0.25	1	0
550	7.664801714	4	56	3	1	1	0	0	1	0	0	0	1	0	0.2916	4	0.75	0	0	0	0	0.25	1	0
551	7.519225918	5	30	2	1	1	0	0	1	0	0	0	0	0	0.2116	5	0.8	0	0.2	0	0	0	1	0
552	7.616706909	4	38	1	1	1	0	0	1	0	0	0	0	0	0.2916	4	0.5	0	0	0	0	0.5	1	0
553	7.638029637	5	41	1	1	1	0	0	1	0	0	0	1	0	0.2116	5	0.4	0	0	0	0.2	0	1	0
554	7.817822686	6	48	4	1	0	0	0	1	0	0	0	1	0	2.1316	6	0.833333333	0.166666667	0	0	0	0	1	0
555	7.826359333	3	37	2	1	1	0	0	1	0	0	0	0	0	2.3716	3	0.666666667	0	0	0	0	0.333333333	1	0
556	7.722633248	8	51	3	1	1	0	0	1	0	0	0	0	0	11.9716	8	0.625	0	0.125	0	0	0.125	1	0
557	7.07582577	4	42	3	1	1	1	0	1	0	0	0	0	0	0.2916	4	0.25	0	0	0	0	0	1	0
558	7.773064247	3	56	4	1	1	0	0	1	0	1	0	0	0	2.3716	3	0.666666667	0.333333333	0	0	0	0	1	0
559	7.535697049	5	48	3	1	1	0	0	1	0	0	0	0	0	0.2116	5	0.8	0	0	0	0.2	0	1	0
560	7.645172901	4	61	3	1	1	0	0	1	0	0	0	1	0	0.2916	4	0.75	0.25	0	0	0	0	1	0
561	7.819162104	5	38	3	1	0	1	0	1	0	1	0	0	0	0.2116	5	0.4	0	0.2	0	0.4	0	1	0
562	7.781476657	4	30	3	1	1	0	0	0	0	0	0	0	0	0.2916	4	0.5	0	0	0	0	0	1	0
563	7.574722742	3	29	3	1	1	0	0	1	0	0	0	0	0	2.3716	3	0.666666667	0	0.333333333	0	0	0	1	0
564	7.736652015	3	32	2	1	0	0	0	0	0	0	0	1	0	2.3716	3	0.333333333	0	0	0	0	0	1	0
565	7.707682967	6	50	4	1	1	0	0	1	0	0	0	0	0	2.1316	6	0.5	0	0.166666667	0	0	0.166666667	1	0
566	7.78821985	4	48	3	1	1	0	0	1	0	0	1	1	0	0.2916	4	0.5	0	0	0	0	0	1	0
567	7.560653218	7	50	3	1	1	0	0	1	0	0	0	0	0	6.0516	7	0.428571429	0	0.142857143	0	0.285714286	0	1	0
568	7.595181124	6	70	3	1	0	0	0	1	0	0	0	1	0	2.1316	6	0.5	0.166666667	0.333333333	0	0	0	1	0
569	8.109200893	3	45	3	1	1	0	0	1	0	0	0	0	0	2.3716	3	0.666666667	0	0	0	0	0.333333333	1	0
570	7.670143967	7	45	5	1	1	0	0	1	0	0	0	1	0	6.0516	7	0.571428571	0.142857143	0	0	0	0.285714286	1	0
571	7.591341903	6	54	3	1	1	0	0	1	0	0	0	0	0	2.1316	6	0.5	0	0	0	0	0	1	0
572	7.686052105	4	27	3	1	1	0	0	1	0	0	0	0	0	0.2916	4	0.5	0.25	0.25	0	0	0	1	0
573	7.599331226	3	24	2	1	1	0	0	0	0	0	0	0	0	2.3716	3	0.666666667	0	0.333333333	0	0	0	1	0
574	7.60897479	5	41	3	1	1	0	0	1	0	0	0	1	0	0.2116	5	0.6	0	0	0	0.4	0	1	0
575	7.928384404	3	61	4	1	1	0	0	1	0	0	0	0	1	2.3716	3	0.666666667	0.333333333	0	0	0	0	1	0
576	7.66125881	5	40	1	1	1	0	0	1	0	0	0	0	1	0.2116	5	0.4	0	0	0	0.2	0	1	0
577	7.484065226	4	40	3	1	1	0	0	1	0	0	0	0	1	0.2916	4	0.5	0	0.25	0	0	0	1	0
578	7.822304495	4	70	3	1	1	0	0	0	0	0	0	0	0	0.2916	4	0.75	0.25	0	0	0	0	1	0
579	7.748403939	8	63	4	1	0	1	0	1	0	1	0	1	0	11.9716	8	0.375	0.125	0.125	0.125	0.125	0	1	0
580	7.73190002	4	65	4	1	1	0	0	1	0	0	0	0	0	0.2916	4	0.25	0.25	0	0	0.25	0	1	0
581	7.661103462	1	74	3	1	0	1	0	1	0	1	0	0	0	12.5316	1	0	1	0	0	0	0	1	0
582	7.812892036	5	52	4	1	1	0	0	1	0	0	0	0	0	0.2116	5	0.6	0	0	0	0	0.2	1	0
583	7.606944172	2	42	3	1	0	0	0	1	0	0	0	0	0	6.4516	2	0.5	0	0	0	0	0	1	0
584	7.539495031	4	72	5	1	1	0	0	1	0	0	0	1	0	0.2916	4	0.5	0.5	0	0	0	0	1	0
585	7.584269902	2	26	2	1	0	0	0	1	0	0	0	0	0	6.4516	2	0.5	0	0	0	0	0	1	0
586	7.596181333	5	59	3	1	0	1	0	1	0	0	0	1	0	0.2116	5	0.8	0	0	0.2	0	0	1	0
587	7.636433683	3	50	4	1	0	0	0	1	0	0	0	0	0	2.3716	3	0.666666667	0	0	0	0	0	1	0
588	7.846578243	4	77	4	1	0	1	0	1	0	1	0	0	0	0.2916	4	0.25	0.25	0.25	0	0	0	1	0
589	7.620455056	5	70	4	1	1	0	0	1	0	0	0	0	0	0.2116	5	0.4	0.4	0.2	0	0	0	1	0
590	7.708958339	6	69	4	1	1	1	0	1	0	0	0	0	0	2.1316	6	0.666666667	0.166666667	0	0	0	0.166666667	1	0
591	7.77976387	7	50	5	1	1	0	0	1	0	0	0	1	0	6.0516	7	0.571428571	0.142857143	0	0	0.142857143	0	1	0
592	7.971120283	1	70	2	1	0	1	0	1	0	0	0	0	0	12.5316	1	0	1	0	0	0	0	1	0
593	7.462714528	4	40	1	1	1	0	0	1	0	0	0	0	0	0.2916	4	0.5	0	0	0	0	0.25	1	0
594	7.568353441	5	42	3	1	1	0	0	1	0	0	0	0	1	0.2116	5	0.4	0	0.2	0	0.2	0	1	0
595	7.422014999	7	51	3	1	1	0	0	1	0	0	0	0	0	6.0516	7	0.571428571	0.142857143	0	0	0.285714286	0	1	0
596	7.769762989	3	58	3	1	1	0	0	1	0	0	0	0	0	2.3716	3	0.666666667	0	0	0	0	0	1	0
597	7.646129139	3	30	2	1	1	0	0	1	0	0	0	0	0	2.3716	3	0.666666667	0	0	0	0	0	1	0
598	7.641444415	4	68	5	1	0	1	0	1	0	0	0	1	0	0.2916	4	0.25	0.25	0.25	0	0	0	1	0
599	7.480005205	4	41	4	1	1	0	0	1	0	0	0	0	1	0.2916	4	0.5	0	0.25	0	0	0.25	1	0
600	7.829379761	3	77	5	1	1	0	0	1	0	0	0	1	0	2.3716	3	0.333333333	0.666666667	0	0	0	0	1	0
601	7.879117359	1	58	2	1	0	1	0	1	0	0	0	1	0	12.5316	1	1	0	0	0	0	0	1	0
602	7.848149181	3	40	4	1	1	0	0	1	0	0	0	1	0	2.3716	3	0.666666667	0	0	0	0	0	1	0
603	7.81407244	4	59	3	1	1	0	0	1	0	0	0	0	0	0.2916	4	0.75	0	0	0	0	0	1	0
604	7.452767814	6	36	3	1	1	0	0	1	0	0	0	0	0	2.1316	6	0.333333333	0	0.333333333	0	0	0	1	0
605	7.405295035	9	72	3	1	0	0	0	1	0	0	0	0	0	19.8916	9	0.444444444	0.222222222	0.111111111	0.111111111	0.111111111	0	1	0
606	7.988648169	4	58	4	1	1	0	0	1	0	0	0	0	0	0.2916	4	0.75	0	0.25	0	0	0	1	0
607	7.9580313	4	63	3	1	1	0	0	1	0	0	0	0	0	0.2916	4	0.5	0.25	0	0	0.25	0	1	0
608	7.615475751	5	66	3	1	0	0	0	1	0	0	0	1	0	0.2116	5	0.6	0.2	0	0	0	0	1	0
609	7.901425483	6	70	4	1	1	0	0	1	0	0	0	0	0	2.1316	6	0.666666667	0.166666667	0	0	0.166666667	0	1	0
610	7.559403152	6	58	4	1	1	0	0	1	0	0	0	1	0	2.1316	6	0.666666667	0	0.166666667	0.166666667	0	0	1	0
611	7.853119258	3	34	4	1	0	0	0	1	0	0	0	0	1	2.3716	3	0.666666667	0	0	0	0.333333333	0	1	0
612	7.761357511	2	49	2	1	1	0	0	1	0	0	0	0	0	6.4516	2	1	0	0	0	0	0	1	0
613	7.588318614	7	70	3	1	0	0	0	1	0	0	0	0	0	6.0516	7	0.285714286	0.285714286	0.142857143	0	0	0	1	0
614	7.707395334	3	79	3	1	1	0	0	1	0	0	0	0	1	2.3716	3	0.333333333	0.666666667	0	0	0	0	1	0
615	7.79551484	5	62	4	1	1	0	0	1	0	0	0	0	0	0.2116	5	0.8	0.2	0	0	0	0	1	0
616	7.748563556	5	45	3	1	1	0	0	1	0	0	0	1	0	0.2116	5	0.8	0	0	0	0	0	1	0
617	8.115873479	2	63	2	1	0	1	0	1	0	0	0	0	0	6.4516	2	0.5	0.5	0	0	0	0	1	0
618	7.620847234	4	75	4	1	0	0	0	1	0	0	0	0	1	0.2916	4	0.5	0.25	0	0	0	0	1	0
619	7.762778933	3	72	3	1	1	0	0	0	0	0	0	0	0	2.3716	3	0.333333333	0.666666667	0	0	0	0	1	0
620	8.046667826	4	55	5	1	1	0	0	1	0	0	0	0	0	0.2916	4	1	0	0	0	0	0	1	0
621	7.097945794	3	31	2	0	1	0	0	0	1	0	1	0	1	2.3716	0	0.666666667	0	0	0.333333333	0	0	1	0
622	7.647843296	2	30	3	0	0	0	0	1	0	1	0	0	1	6.4516	0	0.5	0	0	0	0	0	1	0
623	7.329454564	4	36	2	0	1	0	0	0	1	0	1	0	1	0.2916	0	0.5	0	0.25	0	0	0	1	0
624	7.691396515	3	69	4	0	0	0	0	1	0	0	1	1	0	2.3716	0	0.666666667	0.333333333	0	0	0	0	1	0
625	7.628361972	3	24	1	0	1	0	0	0	1	0	1	1	0	2.3716	0	0.666666667	0	0.333333333	0	0	0	1	0
626	7.6815742	4	42	2	0	1	0	0	0	1	0	1	0	1	0.2916	0	0.5	0	0	0	0	0	1	0
627	7.496036266	5	55	3	0	1	0	0	0	1	0	0	0	1	0.2116	0	0.8	0	0	0	0.2	0	1	0
628	7.45799006	7	52	4	0	1	0	0	1	0	0	1	0	1	6.0516	0	0.857142857	0	0	0	0.285714286	0	1	0
629	7.437447798	3	41	1	0	1	0	0	1	0	0	0	1	0	2.3716	0	0.666666667	0	0	0	0	0	1	0
630	7.647389975	2	40	3	0	0	0	0	0	1	0	1	0	1	6.4516	0	1	0	0	0	0	0	1	0
631	7.331171628	2	55	3	0	1	0	0	0	1	1	0	0	1	6.4516	0	1	0	0	0	0	0	1	0
632	7.519855081	4	43	3	0	1	0	0	0	1	0	1	0	1	0.2916	0	0.5	0	0	0	0.25	0	1	0
633	7.286862722	2	23	1	0	0	0	0	0	1	0	0	0	0	6.4516	0	0.5	0	0	0	0	0	1	0
634	7.452454654	3	32	2	0	0	0	0	0	1	1	0	0	0	2.3716	0	0.333333333	0	0	0.333333333	0	0.333333333	1	0
635	7.322014935	5	38	2	0	1	0	0	0	0	0	0	1	0	0.2116	0	0.4	0	0.2	0	0.2	0	1	0
636	7.566880211	6	65	3	0	0	0	0	0	1	1	0	0	1	2.1316	0	0.833333333	0.166666667	0	0	0	0	1	0
637	7.511814382	5	36	3	0	1	0	0	1	0	0	0	0	0	0.2116	0	0.4	0.2	0	0	0	0	1	0
638	7.684940253	4	48	2	0	1	0	0	0	1	0	1	0	1	0.2916	0	0.5	0	0	0	0	0.25	1	0
639	7.697180353	4	55	3	0	1	0	0	0	1	0	1	0	1	0.2916	0	1	0	0	0	0	0	1	0
640	7.405027469	4	42	3	0	1	0	0	0	1	1	0	0	1	0.2916	0	0.5	0	0	0.25	0	0	1	0
641	7.718952126	5	51	2	0	1	0	0	0	0	1	0	0	1	0.2116	0	0.8	0	0	0	0	0	1	0
642	7.674933286	6	38	4	0	1	0	0	0	1	0	0	0	1	2.1316	0	0.666666667	0	0.166666667	0	0	0	1	0
643	7.610253601	3	30	4	0	1	0	0	0	1	0	0	0	1	2.3716	0	0.666666667	0	0.333333333	0	0	0	1	0
644	8.190958769	4	35	4	0	1	0	0	0	1	0	0	0	1	0.2916	0	0.5	0	0.25	0	0	0	1	0
645	8.066584263	4	30	3	0	0	0	0	0	1	0	0	0	1	0.2916	0	0.25	0	0	0	0	0.25	1	0
646	7.570381394	4	32	3	0	1	0	0	0	1	0	1	0	1	0.2916	0	0.5	0	0	0.25	0	0	1	0
647	7.50321245	5	50	3	0	1	0	0	0	1	0	1	0	1	0.2116	0	0.6	0	0	0	0.2	0.4	1	0
648	7.258398066	5	35	3	0	1	0	0	1	0	0	0	0	1	0.2116	0	0.4	0	0	0	0	0	1	0
649	7.894981528	4	42	6	0	0	0	0	1	0	1	0	0	1	0.2916	0	0.5	0	0	0	0	0	1	0
650	7.025636088	10	48	4	0	1	0	0	1	0	0	0	1	0	29.8116	0	0.3	0.2	0.2	0	0	0	1	0
651	7.82399801	5	52	4	0	1	0	0	0	1	0	0	0	1	0.2116	0	0.6	0	0	0	0.2	0	1	0
652	7.725312378	4	52	4	0	1	0	0	1	0	0	0	0	0	0.2916	0	0.5	0	0	0	0.25	0.25	1	0
653	7.590973328	4	54	3	0	1	0	0	1	0	0	0	1	0	0.2916	0	0.75	0	0.25	0	0	0	1	0
654	7.296128482	4	26	3	0	0	0	0	1	0	0	0	1	0	0.2916	0	0.25	0.5	0	0	0	0	1	0
655	7.543119733	3	20	2	0	0	0	0	0	0	0	1	0	0	2.3716	0	0.333333333	0.333333333	0.333333333	0	0	0	1	0
656	7.381296394	5	38	3	0	1	0	0	1	0	0	0	0	1	0.2116	0	0.6	0.2	0	0	0.2	0.2	1	0
657	7.539011098	4	29	3	0	0	0	0	1	0	0	0	0	0	0.2916	0	0.25	0	0.25	0	0.25	0	1	0
658	7.549135369	8	45	4	0	1	0	0	1	0	0	0	0	0	11.9716	0	0.625	0.125	0	0	0	0.25	1	0
659	7.644072096	5	48	2	0	0	0	0	1	0	0	0	0	0	0.2116	0	0.8	0	0	0	0.2	0	1	0
660	7.776237165	5	48	5	0	1	0	0	1	0	0	0	0	1	0.2116	0	1	0	0	0	0	0	1	0
661	7.660797403	4	42	5	0	0	0	0	1	0	0	1	0	0	0.2916	0	0.75	0	0	0	0.25	0.25	1	0
662	7.412860573	7	40	2	0	1	0	0	0	0	0	0	0	0	6.0516	0	0.285714286	0.142857143	0.285714286	0	0	0.142857143	1	0
663	7.861330235	3	72	3	0	1	0	0	1	0	0	0	0	1	2.3716	0	0.333333333	0.333333333	0	0	0	0	1	0
664	7.545225888	5	45	3	0	1	0	0	1	0	0	0	0	0	0.2116	0	0.4	0	0.2	0	0	0.2	1	0
665	8.001251168	2	48	4	0	0	1	0	1	0	0	0	0	0	6.4516	0	1	0	0	0	0	0	1	0
666	7.67504936	4	35	3	0	1	0	0	1	0	0	0	0	0	0.2916	0	0.5	0	0	0	0	0.25	1	0
667	7.496735676	7	51	2	0	1	0	0	1	0	0	0	0	0	6.0516	0	0.428571429	0	0.142857143	0	0.285714286	0	1	0
668	7.657977259	1	72	2	0	0	1	0	1	0	0	0	0	0	12.5316	0	0	1	0	0	0	0	1	0
669	7.425846445	4	35	2	0	1	0	0	1	0	0	0	0	0	0.2916	0	0.5	0	0	0	0	0	1	0
670	7.127950488	6	33	2	0	1	0	0	0	0	0	0	0	0	2.1316	0	0.333333333	0	0.5	0	0	0	1	0
671	7.4906299	4	32	2	0	1	0	0	1	0	0	0	0	0	0.2916	0	0.5	0	0.25	0	0	0	1	0
672	7.451102302	6	30	1	0	1	0	0	1	0	0	0	0	0	2.1316	0	0.333333333	0	0.333333333	0	0	0	1	0
673	7.237346755	5	32	1	0	1	0	0	1	0	0	0	0	0	0.2116	0	0.4	0	0.2	0	0	0	1	0
674	7.534035897	5	40	3	0	1	0	0	1	0	0	0	0	0	0.2116	0	0.4	0	0	0	0	0.2	1	0
675	7.700770419	7	63	4	0	1	0	0	0	0	0	0	0	0	6.0516	0	0.428571429	0.285714286	0.142857143	0	0	0	1	0
676	7.390483852	3	68	3	0	1	0	0	1	0	0	0	0	0	2.3716	0	0.666666667	0.333333333	0	0	0	0	1	0
677	7.300418795	5	37	2	0	1	0	0	1	0	0	0	0	0	0.2116	0	0.4	0	0.2	0	0	0	1	0
678	7.799958215	3	43	1	0	0	0	0	1	0	0	0	0	0	2.3716	0	0.666666667	0	0	0	0	0	1	0
679	7.147622212	5	34	3	0	0	1	0	1	0	0	0	0	0	0.2116	0	0.2	0	0.2	0	0	0	1	0
680	7.58206107	5	35	2	0	1	0	0	1	0	0	0	0	0	0.2116	0	0.4	0	0	0	0.2	0.2	1	0
681	7.948879688	4	32	2	1	0	0	0	1	0	0	0	0	0	0.2916	4	0.5	0	0.25	0	0	0	1	0
682	7.480625692	4	35	2	1	1	0	0	1	0	0	0	0	0	0.2916	4	0.5	0	0.25	0	0	0	1	0
683	8.003413208	6	63	3	1	1	0	0	1	0	0	0	0	0	2.1316	6	0.5	0.166666667	0	0	0.166666667	0.166666667	1	0
684	7.602361395	4	25	3	1	0	0	0	1	0	0	1	0	0	0.2916	4	0.5	0	0.25	0.25	0	0	1	0
685	7.988481902	6	44	3	1	1	0	0	1	0	0	0	0	1	2.1316	6	0.333333333	0.166666667	0	0	0	0.166666667	1	0
686	7.763395389	4	29	2	1	0	0	0	1	0	0	0	1	0	0.2916	4	0.25	0	0.25	0	0	0.25	1	0
687	8.039844251	6	48	2	1	0	0	0	1	0	0	0	0	0	2.1316	6	0.333333333	0	0	0	0.333333333	0.166666667	1	0
688	7.951738892	8	45	3	1	1	0	0	1	0	0	0	0	0	11.9716	8	0.625	0	0	0	0.125	0	1	0
689	7.432696803	4	35	2	1	1	0	0	1	0	0	0	0	1	0.2916	4	0.5	0	0	0.25	0	0.25	1	0
690	8.095687112	1	97	1	1	0	1	0	1	0	0	0	0	0	12.5316	1	0	1	0	0	0	0	1	0
691	8.095824286	3	45	2	1	1	0	0	1	0	0	0	0	0	2.3716	3	0.666666667	0	0	0	0.333333333	0	1	0
692	7.822604973	4	26	2	1	0	0	0	1	0	0	0	0	1	0.2916	4	0.25	0.25	0	0.25	0	0	1	0
693	7.956112331	6	60	2	1	1	0	0	1	0	0	0	1	0	2.1316	6	0.333333333	0.166666667	0.166666667	0	0	0.333333333	1	0
694	7.66129176	4	35	1	1	0	0	0	1	0	0	0	0	0	0.2916	4	0.5	0	0.25	0	0	0	1	0
695	7.793743492	2	40	2	1	1	1	0	1	0	0	0	0	0	6.4516	2	1	0	0	0	0	0	1	0
696	8.285210691	4	55	3	1	1	0	0	1	0	0	0	0	0	0.2916	4	1	0	0	0	0	0	1	0
697	7.818852548	5	41	6	1	1	0	0	1	0	0	0	0	1	0.2116	5	0.4	0.2	0.2	0	0.2	0	1	0
698	7.32334892	5	42	2	1	1	0	0	1	0	0	0	0	0	0.2116	5	0.6	0	0	0	0.2	0	1	0
699	7.649840232	4	33	3	1	1	0	0	1	0	0	0	0	0	0.2916	4	0.5	0	0.25	0	0	0	1	0
700	7.707489722	3	21	2	1	0	0	0	1	0	0	0	0	0	2.3716	3	0.333333333	0.333333333	0.333333333	0	0	0	1	0
701	8.407844734	2	86	1	1	0	1	0	1	0	0	0	0	0	6.4516	2	0.5	0.5	0	0	0	0	1	0
702	7.884922836	4	68	3	1	1	0	0	1	0	0	0	0	0	0.2916	4	0.5	0.25	0	0	0	0	1	0
703	7.6494545	6	56	5	1	1	0	0	1	0	0	0	1	0	2.1316	6	0.666666667	0	0	0	0.166666667	0	1	0
704	7.796637814	7	62	3	1	0	0	0	1	0	0	0	0	0	6.0516	7	0.571428571	0.142857143	0.142857143	0	0.142857143	0	1	0
705	8.009921246	3	25	2	1	1	0	0	1	0	0	0	0	0	2.3716	3	0.666666667	0	0.333333333	0	0	0	1	0
706	8.08165746	6	40	4	1	1	0	0	1	0	0	0	0	0	2.1316	6	0.5	0	0	0	0	0.166666667	1	0
707	7.961976712	6	76	4	1	1	0	0	1	0	0	0	0	0	2.1316	6	0.5	0.333333333	0	0	0	0	1	0
708	7.69761166	5	49	2	1	1	0	0	1	0	0	0	0	0	0.2116	5	0.4	0	0	0.2	0	0	1	0
709	7.683735118	10	60	3	1	0	0	0	1	0	0	0	0	0	29.8116	10	0.7	0.2	0.1	0	0	0.1	1	0
710	8.179457757	7	81	4	1	0	0	0	1	0	0	0	1	0	6.0516	7	0.428571429	0.285714286	0.142857143	0	0	0	1	0
711	7.860586212	6	38	2	1	1	0	0	1	0	0	0	0	0	2.1316	6	0.333333333	0	0.166666667	0	0	0.166666667	1	0
712	8.262440287	3	25	2	1	1	0	0	1	0	0	0	0	0	2.3716	3	0.666666667	0	0	0	0	0	1	0
713	7.711625073	5	42	3	1	1	0	0	1	0	0	0	0	0	0.2116	5	0.6	0	0	0	0.2	0.2	1	0
714	8.211276542	3	61	2	1	0	0	0	1	0	0	0	0	0	2.3716	3	0.666666667	0.333333333	0	0	0	0	1	0
715	8.029878995	4	40	1	1	1	0	0	1	0	0	0	0	1	0.2916	4	0.5	0	0	0	0	0.5	1	0
716	7.795510725	6	39	1	1	1	0	0	1	0	0	0	0	0	2.1316	6	0.333333333	0	0.166666667	0	0.166666667	0	1	0
717	7.733482149	7	48	3	1	1	0	0	1	0	0	0	0	0	6.0516	7	0.714285714	0	0	0	0	0.142857143	1	0
718	7.713480863	5	39	3	1	1	0	0	1	0	0	0	0	0	0.2116	5	0.4	0	0	0	0.2	0	1	0
719	8.382532018	1	68	1	1	0	1	0	1	0	0	0	0	0	12.5316	1	0	1	0	0	0	0	1	0
720	7.858389465	6	76	3	1	0	0	0	1	0	0	0	0	0	2.1316	6	0.333333333	0.333333333	0.166666667	0	0	0	1	0
721	7.521420844	5	33	2	1	1	0	0	1	0	0	0	0	0	0.2116	5	0.4	0	0.4	0	0	0	1	0
722	7.766582139	2	65	5	1	0	0	0	1	0	0	0	0	0	6.4516	2	0.5	0.5	0	0	0	0	1	0
723	7.400339536	4	30	1	1	1	0	0	0	0	0	0	1	0	0.2916	4	0.5	0	0.5	0	0	0	1	0
724	7.524782465	4	30	2	1	0	0	0	1	0	0	0	0	0	0.2916	4	0.25	0	0	0	0.5	0	1	0
725	7.645407264	7	38	3	1	1	0	0	1	0	0	0	1	0	6.0516	7	0.428571429	0	0.142857143	0	0	0.142857143	1	0
726	7.641862045	5	35	1	1	0	0	0	1	0	0	0	0	0	0.2116	5	0.6	0.2	0	0	0	0.2	1	0
727	7.979602559	4	31	2	1	1	0	0	1	0	0	0	0	0	0.2916	4	0.5	0	0	0	0	0.25	1	0
728	7.547058547	3	39	4	1	0	0	0	1	0	0	0	0	0	2.3716	3	0.666666667	0.333333333	0	0	0	0.333333333	1	0
729	7.499528432	5	46	4	1	0	0	0	1	0	0	0	0	0	0.2116	5	0.4	0	0	0.2	0	0.2	1	0
730	7.647790816	10	48	6	1	1	0	0	1	0	0	0	0	0	29.8116	10	0.6	0	0.1	0.1	0	0.1	1	0
731	7.878583437	5	36	4	1	1	0	0	1	0	0	0	0	0	0.2116	5	0.4	0.2	0.2	0	0	0	1	0
732	7.280435453	6	30	2	1	1	0	0	1	0	0	0	0	0	2.1316	6	0.5	0	0.333333333	0	0	0	1	0
733	7.849608489	3	48	1	1	1	0	0	1	0	0	0	0	0	2.3716	3	0.666666667	0	0	0	0	0	1	0
734	7.567816093	10	65	4	1	1	0	0	1	0	0	0	1	0	29.8116	10	0.5	0.1	0.1	0.1	0	0.1	1	0
735	7.842954121	4	32	3	1	1	0	0	1	0	0	0	0	1	0.2916	4	0.5	0.25	0.25	0	0	0	1	0
736	7.593938266	4	41	3	1	1	0	0	1	0	0	0	1	0	0.2916	4	0.5	0	0	0	0	0.25	1	0
737	7.563766372	8	40	3	1	1	0	0	1	0	0	0	0	0	11.9716	8	0.375	0	0.125	0	0	0	1	0
738	7.50079479	4	52	1	1	1	0	0	1	0	0	0	0	0	0.2916	4	0.5	0	0	0	0	0	1	0
739	7.679075729	5	41	3	1	1	0	0	1	0	0	0	0	0	0.2116	5	0.4	0	0	0	0	0	1	0
740	7.521177201	4	70	4	1	0	0	0	1	0	0	0	0	0	0.2916	4	0.25	0.5	0	0	0	0	1	0
741	7.713194894	5	66	3	1	1	0	0	1	0	0	0	0	0	0.2116	5	0.6	0.2	0	0.2	0	0	1	0
742	7.456050083	5	36	3	1	1	0	0	1	0	0	0	0	0	0.2116	5	0.4	0	0.2	0	0.2	0	1	0
743	7.26325253	3	22	3	1	1	0	0	1	0	0	0	0	0	2.3716	3	0.666666667	0	0.333333333	0	0	0	1	0
744	7.815102133	6	62	3	1	0	0	0	1	0	0	1	1	0	2.1316	6	0.666666667	0.166666667	0	0.166666667	0	0	1	0
745	7.870185045	4	47	4	1	1	0	0	0	1	0	0	0	0	0.2916	4	0.75	0	0	0	0	0.25	1	0
746	7.53171314	5	51	4	1	1	0	0	1	0	0	0	0	0	0.2116	5	0.8	0	0	0	0	0	1	0
747	7.799638558	4	37	3	1	1	0	0	1	0	0	0	1	0	0.2916	4	0.5	0	0	0	0.25	0	1	0
748	7.511437165	5	48	3	1	1	0	0	1	0	0	0	0	1	0.2116	5	0.6	0	0	0	0	0.2	1	0
749	7.803022559	3	43	2	1	1	0	0	1	0	0	0	0	0	2.3716	3	0.666666667	0	0	0	0	0.333333333	1	0
750	7.349603745	5	38	3	1	1	0	0	1	0	0	0	0	1	0.2116	5	0.4	0	0	0.2	0.2	0	1	0
751	7.793186723	4	56	3	1	1	0	0	1	0	0	0	0	0	0.2916	4	0.75	0	0	0	0.25	0	1	0
752	7.392468933	3	27	3	1	1	0	0	1	0	0	0	1	0	2.3716	3	0.666666667	0	0.333333333	0	0	0	1	0
753	7.697965647	6	35	3	1	1	0	0	1	0	0	0	0	0	2.1316	6	0.333333333	0	0.166666667	0	0	0	1	0
754	7.438001104	6	45	2	1	1	0	0	1	0	0	0	0	0	2.1316	6	0.333333333	0.333333333	0	0	0	0.166666667	1	0
755	7.535003013	2	43	1	1	1	1	0	0	0	0	0	0	0	6.4516	2	0.5	0	0	0	0	0	1	0
756	7.596211474	4	47	3	1	1	0	0	1	0	0	0	0	0	0.2916	4	0.5	0	0.25	0	0	0.25	1	0
757	7.786265221	3	55	3	1	0	1	0	1	0	0	0	0	0	2.3716	3	1	0	0	0	0	0	1	0
758	7.531370157	2	65	4	1	1	0	0	1	0	0	0	0	0	6.4516	2	0	1	0	0	0	0	1	0
759	7.268543751	4	24	1	1	1	0	0	1	0	0	0	0	0	0.2916	4	0.5	0	0.25	0.25	0	0	1	0
760	7.471579343	5	30	3	1	1	0	0	0	1	0	0	1	0	0.2116	5	0.4	0.2	0	0.2	0	0	1	0
761	7.525089959	7	34	3	1	1	0	0	1	0	0	0	0	0	6.0516	7	0.285714286	0.142857143	0.142857143	0.142857143	0	0	1	0
762	7.590655135	4	32	2	1	1	0	0	1	0	0	0	1	0	0.2916	4	0.5	0	0	0	0	0	1	0
763	7.561995297	5	32	3	1	1	0	0	1	0	0	0	0	0	0.2116	5	0.4	0	0.2	0	0	0	1	0
764	7.487039231	7	41	2	1	1	0	0	1	0	0	0	0	0	6.0516	7	0.428571429	0.142857143	0	0	0.142857143	0	1	0
765	7.663158691	3	24	3	1	1	0	0	1	0	0	0	0	0	2.3716	3	0.666666667	0	0.333333333	0	0	0	1	0
766	7.620415829	4	34	2	1	1	0	0	1	0	0	0	0	0	0.2916	4	0.5	0	0	0	0.25	0	1	0
767	7.491238252	5	51	3	1	1	0	0	1	0	0	0	0	0	0.2116	5	0.6	0	0.2	0	0.2	0	1	0
768	7.518330306	3	29	5	1	1	0	0	1	0	0	0	0	1	2.3716	3	0.666666667	0	0.333333333	0	0	0	1	0
769	7.595457664	5	37	3	1	1	0	0	1	0	0	0	0	0	0.2116	5	0.4	0	0.2	0	0	0	1	0
770	7.652991937	4	29	2	1	1	0	0	1	0	0	0	0	1	0.2916	4	0.5	0.25	0.25	0	0	0	1	0
771	8.330024707	2	39	3	1	1	0	0	1	0	0	0	0	0	6.4516	2	1	0	0	0	0	0	1	0
772	7.498060991	3	31	2	1	1	0	0	1	0	0	0	0	0	2.3716	3	0.666666667	0	0.333333333	0	0	0	1	0
773	7.816864284	5	62	5	1	1	0	0	1	0	0	0	1	0	0.2116	5	0.2	0.2	0	0	0	0	1	0
774	7.595729101	3	38	1	1	1	0	0	1	0	0	0	1	0	2.3716	3	0.666666667	0	0.333333333	0	0	0	1	0
775	7.534500871	4	28	3	1	1	0	0	1	0	0	0	0	0	0.2916	4	0.5	0	0.25	0	0	0	1	0
776	7.498642687	3	30	3	1	0	0	0	1	0	0	0	1	0	2.3716	3	0.333333333	0	0	0	0	0.333333333	1	0
777	8.130053149	6	69	4	1	1	0	0	1	0	0	0	1	0	2.1316	6	0.5	0.166666667	0.166666667	0.166666667	0	0	1	0
778	7.720182152	3	61	6	1	0	0	0	1	0	0	1	0	1	2.3716	3	0.666666667	0.333333333	0	0	0	0	1	0
779	7.743516852	5	35	3	1	1	0	0	1	0	0	0	0	0	0.2116	5	0.6	0	0.2	0	0.2	0	1	0
780	7.543315719	5	35	3	1	1	0	0	1	0	0	0	0	0	0.2116	5	0.6	0	0.4	0	0	0	1	0
781	7.895074675	4	66	3	1	1	0	0	1	0	0	0	1	0	0.2916	4	0.75	0.25	0	0	0	0	1	0
782	7.675634166	3	20	4	1	0	0	0	1	0	0	0	0	1	2.3716	3	0.666666667	0	0	0	0	0	1	0
783	7.464228993	6	58	4	1	1	0	0	1	0	0	0	0	0	2.1316	6	0.333333333	0	0.166666667	0	0.166666667	0.166666667	1	0
784	7.67141218	3	38	3	1	1	0	0	1	0	0	0	0	0	2.3716	3	0.666666667	0	0	0	0	0	1	0
785	7.592013066	4	35	3	1	1	0	0	1	0	0	0	0	0	0.2916	4	0.5	0	0	0	0	0	1	0
786	7.80928967	4	34	3	1	1	0	0	1	0	0	0	0	0	0.2916	4	0.5	0	0	0	0	0	1	0
787	7.607182697	4	63	4	1	1	0	0	1	0	0	0	0	0	0.2916	4	0.5	0.25	0	0	0.25	0	1	0
788	7.609792823	8	56	3	1	1	0	0	1	0	0	0	0	0	11.9716	8	0.625	0.125	0.125	0	0	0.125	1	0
789	7.721893677	5	49	5	1	1	0	0	1	0	0	0	0	1	0.2116	5	0.6	0	0	0	0.2	0	1	0
790	7.327662266	4	30	3	1	1	0	0	1	0	0	0	1	0	0.2916	4	0.75	0	0.25	0	0	0	1	0
791	7.556177023	6	40	3	1	1	0	0	1	0	1	0	0	0	2.1316	6	0.333333333	0.166666667	0	0.166666667	0	0	1	0
792	7.487274529	6	50	6	1	1	0	0	1	0	0	0	0	0	2.1316	6	0.833333333	0	0	0	0.166666667	0	1	0
793	7.910326454	3	31	3	1	1	0	0	1	0	0	0	1	0	2.3716	3	0.666666667	0.333333333	0	0	0	0	1	0
794	7.512923342	4	55	4	1	0	0	0	1	0	0	0	0	0	0.2916	4	0.5	0	0	0	0	0	1	0
795	7.903751431	6	51	3	1	1	0	0	1	0	0	0	0	0	2.1316	6	0.666666667	0	0	0	0	0.333333333	1	0
796	7.099548504	6	69	2	1	0	0	0	1	0	0	0	0	0	2.1316	6	0.333333333	0.333333333	0.166666667	0.166666667	0	0	1	0
797	7.584920424	3	43	3	1	1	0	0	1	0	0	0	1	0	2.3716	3	0.666666667	0	0.333333333	0	0	0	1	0
798	7.733644165	1	65	2	1	0	1	0	1	0	0	0	0	0	12.5316	1	0	1	0	0	0	0	1	0
799	7.633553563	7	28	3	1	1	0	0	1	0	0	0	0	0	6.0516	7	0.285714286	0.142857143	0.142857143	0	0	0	1	0
800	7.840194913	2	61	3	1	1	0	0	1	0	0	0	0	0	6.4516	2	0.5	0.5	0	0	0	0	1	0
801	8.246035175	2	31	4	0	1	0	0	1	0	0	0	0	1	6.4516	0	1	0	0	0	0	0	1	0
802	7.738056657	3	39	3	0	1	0	0	0	1	1	0	0	1	2.3716	0	1	0	0	0	0.333333333	0	1	0
803	7.820319074	2	71	2	0	1	0	0	1	0	0	0	0	0	6.4516	0	0	1	0	0	0	0	1	0
804	7.544501406	4	45	3	0	1	0	0	0	1	0	0	0	0	0.2916	0	0.75	0	0	0	0	0.25	1	0
805	7.753928221	2	58	3	0	1	0	0	0	1	0	0	0	1	6.4516	0	1	0	0	0	0	0	1	0
806	7.710169335	4	28	3	0	1	0	0	0	1	0	0	0	1	0.2916	0	0.5	0	0	0.25	0	0	1	0
807	7.694105876	4	48	5	0	1	0	0	1	0	0	1	0	1	0.2916	0	0.5	0	0	0	0	0.25	1	0
808	7.524496464	3	39	3	0	1	0	0	1	0	0	0	0	1	2.3716	0	0.666666667	0	0	0	0	0	1	0
809	7.917612854	3	52	3	0	1	0	0	1	0	0	0	0	0	2.3716	0	0.666666667	0	0	0	0	0	1	0
810	7.508205861	6	37	4	0	1	0	0	0	1	0	0	0	1	2.1316	0	0.666666667	0	0.166666667	0	0	0	1	0
811	7.52425357	4	22	2	0	1	0	0	1	0	0	0	0	1	0.2916	0	0.75	0	0	0	0.25	0	1	0
812	7.587660166	5	47	2	0	1	0	0	0	0	1	0	0	0	0.2116	0	0.6	0	0	0	0	0.4	1	0
813	7.324443835	3	26	1	0	1	0	0	1	0	0	0	1	0	2.3716	0	0.666666667	0	0.333333333	0	0	0	1	0
814	7.919876056	1	50	4	0	0	1	0	1	0	1	0	0	1	12.5316	0	1	0	0	0	0	0	1	0
815	7.959562432	3	42	1	0	1	0	0	0	0	0	0	1	0	2.3716	0	0.666666667	0	0	0	0	0.333333333	1	0
816	7.764610182	5	60	3	0	0	0	0	1	0	0	0	0	1	0.2116	0	0.8	0.2	0	0	0	0	1	0
817	7.547211556	5	54	7	0	1	0	0	1	0	0	0	0	1	0.2116	0	0.6	0	0	0	0.2	0	1	0
818	7.715631949	4	47	3	0	1	0	0	1	0	0	0	0	0	0.2916	0	0.75	0	0	0	0	0	1	0
819	7.588303424	3	30	6	0	0	0	0	1	0	0	0	1	0	2.3716	0	0.333333333	0	0	0	0	0.333333333	1	0
820	7.726314101	4	39	4	0	0	0	0	1	0	0	1	0	0	0.2916	0	0.5	0	0	0	0.25	0	1	0
821	7.539999987	3	42	2	0	0	1	0	1	0	0	1	1	0	2.3716	0	0.666666667	0	0.333333333	0	0	0	1	0
822	7.390465339	4	38	2	0	1	0	0	1	0	0	0	0	1	0.2916	0	0.5	0	0.25	0	0	0	1	0
823	7.72556842	1	54	2	0	0	1	0	1	0	0	0	0	0	12.5316	0	1	0	0	0	0	0	1	0
824	7.744036969	4	32	3	0	1	0	0	0	1	0	0	1	0	0.2916	0	0.5	0	0.25	0	0	0.25	1	0
825	7.61630818	7	64	3	0	0	0	0	1	0	0	1	0	1	6.0516	0	0.428571429	0.285714286	0	0	0.142857143	0.142857143	1	0
826	7.56730431	5	41	4	0	1	0	0	0	1	0	0	0	1	0.2116	0	0.4	0	0.2	0	0.2	0	1	0
827	7.747942202	3	36	2	0	1	0	0	0	1	0	0	0	1	2.3716	0	0.666666667	0	0	0	0	0	1	0
828	7.65025913	7	68	3	0	1	1	0	0	1	0	0	0	0	6.0516	0	0.571428571	0.142857143	0	0	0	0	1	0
829	6.928528024	3	44	4	0	1	0	0	1	0	0	0	0	1	2.3716	0	0.666666667	0	0	0	0.333333333	0	1	0
830	7.50092189	4	32	3	0	1	0	0	0	1	0	1	0	1	0.2916	0	0.5	0	0.25	0.25	0	0	1	0
831	7.503333731	5	28	3	0	1	0	0	0	1	0	0	0	0	0.2116	0	0.6	0	0.2	0	0	0	1	0
832	7.577470053	3	27	3	0	1	0	0	0	1	0	0	0	0	2.3716	0	0.666666667	0	0	0	0	0	1	0
833	7.643262471	3	44	5	0	1	0	0	1	0	0	0	0	1	2.3716	0	0.666666667	0	0	0	0	0	1	0
834	7.533672319	3	25	2	0	1	0	0	0	1	0	0	0	1	2.3716	0	0.666666667	0	0.333333333	0	0	0	1	0
835	7.503063585	4	26	2	0	1	0	0	0	1	0	0	0	1	0.2916	0	0.75	0	0	0	0	0	1	0
836	7.818683659	2	23	2	0	1	0	0	0	1	0	0	0	1	6.4516	0	1	0	0	0	0	0	1	0
837	7.47772867	7	41	3	0	1	0	0	1	0	0	0	0	1	6.0516	0	0.714285714	0	0.142857143	0	0	0	1	0
838	7.872657111	3	53	3	0	0	0	0	1	0	0	1	0	1	2.3716	0	0.666666667	0	0	0	0	0	1	0
839	7.408203241	4	47	2	0	1	0	0	0	1	1	0	0	1	0.2916	0	0.75	0	0	0	0.25	0	1	0
840	7.765598767	2	48	3	0	1	0	0	0	1	1	0	0	1	6.4516	0	1	0	0	0	0	0	1	0
841	7.563055203	5	30	3	1	1	0	0	1	0	0	0	0	0	0.2116	5	0.6	0	0	0	0	0.4	1	0
842	7.633684218	6	36	1	1	1	0	0	1	0	0	0	0	1	2.1316	6	0.333333333	0.166666667	0.166666667	0	0	0	1	0
843	7.724225676	3	40	2	1	1	1	0	1	0	0	0	0	0	2.3716	3	1	0	0	0	0	0	1	0
844	7.748964642	3	70	3	1	1	0	0	1	0	0	0	0	0	2.3716	3	0.333333333	0.666666667	0	0	0	0	1	0
845	7.673069621	2	42	5	1	1	0	0	1	0	0	0	0	0	6.4516	2	1	0	0	0	0	0	1	0
846	7.264660196	5	28	2	1	1	0	0	0	0	0	0	0	0	0.2116	5	0.4	0	0.2	0	0	0	1	0
847	7.506569802	5	53	3	1	1	0	0	1	0	0	0	0	0	0.2116	5	0.4	0	0.2	0	0	0	1	0
848	7.612455466	8	45	4	1	0	0	0	1	0	0	0	1	0	11.9716	8	0.375	0	0	0	0.125	0.125	1	0
849	7.795856391	3	40	4	1	0	0	0	1	0	0	0	0	0	2.3716	3	0.333333333	0.333333333	0	0	0.333333333	0	1	0
850	7.931256015	2	51	3	1	1	0	0	1	0	0	0	0	0	6.4516	2	1	0	0	0	0	0	1	0
851	7.748015577	2	80	1	1	1	0	0	1	0	0	0	0	0	6.4516	2	0	1	0	0	0	0	1	0
852	8.102998088	4	31	3	1	0	0	0	1	0	0	0	0	0	0.2916	4	0.25	0.25	0	0	0.25	0.25	1	0
853	7.597576936	6	72	3	1	0	0	0	1	0	0	0	1	0	2.1316	6	0.166666667	0.166666667	0	0	0.166666667	0	1	0
854	7.406953567	6	35	3	1	1	0	0	1	0	0	0	0	1	2.1316	6	0.333333333	0	0.166666667	0.166666667	0	0	1	0
855	7.568022799	4	27	3	1	1	0	0	1	0	0	0	0	0	0.2916	4	0.5	0	0.5	0	0	0	1	0
856	7.671789536	5	40	2	1	1	0	0	1	0	0	0	1	0	0.2116	5	0.4	0	0.2	0	0	0.2	1	0
857	7.616460798	3	42	3	1	1	0	0	1	0	0	0	0	0	2.3716	3	0.666666667	0	0	0	0	0	1	0
858	7.62049428	4	65	2	1	1	0	0	1	0	0	0	1	0	0.2916	4	0.25	0.25	0	0	0.25	0	1	0
859	7.481065441	3	42	1	1	1	0	0	1	0	0	0	0	0	2.3716	3	0.666666667	0	0	0	0	0	1	0
860	7.610298181	5	52	5	1	1	0	0	1	0	0	0	0	1	0.2116	5	0.4	0	0	0	0.2	0	1	0
861	7.671449456	1	47	3	1	0	1	0	1	0	0	0	1	0	12.5316	1	1	0	0	0	0	0	1	0
862	7.780862898	3	50	4	1	1	0	0	1	0	0	0	0	1	2.3716	3	0.666666667	0	0	0	0	0.333333333	1	0
863	7.446194124	1	47	3	1	0	1	0	1	0	0	0	0	0	12.5316	1	1	0	0	0	0	0	1	0
864	7.46346631	9	60	2	1	1	0	0	1	0	0	0	0	0	19.8916	9	0.555555556	0.111111111	0	0	0.333333333	0	1	0
865	7.553989033	6	56	4	1	1	0	0	1	0	0	0	0	1	2.1316	6	0.5	0.166666667	0.166666667	0	0.166666667	0	1	0
866	7.799831184	2	55	4	1	0	1	0	1	0	0	0	0	0	6.4516	2	1	0	0	0	0	0	1	0
867	7.410843043	5	65	4	1	1	0	0	1	0	0	0	0	1	0.2116	5	0.6	0.2	0	0	0	0	1	0
868	7.760074795	3	49	6	1	1	0	0	1	0	1	0	0	1	2.3716	3	0.666666667	0	0	0	0	0.333333333	1	0
869	7.716073197	5	61	4	1	0	0	0	1	0	0	0	0	0	0.2116	5	0.6	0.2	0	0	0	0	1	0
870	7.508847476	7	49	3	1	1	0	0	1	0	0	0	0	0	6.0516	7	0.428571429	0	0.142857143	0	0.142857143	0	1	0
871	7.912573238	4	61	3	1	0	0	0	1	0	0	1	0	0	0.2916	4	0.25	0.25	0	0	0.25	0	1	0
872	7.912510998	4	55	3	1	1	0	0	1	0	0	0	0	0	0.2916	4	1	0	0	0	0	0	1	0
873	7.223769674	4	35	1	1	1	0	0	1	0	0	0	0	0	0.2916	4	0.5	0	0	0.25	0	0	1	0
874	7.474913976	4	30	2	1	1	0	0	1	0	0	0	0	0	0.2916	4	0.5	0	0.25	0	0	0	1	0
875	7.519990624	5	38	3	1	1	0	0	1	0	0	0	0	0	0.2116	5	0.6	0	0.2	0	0.2	0	1	0
876	6.703776897	4	40	3	1	0	0	0	1	0	0	0	0	0	0.2916	4	0.75	0	0.25	0	0	0	1	0
877	7.613211393	5	70	4	1	0	0	0	1	0	0	0	0	0	0.2116	5	0.8	0.2	0	0	0	0	1	0
878	7.675207198	2	60	4	1	1	0	0	1	0	0	0	0	1	6.4516	2	0.5	0.5	0	0	0	0	1	0
879	7.358161885	3	28	2	1	1	0	0	1	0	0	0	0	0	2.3716	3	0.666666667	0	0.333333333	0	0	0	1	0
880	7.511021515	4	58	3	1	1	0	0	1	0	0	0	0	0	0.2916	4	0.75	0	0	0	0	0	1	0
881	7.823157616	3	45	3	1	0	1	0	1	0	0	0	1	0	2.3716	3	0.666666667	0.333333333	0	0	0	0	1	0
882	7.512470073	8	53	4	1	1	0	0	1	0	0	0	1	0	11.9716	8	0.625	0	0.125	0	0	0.125	1	0
883	7.704793897	5	45	3	1	1	0	0	1	0	0	0	1	0	0.2116	5	0.4	0	0	0.2	0.2	0	1	0
884	7.747113129	3	35	2	1	0	0	0	1	0	0	0	1	0	2.3716	3	0.333333333	0	0	0	0.333333333	0	1	0
885	7.631203705	4	30	2	1	1	0	0	0	0	0	0	1	0	0.2916	4	0.5	0	0	0.25	0	0	1	0
886	7.682639116	6	52	4	1	1	0	0	1	0	0	0	1	0	2.1316	6	0.666666667	0	0	0	0.166666667	0	1	0
887	7.525030625	4	27	3	1	1	0	0	1	0	0	0	0	0	0.2916	4	0.5	0	0.5	0	0	0	1	0
888	7.485974095	6	45	4	1	1	0	0	1	0	0	0	0	1	2.1316	6	0.333333333	0	0.166666667	0.166666667	0.166666667	0	1	0
889	7.502192005	4	60	3	1	0	0	0	1	0	0	0	0	1	0.2916	4	0.5	0.25	0	0	0	0	1	0
890	7.839328634	2	74	2	1	1	0	0	1	0	0	0	0	0	6.4516	2	0.5	0.5	0	0	0	0	1	0
891	7.454482653	4	30	2	1	1	0	0	1	0	0	0	0	0	0.2916	4	0.5	0	0.25	0.25	0	0	1	0
892	7.513894719	7	65	2	1	1	0	0	1	0	0	0	0	0	6.0516	7	0.285714286	0.142857143	0	0	0.142857143	0	1	0
893	7.851984083	2	67	3	1	1	0	0	1	0	0	0	0	0	6.4516	2	0.5	0.5	0	0	0	0	1	0
894	7.541253299	4	55	4	1	1	0	0	1	0	0	0	0	1	0.2916	4	0.75	0.25	0	0	0	0	1	0
895	7.69584439	5	51	5	1	0	0	0	1	0	0	0	0	0	0.2116	5	0.8	0	0.2	0	0	0	1	0
896	8.005056709	3	60	4	1	1	0	0	1	0	0	1	0	0	2.3716	3	0.666666667	0.333333333	0	0	0	0	1	0
897	7.806057178	5	46	3	1	1	0	0	1	0	0	0	0	0	0.2116	5	0.8	0	0	0	0.2	0	1	0
898	7.533362104	6	55	4	1	1	0	0	1	0	0	0	0	0	2.1316	6	0.666666667	0	0	0	0.166666667	0	1	0
899	7.737725304	3	60	1	1	1	0	0	1	0	0	0	0	0	2.3716	3	0.333333333	0.333333333	0	0	0	0	1	0
900	7.280166752	4	29	3	1	1	0	0	1	0	0	0	0	0	0.2916	4	0.5	0	0.25	0	0	0	1	0
901	7.606223279	4	38	2	1	1	0	0	0	1	0	0	1	0	0.2916	4	0.5	0	0	0	0	0	1	0
902	7.773964613	1	28	2	1	1	0	0	0	1	1	0	0	1	12.5316	1	1	0	0	0	0	0	1	0
903	7.663947679	4	30	2	1	1	0	0	0	1	0	0	0	1	0.2916	4	0.75	0	0.25	0	0	0	1	0
904	7.919087064	2	69	5	1	0	0	0	1	0	0	1	0	1	6.4516	2	0.5	0.5	0	0	0	0	1	0
905	7.44206498	6	65	4	1	1	0	0	1	0	0	0	0	0	2.1316	6	0.666666667	0.333333333	0	0	0	0	1	0
906	7.590008333	5	60	3	1	1	0	0	1	0	0	1	0	1	0.2116	5	0.8	0.2	0	0	0	0	1	0
907	7.389736885	6	55	3	1	1	0	0	1	0	0	0	1	0	2.1316	6	0.666666667	0	0.166666667	0	0	0	1	0
908	7.475220182	4	35	2	1	1	1	0	1	0	0	0	1	0	0.2916	4	0.5	0	0	0	0	0	1	0
909	7.688670633	2	60	4	1	0	0	0	0	0	0	0	0	0	6.4516	2	0.5	0.5	0	0	0	0	1	0
910	7.168656936	6	32	1	1	1	0	0	1	0	0	1	0	0	2.1316	6	0.333333333	0	0.166666667	0.166666667	0	0	1	0
911	7.736617092	3	39	3	1	1	0	0	1	0	1	0	0	1	2.3716	3	0.666666667	0	0	0	0	0	1	0
912	7.932530841	4	45	4	1	1	0	0	0	1	0	0	0	1	0.2916	4	0.5	0.25	0	0	0	0	1	0
913	7.638164525	3	34	4	1	1	0	0	1	0	0	0	0	1	2.3716	3	0.666666667	0.333333333	0	0	0	0	1	0
914	7.581546333	6	38	6	1	1	0	0	0	1	0	0	0	1	2.1316	6	0.5	0	0	0	0.166666667	0	1	0
915	7.459880223	5	39	3	1	1	0	0	1	0	0	0	0	1	0.2116	5	0.6	0	0.2	0	0	0	1	0
916	7.87145999	2	68	3	1	1	0	0	1	0	0	0	0	1	6.4516	2	0	1	0	0	0	0	1	0
917	7.469431799	4	55	3	1	1	0	0	1	0	0	0	0	0	0.2916	4	0.75	0	0	0	0	0.25	1	0
918	7.809249074	8	61	2	1	1	0	0	0	1	0	0	0	0	11.9716	8	0.5	0.125	0	0	0	0	1	0
919	7.557457236	4	28	2	1	1	0	0	0	1	0	0	0	1	0.2916	4	0.5	0.25	0.25	0	0	0	1	0
920	7.498908493	7	47	1	1	1	0	0	1	0	0	1	0	0	6.0516	7	0.571428571	0	0.142857143	0	0.142857143	0.142857143	1	0
921	7.941516109	3	53	2	1	1	0	0	1	0	0	1	0	1	2.3716	3	0.666666667	0.333333333	0	0	0	0	1	0
922	7.836401368	3	47	4	1	0	1	0	1	0	0	0	0	1	2.3716	3	1	0	0	0	0	0	1	0
923	7.621753557	6	34	2	1	1	0	0	1	0	0	0	0	0	2.1316	6	0.666666667	0.166666667	0	0.166666667	0	0	1	0
924	7.623216636	5	55	3	1	1	0	0	1	0	0	0	1	0	0.2116	5	0.6	0	0	0	0.2	0	1	0
925	7.788020827	4	33	2	1	1	0	0	1	0	0	0	0	1	0.2916	4	0.75	0	0.25	0	0	0	1	0
926	7.653124822	5	43	2	1	1	0	0	1	0	0	0	0	1	0.2116	5	0.4	0.2	0.2	0.2	0	0	1	0
927	7.790584362	4	60	3	1	0	0	0	1	0	0	0	0	0	0.2916	4	0.75	0.25	0	0	0	0	1	0
928	7.805934992	4	34	3	1	1	0	0	1	0	0	0	0	1	0.2916	4	0.5	0	0.5	0	0	0	1	0
929	7.771345411	3	59	1	1	1	0	0	1	0	0	0	0	1	2.3716	3	1	0	0	0	0	0	1	0
930	7.979225875	4	63	3	1	1	0	0	1	0	0	0	0	0	0.2916	4	0.5	0.25	0	0	0	0.5	1	0
931	7.785009921	3	50	5	1	1	0	0	1	0	0	0	0	1	2.3716	3	0.666666667	0	0	0	0	0	1	0
932	7.728635826	4	30	2	1	1	0	0	1	0	0	0	0	0	0.2916	4	0.5	0.25	0.25	0	0	0	1	0
933	7.94611142	4	47	3	1	1	0	0	1	0	0	0	0	0	0.2916	4	0.75	0	0	0	0	0	1	0
934	7.88461416	2	61	3	1	1	0	0	1	0	0	0	0	0	6.4516	2	0.5	0.5	0	0	0	0	1	0
935	7.970083871	2	55	3	1	1	0	0	1	0	0	0	0	1	6.4516	2	1	0	0	0	0	0	1	0
936	7.568699465	6	35	3	1	1	0	0	1	0	0	0	0	0	2.1316	6	0.333333333	0.333333333	0	0	0	0.166666667	1	0
937	7.75329302	4	40	3	1	1	0	0	1	0	0	0	0	0	0.2916	4	0.5	0	0	0	0	0.25	1	0
938	7.911796781	7	75	4	1	0	0	0	1	0	0	0	0	0	6.0516	7	0.428571429	0.285714286	0	0	0	0.142857143	1	0
939	7.780608098	4	45	2	1	1	0	0	1	0	0	0	0	0	0.2916	4	0.75	0	0	0	0.25	0.25	1	0
940	7.800494847	1	62	4	1	0	1	0	1	0	0	0	0	1	12.5316	1	0	1	0	0	0	0	1	0
941	7.659793815	4	27	3	0	0	0	0	1	0	0	0	0	1	0.2916	0	0.25	0.25	0	0.25	0	0	1	0
942	7.54575966	7	45	3	0	1	0	0	1	0	0	0	0	0	6.0516	0	0.428571429	0.142857143	0	0	0	0	1	0
943	7.965493488	6	66	2	0	0	0	0	1	0	0	0	0	0	2.1316	0	0.666666667	0.166666667	0	0	0.166666667	0	1	0
944	7.414645168	7	47	3	0	1	0	0	1	0	0	0	0	0	6.0516	0	0.428571429	0.142857143	0	0	0.142857143	0	1	0
945	7.68673606	6	42	3	0	1	0	0	1	0	0	0	0	0	2.1316	0	0.333333333	0	0	0	0	0	1	0
946	7.660326361	5	35	5	0	1	0	0	1	0	0	0	1	0	0.2116	0	0.4	0.2	0.4	0	0	0	1	0
947	7.765581804	7	52	3	0	1	0	0	1	0	0	0	0	0	6.0516	0	0.428571429	0.142857143	0	0	0.142857143	0	1	0
948	7.482935032	6	52	4	0	1	0	0	1	0	0	0	0	0	2.1316	0	0.833333333	0	0	0.166666667	0	0	1	0
949	7.261779713	5	30	3	0	1	0	0	1	0	0	0	0	1	0.2116	0	0.4	0.2	0.2	0	0	0	1	0
950	7.440551766	3	46	1	0	1	0	0	1	0	0	1	0	0	2.3716	0	0.666666667	0	0.333333333	0	0	0	1	0
951	7.763514385	5	62	2	0	0	0	0	1	0	0	0	0	1	0.2116	0	0.6	0.2	0.2	0	0	0	1	0
952	7.380430337	6	30	3	0	1	0	0	1	0	0	0	0	0	2.1316	0	0.333333333	0	0.333333333	0	0	0	1	0
953	7.919017952	2	32	2	0	1	0	0	1	0	0	0	0	1	6.4516	0	1	0	0	0	0	0	1	0
954	7.848063273	3	71	4	0	1	0	0	1	0	0	0	0	1	2.3716	0	0.666666667	0.333333333	0	0	0	0	1	0
955	7.778324533	4	52	4	0	1	0	0	1	0	0	0	0	1	0.2916	0	0.5	0.25	0	0	0	0	1	0
956	7.845098837	2	46	3	0	0	1	0	1	0	0	0	0	0	6.4516	0	0.5	0	0	0	0	0.5	1	0
957	8.058688001	3	38	2	0	0	0	0	1	0	0	0	1	0	2.3716	0	0.333333333	0	0	0	0.333333333	0.333333333	1	0
958	7.616140765	5	42	4	0	1	0	0	1	0	0	0	0	0	0.2116	0	0.6	0	0	0	0.4	0	1	0
959	7.842506561	4	35	3	0	1	0	0	1	0	0	0	0	0	0.2916	0	0.5	0	0.25	0	0	0	1	0
960	7.434375509	3	28	4	0	1	0	0	1	0	0	0	1	0	2.3716	0	0.666666667	0	0.333333333	0	0	0	1	0
961	7.905559636	4	41	4	0	1	0	0	1	0	0	1	0	1	0.2916	0	0.5	0	0	0	0	0.25	1	0
962	7.497501135	5	35	3	0	1	0	0	1	0	0	0	0	1	0.2116	0	0.6	0	0.2	0	0	0	1	0
963	7.884911545	3	61	2	0	1	0	0	0	1	0	0	0	0	2.3716	0	0.333333333	0.666666667	0	0	0	0	1	0
964	7.656119546	3	37	4	0	1	0	0	1	0	0	0	0	0	2.3716	0	0.666666667	0	0	0	0	0	1	0
965	7.934079989	2	54	5	0	0	1	0	1	0	0	0	1	0	6.4516	0	1	0	0	0	0	0	1	0
966	7.687419548	6	55	4	0	0	0	0	1	0	0	0	1	0	2.1316	0	0.833333333	0	0	0	0	0	1	0
967	7.390199947	6	52	4	0	1	0	0	1	0	0	0	0	0	2.1316	0	0.833333333	0	0	0.166666667	0	0	1	0
968	7.981353987	3	54	2	0	1	0	0	1	0	0	0	1	0	2.3716	0	0.666666667	0	0	0	0.333333333	0	1	0
969	7.895465802	3	27	1	0	1	0	0	0	1	0	0	1	0	2.3716	0	0.666666667	0	0.333333333	0	0	0	1	0
970	7.31334038	5	35	2	0	1	0	0	0	1	0	0	1	0	0.2116	0	0.4	0	0.2	0	0	0	1	0
971	7.523843214	6	56	3	0	1	0	0	1	0	0	0	0	0	2.1316	0	0.5	0.166666667	0.333333333	0	0	0	1	0
972	7.304172915	8	40	3	0	1	0	0	1	0	0	0	1	0	11.9716	0	0.625	0.25	0.125	0	0	0	1	0
973	7.9189743	6	27	3	0	1	0	0	1	0	0	0	0	0	2.1316	0	0.5	0.166666667	0	0.166666667	0	0	1	0
974	7.746931678	3	30	3	0	1	0	0	1	0	0	0	1	0	2.3716	0	0.666666667	0	0	0	0	0	1	0
975	7.203903909	8	24	3	0	1	0	0	1	0	0	0	1	0	11.9716	0	0.5	0.125	0.125	0	0	0.125	1	0
976	7.829164887	1	60	2	0	0	1	0	1	0	0	0	0	0	12.5316	0	0	1	0	0	0	0	1	0
977	7.514336438	2	48	3	0	0	1	0	1	0	0	0	0	0	6.4516	0	1	0	0	0	0	0	1	0
978	7.17467071	9	50	2	0	1	0	0	1	0	0	0	0	0	19.8916	0	0.555555556	0.111111111	0.111111111	0.111111111	0.111111111	0	1	0
979	7.822248396	4	63	2	0	1	0	0	1	0	0	0	0	0	0.2916	0	0.5	0.25	0	0	0	0.25	1	0
980	7.38922418	5	40	2	0	1	0	0	1	0	0	0	0	0	0.2116	0	0.6	0	0	0	0.2	0	1	0
981	7.707894144	3	27	2	1	1	0	0	0	1	0	0	1	0	2.3716	3	0.666666667	0	0.333333333	0	0	0	0	0
982	7.830421643	5	45	3	1	1	0	0	1	0	0	0	0	0	0.2116	5	0.4	0	0.2	0.2	0	0	0	0
983	8.0490662	3	34	2	1	1	0	0	0	1	0	0	0	0	2.3716	3	0.666666667	0	0.333333333	0	0	0	0	0
984	8.791805222	1	22	2	1	1	0	0	0	0	0	0	0	0	12.5316	1	1	0	0	0	0	0	0	0
985	7.903714495	6	25	1	1	1	0	0	0	1	0	0	0	0	2.1316	6	0.5	0	0.333333333	0	0	0	0	0
986	8.181485462	6	41	2	1	1	0	0	1	0	0	0	0	0	2.1316	6	0.5	0	0.166666667	0	0	0	0	0
987	8.074001294	6	68	4	1	1	0	0	1	0	0	0	0	0	2.1316	6	0.5	0.166666667	0	0	0.166666667	0	0	0
988	7.837838456	3	30	2	1	1	0	0	1	0	0	0	0	0	2.3716	3	0.666666667	0	0.333333333	0	0	0	0	0
989	7.511070746	4	29	2	1	1	0	0	1	0	0	0	1	0	0.2916	4	0.5	0	0.5	0	0	0	0	0
990	8.050901066	5	25	4	1	1	0	0	1	0	0	0	1	0	0.2116	5	0.8	0	0	0	0	0	0	0
991	7.865855677	4	59	3	1	1	0	0	1	0	0	0	0	0	0.2916	4	0.5	0	0	0	0	0.25	0	0
992	8.218153532	3	25	1	1	1	0	0	1	0	0	0	0	0	2.3716	3	0.666666667	0	0	0.333333333	0	0	0	0
993	7.773177889	5	28	4	1	1	0	0	1	0	0	0	0	0	0.2116	5	0.4	0.2	0.2	0.2	0	0	0	0
994	7.574825389	4	28	2	1	1	0	0	1	0	0	0	0	0	0.2916	4	0.5	0	0.5	0	0	0	0	0
995	7.807595439	9	48	4	1	1	0	0	1	0	0	0	0	0	19.8916	9	0.444444444	0	0	0	0.111111111	0.111111111	0	0
996	7.839962666	7	30	5	1	1	0	0	1	0	0	0	1	0	6.0516	7	0.285714286	0.142857143	0.285714286	0	0	0.142857143	0	0
997	7.855385751	6	39	3	1	1	0	0	1	0	0	0	0	0	2.1316	6	0.333333333	0	0.166666667	0	0	0	0	0
998	8.137392906	3	26	3	1	1	0	0	1	0	0	0	0	0	2.3716	3	0.666666667	0	0	0.333333333	0	0	0	0
999	8.36011122	6	27	4	1	1	0	0	1	0	0	0	0	0	2.1316	6	0.833333333	0	0.166666667	0	0	0	0	0
1000	7.796937883	3	30	2	1	1	0	0	1	0	0	0	1	0	2.3716	3	0.333333333	0	0	0	0.333333333	0	0	0
1001	7.868751654	4	61	2	1	1	0	0	0	1	0	0	0	0	0.2916	4	0.25	0.25	0	0	0	0	0	0
1002	7.596819134	7	45	1	1	1	0	0	0	1	0	0	0	0	6.0516	7	0.571428571	0	0	0	0	0.142857143	0	0
1003	7.909368295	6	45	4	1	1	0	0	1	0	0	1	0	0	2.1316	6	0.666666667	0	0	0	0.166666667	0.166666667	0	0
1004	7.3067864	4	30	2	1	1	0	0	0	1	0	0	1	0	0.2916	4	0.5	0	0	0.25	0	0	0	0
1005	7.814641931	4	62	2	1	1	0	0	1	0	0	0	0	0	0.2916	4	0.5	0.25	0	0	0	0.25	0	0
1006	7.591240937	4	30	1	1	1	0	0	0	1	0	0	0	0	0.2916	4	0.25	0	0.5	0	0	0	0	0
1007	7.811264676	3	48	2	1	1	0	0	0	1	0	0	0	0	2.3716	3	0.666666667	0	0	0	0	0	0	0
1008	7.792307635	2	28	2	1	1	0	0	0	1	0	1	0	0	6.4516	2	1	0	0	0	0	0	0	0
1009	7.762634329	9	62	6	1	1	0	0	1	0	0	0	0	0	19.8916	9	0.666666667	0.111111111	0	0.111111111	0.111111111	0	0	0
1010	7.35781127	6	62	2	1	0	0	0	1	0	0	0	1	0	2.1316	6	0.666666667	0.166666667	0.166666667	0	0	0	0	0
1011	7.631378317	4	38	1	1	1	0	0	1	0	0	0	0	0	0.2916	4	0.5	0	0.25	0	0	0	0	0
1012	7.607490709	3	20	2	1	1	0	0	1	0	0	0	0	0	2.3716	3	0.666666667	0.333333333	0	0	0	0	0	0
1013	7.923884106	7	60	4	1	1	0	0	1	0	0	1	0	1	6.0516	7	0.571428571	0.142857143	0	0	0.142857143	0.142857143	0	0
1014	7.84124132	4	44	1	1	1	0	0	0	1	0	0	0	0	0.2916	4	0.5	0	0	0	0	0.25	0	0
1015	7.63031562	7	65	4	1	1	0	0	1	0	0	0	0	0	6.0516	7	0.571428571	0.142857143	0.142857143	0	0.142857143	0.142857143	0	0
1016	7.41014139	5	48	2	1	1	0	0	1	0	0	1	0	1	0.2116	5	0.6	0	0	0	0.2	0	0	0
1017	7.6818463	3	40	3	1	0	0	0	1	0	0	0	0	0	2.3716	3	0.666666667	0	0	0	0	0	0	0
1018	7.579913729	5	38	2	1	1	0	0	0	1	0	0	1	0	0.2116	5	0.4	0	0.2	0	0	0	0	0
1019	7.826862042	3	35	3	1	0	0	0	0	1	0	0	0	0	2.3716	3	0.333333333	0	0	0	0	0.333333333	0	0
1020	7.233924623	4	36	4	1	1	0	0	1	0	1	0	0	0	0.2916	4	0.5	0	0	0	0.25	0	0	0
1021	7.833108819	5	55	2	1	1	0	0	1	0	0	0	1	0	0.2116	5	0.6	0	0.2	0	0	0	0	0
1022	7.669980661	8	35	2	1	1	0	0	1	0	0	0	1	0	11.9716	8	0.25	0	0.125	0.125	0.25	0	0	0
1023	7.916129171	3	58	1	1	1	0	0	0	1	0	0	0	0	2.3716	3	1	0	0	0	0	0	0	0
1024	8.259352082	2	38	2	1	1	0	0	1	0	0	0	0	0	6.4516	2	0.5	0	0	0	0	0.5	0	0
1025	7.495225227	5	45	2	1	1	0	0	0	1	0	0	0	0	0.2116	5	0.4	0	0.2	0	0	0	0	0
1026	7.870841807	3	30	1	1	1	0	0	0	1	0	0	0	0	2.3716	3	0.666666667	0	0.333333333	0	0	0	0	0
1027	6.703776897	1	35	1	1	1	0	0	1	0	0	0	0	0	12.5316	1	1	0	0	0	0	0	0	0
1028	7.794975529	4	52	1	1	0	0	0	1	0	0	0	0	0	0.2916	4	0.75	0	0	0	0	0	0	0
1029	7.85484676	5	33	2	1	1	0	0	1	0	0	0	0	1	0.2116	5	0.6	0	0.2	0.2	0	0	0	0
1030	7.555146438	6	45	2	1	1	0	0	1	0	0	0	0	0	2.1316	6	0.5	0	0.166666667	0	0	0	0	0
1031	7.69811991	5	33	4	1	1	0	0	0	1	0	1	0	0	0.2116	5	0.6	0	0.2	0	0	0	0	0
1032	7.759695205	4	44	2	1	1	1	0	1	0	0	0	0	1	0.2916	4	0.75	0.25	0	0	0	0	0	0
1033	7.958499978	6	39	2	1	1	0	0	1	0	0	0	0	0	2.1316	6	0.5	0.166666667	0.166666667	0	0	0.166666667	0	0
1034	7.464865072	3	32	3	1	1	0	0	1	0	0	0	0	0	2.3716	3	0.666666667	0	0	0	0	0	0	0
1035	7.329126544	6	37	3	1	1	0	0	1	0	0	0	1	0	2.1316	6	0.333333333	0	0.166666667	0	0.166666667	0	0	0
1036	7.529809169	5	35	2	1	1	0	0	1	0	0	0	0	0	0.2116	5	0.6	0	0.2	0	0	0	0	0
1037	7.730271451	3	23	1	1	1	0	0	0	1	0	0	0	0	2.3716	3	0.666666667	0	0.333333333	0	0	0	0	0
1038	7.947876502	2	18	1	1	1	0	0	1	0	0	0	1	0	6.4516	2	0.5	0.5	0	0	0	0	0	0
1039	7.38887811	5	31	2	1	1	0	0	1	0	0	0	0	0	0.2116	5	0.4	0	0.4	0	0	0	0	0
1040	8.074222459	5	55	3	1	1	0	0	1	0	0	0	0	0	0.2116	5	0.8	0	0	0.2	0	0	0	0
1041	7.949776052	5	77	3	1	1	0	0	1	0	0	0	0	0	0.2116	5	0.6	0.4	0	0	0	0	0	0
1042	7.589204302	7	35	2	1	1	0	0	1	0	0	0	0	0	6.0516	7	0.285714286	0	0.142857143	0.142857143	0	0	0	0
1043	8.043666564	5	38	2	1	1	0	0	1	0	0	0	0	0	0.2116	5	0.4	0	0	0	0.2	0	0	0
1044	7.858273509	6	45	4	1	1	0	0	1	0	0	0	0	0	2.1316	6	0.5	0	0.166666667	0	0	0	0	0
1045	7.583817336	7	64	3	1	0	1	0	1	0	0	0	0	0	6.0516	7	0.428571429	0.142857143	0	0	0	0	0	0
1046	7.681970795	6	65	2	1	1	0	0	1	0	0	0	0	0	2.1316	6	0.5	0.333333333	0	0	0	0	0	0
1047	7.823813984	5	32	1	1	1	0	0	1	0	0	0	0	0	0.2116	5	0.4	0	0.2	0	0	0	0	0
1048	8.18407014	2	70	3	1	1	0	0	0	0	0	0	0	0	6.4516	2	0	1	0	0	0	0	0	0
1049	7.910715329	4	57	2	1	1	0	0	1	0	0	0	0	0	0.2916	4	1	0	0	0	0	0	0	0
1050	8.294204628	3	45	2	1	1	1	0	0	0	0	0	0	0	2.3716	3	1	0	0	0	0	0	0	0
1051	7.995063921	5	37	2	1	1	0	0	1	0	0	0	1	0	0.2116	5	0.4	0	0.2	0	0	0	0	0
1052	7.791667437	3	60	2	1	1	0	0	0	0	0	0	0	0	2.3716	3	0.666666667	0.333333333	0	0	0	0	0	0
1053	7.819005328	7	51	2	1	1	0	0	1	0	0	0	0	0	6.0516	7	0.428571429	0	0.142857143	0.142857143	0	0	0	0
1054	7.883785535	3	40	3	1	1	0	0	1	0	0	0	0	0	2.3716	3	0.666666667	0	0	0	0	0.333333333	0	0
1055	7.792105294	9	60	4	1	1	0	0	1	0	0	0	0	0	19.8916	9	0.666666667	0.111111111	0.111111111	0	0	0.111111111	0	0
1056	7.428012287	5	55	5	1	1	0	0	1	0	0	0	0	0	0.2116	5	1	0	0	0	0.2	0	0	0
1057	7.824357962	5	38	2	1	1	0	0	0	1	0	0	0	0	0.2116	5	0.4	0	0.2	0	0	0	0	0
1058	8.108346372	4	28	2	1	1	0	0	1	0	0	0	1	0	0.2916	4	0.5	0	0.25	0.25	0	0	0	0
1059	7.860424226	6	29	2	1	1	0	0	1	0	0	0	1	0	2.1316	6	0.5	0	0	0	0	0.166666667	0	0
1060	7.770569282	7	39	2	1	1	0	0	1	0	0	0	0	0	6.0516	7	0.285714286	0	0.285714286	0.142857143	0	0	0	0
1061	7.832978002	4	58	2	1	1	0	0	0	1	0	0	1	0	0.2916	4	0.75	0	0	0	0	0	0	0
1062	7.631475311	4	46	2	1	1	0	0	1	0	0	0	0	0	0.2916	4	0.5	0	0	0	0	0.25	0	0
1063	7.765658136	5	38	1	1	1	0	0	1	0	0	0	0	1	0.2116	5	0.4	0	0.2	0	0	0.4	0	0
1064	7.619734027	6	43	2	1	1	0	0	1	0	0	0	0	1	2.1316	6	0.666666667	0	0	0	0.166666667	0	0	0
1065	7.846687741	4	63	2	1	1	0	0	1	0	0	0	0	0	0.2916	4	0.75	0.25	0	0	0	0	0	0
1066	7.724808931	4	62	1	1	1	0	0	0	1	0	0	0	0	0.2916	4	0.25	0.25	0.25	0	0	0.25	0	0
1067	7.635559892	9	67	2	1	1	0	0	0	0	0	0	0	0	19.8916	9	0.888888889	0.111111111	0	0	0	0.222222222	0	0
1068	7.830206993	3	91	2	1	0	0	0	1	0	0	0	0	0	2.3716	3	0.333333333	0.666666667	0	0	0	0	0	0
1069	7.642269905	9	30	5	1	1	0	0	1	0	0	0	0	1	19.8916	9	0.666666667	0.111111111	0.111111111	0	0	0.111111111	0	0
1070	7.929936386	3	60	3	1	1	0	0	1	0	0	0	1	0	2.3716	3	0.666666667	0.333333333	0	0	0	0	0	0
1071	7.829343952	4	38	2	1	1	0	0	1	0	0	0	0	1	0.2916	4	0.5	0	0.25	0	0	0	0	0
1072	7.683541793	4	60	4	1	0	0	0	0	1	0	0	0	0	0.2916	4	0.25	0.25	0.25	0	0	0	0	0
1073	7.62179273	4	22	1	1	1	0	0	0	1	0	0	0	0	0.2916	4	0.5	0	0.5	0	0	0	0	0
1074	8.040852727	3	29	2	1	0	0	0	1	0	0	0	0	1	2.3716	3	0.666666667	0	0	0.333333333	0	0	0	0
1075	7.76226422	4	30	2	1	1	0	0	0	1	0	0	0	0	0.2916	4	0.5	0	0.5	0	0	0	0	0
1076	7.899335285	4	55	2	1	1	0	0	0	1	0	0	0	0	0.2916	4	0.5	0	0	0	0	0	0	0
1077	8.044706482	4	29	2	1	1	0	0	0	1	0	0	0	0	0.2916	4	0.5	0	0.25	0	0	0	0	0
1078	7.902095348	5	30	1	1	1	0	0	0	1	0	0	0	0	0.2116	5	0.4	0	0.2	0	0	0.2	0	0
1079	7.880573781	3	74	2	1	1	0	0	0	1	0	0	0	1	2.3716	3	0.666666667	0.333333333	0	0	0	0	0	0
1080	7.834748534	4	25	1	1	1	0	0	0	1	0	0	0	0	0.2916	4	0.5	0	0.5	0	0	0	0	0
1081	7.609837424	6	53	4	0	1	0	0	1	0	0	0	0	1	2.1316	0	0.666666667	0	0	0	0	0	0	0
1082	7.67456176	7	35	2	0	1	0	0	1	0	0	0	0	0	6.0516	0	0.285714286	0	0.142857143	0	0.142857143	0	0	0
1083	7.788460283	6	44	3	0	1	0	0	1	0	0	0	0	0	2.1316	0	0.333333333	0	0.166666667	0	0	0.166666667	0	0
1084	7.352761562	8	48	2	0	1	0	0	1	0	0	0	0	0	11.9716	0	0.5	0	0	0	0	0	0	0
1085	7.826231621	6	51	5	0	1	0	0	1	0	0	0	0	1	2.1316	0	0.833333333	0	0	0	0	0	0	0
1086	7.585672064	4	45	3	0	0	1	0	1	0	0	0	0	0	0.2916	0	0.5	0	0.25	0	0	0.25	0	0
1087	7.702908355	4	26	3	0	1	0	0	0	1	0	0	0	0	0.2916	0	0.5	0	0.25	0	0	0	0	0
1088	7.309667416	5	25	4	0	1	0	0	1	0	0	0	1	0	0.2116	0	0.4	0	0.2	0.2	0	0	0	0
1089	7.598459478	5	34	2	0	1	0	0	1	0	0	0	0	0	0.2116	0	0.4	0	0.2	0	0	0.2	0	0
1090	7.544459084	4	30	1	0	1	0	0	1	0	0	0	0	0	0.2916	0	0.5	0	0	0	0	0	0	0
1091	7.87028817	4	42	3	0	1	0	0	1	0	0	0	0	0	0.2916	0	0.75	0	0	0.25	0.25	0	0	0
1092	7.729528717	4	30	2	0	1	0	0	1	0	0	0	1	0	0.2916	0	0.5	0	0.5	0	0	0	0	0
1093	8.000906014	2	25	3	0	1	0	0	0	1	0	0	0	0	6.4516	0	1	0	0	0	0	0	0	0
1094	7.555224946	4	25	1	0	1	0	0	0	1	0	0	0	0	0.2916	0	0.5	0	0.5	0	0	0	0	0
1095	7.794440048	2	61	2	0	1	0	0	0	0	0	0	0	0	6.4516	0	0.5	0.5	0	0	0	0	0	0
1096	7.884584041	4	45	3	0	0	0	0	1	0	0	0	0	0	0.2916	0	0.75	0	0	0	0	0.25	0	0
1097	7.901777126	4	33	2	0	1	0	0	0	1	0	0	0	0	0.2916	0	0.25	0	0	0	0	0.25	0	0
1098	7.738148195	7	40	2	0	1	0	0	0	1	0	0	0	0	6.0516	0	0.285714286	0	0.142857143	0	0	0.142857143	0	0
1099	7.664323169	3	55	2	0	1	0	0	0	1	0	0	0	0	2.3716	0	0.666666667	0	0	0	0	0	0	0
1100	7.632042535	3	21	4	0	1	0	0	0	0	0	0	0	0	2.3716	0	0.666666667	0	0.333333333	0	0	0	0	0
1101	7.648358401	3	29	2	0	1	0	0	0	1	0	0	0	1	2.3716	0	0.666666667	0	0.333333333	0	0	0	0	0
1102	7.510293711	4	35	2	0	1	0	0	0	1	0	0	0	0	0.2916	0	0.5	0	0	0	0	0	0	0
1103	7.765891336	4	40	3	0	1	0	0	1	0	0	0	0	1	0.2916	0	0.5	0	0	0	0.25	0	0	0
1104	7.730451558	4	30	2	0	1	0	0	0	1	0	0	0	0	0.2916	0	0.5	0	0	0	0	0	0	0
1105	7.743525522	7	42	2	0	1	0	0	1	0	0	0	0	0	6.0516	0	0.285714286	0	0.142857143	0	0.285714286	0	0	0
1106	7.48705604	3	28	1	0	1	0	0	0	1	0	0	1	0	2.3716	0	0.666666667	0	0.333333333	0	0	0	0	0
1107	7.413264797	3	35	1	0	1	0	0	0	1	0	0	0	0	2.3716	0	0.666666667	0	0	0	0	0	0	0
1108	7.307959908	5	34	1	0	1	0	0	0	1	0	0	0	0	0.2116	0	0.4	0	0.2	0	0	0	0	0
1109	7.772344212	6	37	2	0	1	0	0	0	1	0	1	1	0	2.1316	0	0.5	0	0.166666667	0	0	0	0	0
1110	7.606536558	6	40	2	0	1	0	0	0	1	0	0	0	0	2.1316	0	0.333333333	0	0	0	0	0.5	0	0
1111	7.839824867	4	32	1	0	1	0	0	0	1	0	0	0	0	0.2916	0	0.5	0	0.25	0	0	0	0	0
1112	7.722881126	6	48	2	0	1	0	0	0	1	0	0	0	0	2.1316	0	0.833333333	0	0	0	0	0	0	0
1113	7.609877067	7	40	2	0	1	0	0	0	1	0	0	0	0	6.0516	0	0.571428571	0	0.142857143	0	0	0.142857143	0	0
1114	7.45202535	7	50	2	0	0	0	0	1	0	0	1	0	0	6.0516	0	0.714285714	0	0	0	0	0	0	0
1115	7.220256785	4	32	2	0	1	0	0	0	1	0	0	0	0	0.2916	0	0.5	0	0.25	0	0	0	0	0
1116	7.410734198	4	28	1	0	1	0	0	0	1	0	0	0	1	0.2916	0	0.5	0	0.5	0	0	0	0	0
1117	7.899624615	3	30	2	0	1	0	0	0	1	0	0	0	0	2.3716	0	0.666666667	0	0.333333333	0	0	0	0	0
1118	7.302941069	9	55	2	0	0	0	0	0	1	0	0	0	0	19.8916	0	0.555555556	0	0	0	0.111111111	0	0	0
1119	7.584508815	5	32	2	0	1	0	0	0	1	0	0	1	0	0.2116	0	0.4	0	0	0	0	0	0	0
1120	7.78308234	5	60	4	0	1	0	0	1	0	0	0	0	1	0.2116	0	0.8	0.2	0	0	0	0	0	0
1121	7.790021693	3	22	1	1	1	0	0	1	0	0	0	0	0	2.3716	3	0.666666667	0	0	0.333333333	0	0	0	0
1122	7.516982662	3	36	1	1	1	0	0	1	0	0	0	0	0	2.3716	3	0.666666667	0	0	0	0.333333333	0	0	0
1123	7.519139106	7	67	1	1	0	1	0	1	0	0	0	0	0	6.0516	7	0.285714286	0.142857143	0.142857143	0	0	0	0	0
1124	7.663942984	6	32	1	1	1	0	0	1	0	0	0	0	0	2.1316	6	0.333333333	0	0.166666667	0	0	0	0	0
1125	7.746322279	5	60	2	1	0	0	0	1	0	0	0	0	0	0.2116	5	0.4	0.2	0	0	0	0	0	0
1126	7.994359087	2	65	2	1	1	0	0	1	0	0	0	1	0	6.4516	2	0.5	0.5	0	0	0	0	0	0
1127	7.966999377	5	45	2	1	1	0	0	1	0	0	0	0	0	0.2116	5	0.6	0	0.2	0	0	0	0	0
1128	7.722628821	3	62	1	1	1	0	0	0	0	0	0	0	0	2.3716	3	0.333333333	0.333333333	0	0	0	0	0	0
1129	7.80067093	6	42	2	1	1	0	0	1	0	0	0	0	0	2.1316	6	0.5	0	0.166666667	0	0.166666667	0	0	0
1130	7.738457621	3	60	1	1	1	0	0	1	0	0	0	0	0	2.3716	3	0.333333333	0.333333333	0	0	0	0	0	0
1131	8.021981697	4	38	3	1	0	1	0	1	0	0	0	1	0	0.2916	4	0.75	0	0.25	0	0	0	0	0
1132	7.872253148	4	45	2	1	1	0	0	1	0	0	0	0	0	0.2916	4	0.75	0	0	0	0	0.25	0	0
1133	7.535915838	6	52	2	1	0	1	0	1	0	0	0	0	0	2.1316	6	0.333333333	0.166666667	0.166666667	0	0	0	0	0
1134	7.722748342	6	70	2	1	1	0	0	1	0	0	0	0	0	2.1316	6	0.5	0.166666667	0.166666667	0	0	0	0	0
1135	7.918428488	6	41	2	1	1	0	0	1	0	0	0	1	0	2.1316	6	0.333333333	0	0	0	0.333333333	0	0	0
1136	7.704897543	9	48	2	1	1	0	0	1	0	0	0	0	0	19.8916	9	0.444444444	0	0	0.111111111	0.111111111	0	0	0
1137	8.002305997	4	31	4	1	0	0	0	1	0	0	1	0	0	0.2916	4	0.5	0	0	0	0	0.25	0	0
1138	7.392672151	4	34	1	1	1	0	0	0	0	0	0	1	0	0.2916	4	0.5	0	0.5	0	0	0	0	0
1139	7.945332237	3	33	2	1	1	0	0	0	1	0	0	0	0	2.3716	3	0.666666667	0	0.333333333	0	0	0	0	0
1140	7.431868234	7	66	2	1	1	0	0	1	0	0	0	0	0	6.0516	7	0.428571429	0.142857143	0	0	0.142857143	0.142857143	0	0
1141	7.750024804	4	50	2	1	0	1	0	1	0	0	0	0	0	0.2916	4	0.5	0.25	0	0	0	0.25	0	0
1142	7.700928774	4	28	1	1	0	0	0	1	0	0	0	0	0	0.2916	4	0.25	0	0	0	0	0	0	0
1143	7.756832983	4	50	2	1	0	1	0	1	0	0	0	0	0	0.2916	4	0.5	0	0.25	0	0	0	0	0
1144	7.485704829	4	35	2	1	0	0	0	1	0	0	0	0	0	0.2916	4	0.5	0	0.25	0	0	0	0	0
1145	7.828575736	3	52	2	1	1	0	0	1	0	0	0	0	0	2.3716	3	1	0	0	0	0	0	0	0
1146	7.741112128	4	48	2	1	0	1	0	1	0	0	0	0	0	0.2916	4	0.75	0	0	0	0	0	0	0
1147	7.685712248	4	50	1	1	1	0	0	1	0	0	0	0	0	0.2916	4	0.75	0	0	0	0.25	0	0	0
1148	7.762464181	5	37	2	1	0	0	0	0	1	0	0	0	0	0.2116	5	0.2	0	0.2	0	0	0.4	0	0
1149	7.587117887	5	45	2	1	1	0	0	1	0	0	0	0	0	0.2116	5	0.4	0	0	0	0	0	0	0
1150	7.747937886	5	46	2	1	0	0	0	1	0	0	0	0	0	0.2116	5	0.4	0	0	0.2	0	0	0	0
1151	7.843903539	2	55	1	1	1	0	0	1	0	0	0	0	0	6.4516	2	1	0	0	0	0	0	0	0
1152	7.550882039	5	29	2	1	0	0	0	1	0	0	0	0	0	0.2116	5	0.2	0	0.2	0	0	0	0	0
1153	7.729770496	2	55	2	1	0	1	0	1	0	0	0	0	0	6.4516	2	0.5	0	0	0	0.5	0	0	0
1154	7.999782601	1	61	1	1	1	1	0	1	0	0	0	0	0	12.5316	1	0	1	0	0	0	0	0	0
1155	7.637865819	5	35	2	1	0	0	0	1	0	0	0	0	0	0.2116	5	0.4	0.2	0.2	0	0	0.2	0	0
1156	8.030708899	3	73	1	1	0	1	0	1	0	0	0	0	0	2.3716	3	0.333333333	0.333333333	0.333333333	0	0	0	0	0
1157	8.030435595	3	50	2	1	1	0	0	1	0	0	0	0	0	2.3716	3	1	0	0	0	0	0	0	0
1158	8.047307955	9	58	5	1	1	0	0	1	0	0	0	0	1	19.8916	9	0.777777778	0	0.111111111	0	0	0	0	0
1159	7.732768091	3	35	1	1	1	0	0	1	0	0	1	0	0	2.3716	3	0.666666667	0	0	0	0	0	0	0
1160	7.897266732	3	27	2	1	0	0	0	1	0	0	0	0	0	2.3716	3	0.333333333	0	0	0	0.333333333	0	0	0
1161	7.595211296	6	76	2	1	0	1	0	0	1	0	0	0	0	2.1316	6	0.666666667	0.166666667	0.166666667	0	0	0	0	0
1162	7.715516033	4	50	5	1	1	0	0	1	0	0	0	0	1	0.2916	4	0.75	0	0.25	0	0	0	0	0
1163	7.751643046	6	38	3	1	1	0	0	1	0	0	0	1	0	2.1316	6	0.333333333	0	0.166666667	0	0.166666667	0	0	0
1164	7.798227565	5	75	2	1	1	0	0	1	0	0	0	0	0	0.2116	5	0.4	0.2	0.2	0	0	0	0	0
1165	7.971254938	5	62	2	1	1	0	0	1	0	0	0	0	1	0.2116	5	0.6	0.2	0	0.2	0	0	0	0
1166	7.846977073	7	55	2	1	1	0	0	1	0	0	0	0	1	6.0516	7	0.714285714	0	0	0	0.142857143	0.142857143	0	0
1167	7.626107136	6	37	1	1	1	0	0	1	0	0	0	0	0	2.1316	6	0.333333333	0	0.166666667	0	0.166666667	0	0	0
1168	7.850095751	4	45	2	1	1	0	0	1	0	1	0	0	1	0.2916	4	0.75	0	0	0	0	0	0	0
1169	7.848399054	3	42	3	1	1	0	0	1	0	0	0	0	1	2.3716	3	1	0	0	0	0	0	0	0
1170	7.538282098	4	25	2	1	1	0	0	1	0	0	0	0	1	0.2916	4	0.5	0	0.5	0	0	0	0	0
1171	7.884252663	12	75	4	1	0	0	0	1	0	0	0	0	0	55.6516	12	0.75	0.083333333	0.083333333	0.083333333	0	0	0	0
1172	7.979253275	5	45	3	1	1	0	0	1	0	1	0	0	1	0.2116	5	0.6	0	0.2	0	0	0	0	0
1173	7.887595293	3	33	4	1	1	0	0	1	0	1	0	0	1	2.3716	3	0.666666667	0	0.333333333	0	0	0	0	0
1174	7.771476112	3	54	2	1	1	0	0	1	0	0	1	0	1	2.3716	3	0.666666667	0.333333333	0	0	0	0	0	0
1175	7.632115233	6	55	2	1	0	1	0	1	0	0	0	0	0	2.1316	6	0.5	0	0	0	0.166666667	0	0	0
1176	7.588273043	11	54	2	1	1	0	0	1	0	0	0	0	0	41.7316	11	0.272727273	0.181818182	0.181818182	0	0.090909091	0	0	0
1177	7.692063133	5	40	1	1	1	0	0	1	0	0	0	0	0	0.2116	5	0.4	0	0.2	0	0	0.2	0	0
1178	7.855362491	6	38	2	1	1	0	0	1	0	0	0	0	1	2.1316	6	0.333333333	0	0.166666667	0.166666667	0	0	0	0
1179	7.585479129	7	55	2	1	1	0	0	1	0	0	0	0	0	6.0516	7	0.428571429	0.142857143	0.142857143	0	0	0.142857143	0	0
1180	7.871311203	8	48	5	1	0	1	0	1	0	1	0	0	0	11.9716	8	0.5	0	0.125	0	0	0	0	0
1181	7.768072307	10	31	3	1	0	0	0	1	0	0	0	0	0	29.8116	10	0.2	0.1	0.1	0	0.2	0	0	0
1182	7.567273285	6	30	1	1	1	0	0	1	0	0	0	0	0	2.1316	6	0.333333333	0	0.333333333	0	0	0	0	0
1183	7.765340047	7	42	2	1	1	0	0	1	0	0	0	1	0	6.0516	7	0.285714286	0	0	0	0.142857143	0.142857143	0	0
1184	7.592078644	6	36	1	1	1	0	0	1	0	0	0	1	0	2.1316	6	0.333333333	0	0	0	0	0	0	0
1185	7.937728205	6	56	4	1	1	1	0	1	0	0	1	0	0	2.1316	6	0.5	0	0	0	0.333333333	0	0	0
1186	7.44884043	7	35	2	1	1	0	0	1	0	0	0	0	0	6.0516	7	0.285714286	0	0.285714286	0	0	0.142857143	0	0
1187	7.718498811	4	30	1	1	0	0	0	1	0	0	0	0	0	0.2916	4	0.25	0.25	0.25	0	0	0	0	0
1188	8.085058593	3	26	1	1	1	0	0	1	0	0	0	0	0	2.3716	3	0.666666667	0	0.333333333	0	0	0	0	0
1189	7.336904361	8	50	2	1	1	0	0	1	0	0	0	0	0	11.9716	8	0.25	0	0.125	0	0.125	0	0	0
1190	7.468553225	8	42	2	1	1	0	0	1	0	0	0	0	0	11.9716	8	0.25	0	0.125	0	0.125	0.125	0	0
1191	7.569416952	6	33	1	1	1	0	0	1	0	0	0	1	0	2.1316	6	0.5	0	0.333333333	0	0	0	0	0
1192	7.791617856	6	30	2	1	1	0	0	1	0	0	0	0	0	2.1316	6	0.5	0	0.166666667	0.166666667	0	0	0	0
1193	7.587761494	7	48	3	1	1	0	0	1	0	0	1	0	0	6.0516	7	0.857142857	0	0	0	0	0	0	0
1194	7.71366402	4	39	2	1	1	0	0	1	0	0	0	0	0	0.2916	4	0.5	0	0.25	0	0	0	0	0
1195	7.634965665	4	90	1	1	1	0	0	1	0	0	0	0	0	0.2916	4	0.25	0.5	0	0	0	0	0	0
1196	7.55782271	5	27	2	1	0	1	0	1	0	0	0	1	0	0.2116	5	0.2	0	0.2	0	0	0.2	0	0
1197	7.858524729	4	55	2	1	1	0	0	1	0	0	0	0	0	0.2916	4	1	0	0	0	0	0	0	0
1198	7.732763708	9	42	2	1	1	0	0	1	0	0	0	0	0	19.8916	9	0.222222222	0	0.222222222	0	0.111111111	0	0	0
1199	7.568286288	5	65	2	1	1	0	0	1	0	0	0	0	0	0.2116	5	0.4	0.2	0	0	0.2	0.2	0	0
1200	7.619792906	5	28	1	1	0	0	0	1	0	0	0	1	0	0.2116	5	0.2	0	0.4	0	0	0	0	0
1201	7.43567398	7	39	1	1	1	0	0	1	0	0	0	0	0	6.0516	7	0.285714286	0	0.285714286	0	0.142857143	0	0	0
1202	7.660604303	10	47	2	1	1	0	0	1	0	0	0	0	1	29.8116	10	0.2	0	0.1	0	0.2	0.2	0	0
1203	7.691149845	12	53	3	1	1	0	0	1	0	0	1	0	0	55.6516	12	0.416666667	0	0.166666667	0	0.25	0	0	0
1204	7.916213074	7	62	2	1	1	0	0	1	0	0	0	0	1	6.0516	7	0.571428571	0.142857143	0.142857143	0	0.142857143	0	0	0
1205	7.823333757	4	45	1	1	1	0	0	1	0	0	0	0	0	0.2916	4	0.5	0	0	0	0	0.5	0	0
1206	7.6547844	4	23	2	1	0	0	0	1	0	0	0	0	1	0.2916	4	0.25	0.25	0.5	0	0	0	0	0
1207	7.605248004	9	60	1	1	1	0	0	1	0	0	0	0	0	19.8916	9	0.444444444	0.111111111	0.222222222	0	0	0.111111111	0	0
1208	7.851365414	6	44	2	1	1	0	0	1	0	0	0	0	0	2.1316	6	0.333333333	0	0	0	0.166666667	0	0	0
1209	7.575497468	6	33	1	1	1	0	0	1	0	0	0	0	0	2.1316	6	0.333333333	0.166666667	0.166666667	0	0	0	0	0
1210	7.673841535	6	46	2	1	1	0	0	1	0	0	0	0	0	2.1316	6	0.666666667	0	0	0	0.166666667	0.333333333	0	0
1211	7.621689896	6	45	1	1	1	0	0	1	0	0	0	0	0	2.1316	6	0.333333333	0	0	0	0.166666667	0	0	0
1212	7.706401466	7	42	2	1	1	0	0	1	0	0	0	0	0	6.0516	7	0.285714286	0	0.142857143	0	0.285714286	0	0	0
1213	7.441074025	13	50	3	1	1	0	0	1	0	0	0	1	0	71.5716	13	0.384615385	0.076923077	0.153846154	0.076923077	0	0.076923077	0	0
1214	7.79399909	8	68	1	1	1	0	0	1	0	0	0	0	0	11.9716	8	0.375	0.125	0.125	0.125	0.125	0	0	0
1215	7.644206172	6	67	4	1	1	0	0	1	0	1	0	0	1	2.1316	6	0.333333333	0.166666667	0.333333333	0	0	0	0	0
1216	7.525170862	7	45	1	1	1	0	0	1	0	0	0	0	1	6.0516	7	0.571428571	0	0	0	0	0.142857143	0	0
1217	7.732220154	17	64	5	1	1	0	0	1	0	0	0	0	0	155.2516	17	0.529411765	0.058823529	0.294117647	0	0	0	0	0
1218	7.60190196	8	58	1	1	1	0	0	1	0	0	0	0	0	11.9716	8	0.625	0	0.25	0	0	0	0	0
1219	7.922311818	4	51	2	1	1	0	0	1	0	0	0	0	0	0.2916	4	0.5	0	0	0	0	0.25	0	0
1220	7.462375754	6	40	1	1	1	0	0	1	0	0	0	0	0	2.1316	6	0.333333333	0	0.166666667	0	0	0	0	0
1221	7.681929298	8	51	2	1	1	0	0	1	0	0	0	0	0	11.9716	8	0.5	0	0.125	0	0	0	0	0
1222	7.709707536	6	33	2	1	1	0	0	1	0	0	1	0	0	2.1316	6	0.333333333	0.166666667	0.333333333	0.166666667	0	0	0	0
1223	8.071865004	2	53	2	1	0	1	0	1	0	0	0	0	0	6.4516	2	1	0	0	0	0	0	0	0
1224	7.651586068	7	53	2	1	1	0	0	1	0	0	0	0	0	6.0516	7	0.428571429	0	0	0	0	0	0	0
1225	7.833940895	1	72	1	1	0	1	0	1	0	0	0	0	0	12.5316	1	0	1	0	0	0	0	0	0
1226	7.909313201	6	45	2	1	1	0	0	1	0	0	0	0	0	2.1316	6	0.333333333	0	0.166666667	0	0	0	0	0
1227	7.684462053	6	46	3	1	1	0	0	1	0	0	0	0	0	2.1316	6	0.333333333	0.166666667	0.166666667	0	0.166666667	0	0	0
1228	7.987531273	3	72	2	1	0	0	0	0	1	0	0	0	0	2.3716	3	0.666666667	0.333333333	0	0	0	0	0	0
1229	7.861048882	4	44	2	1	1	0	0	1	0	0	0	0	0	0.2916	4	0.75	0	0	0	0.25	0	0	0
1230	7.627101254	5	31	1	1	0	0	0	1	0	0	0	0	0	0.2116	5	0.2	0	0.2	0	0	0.4	0	0
1231	7.904737124	5	30	2	1	0	0	0	1	0	0	0	0	0	0.2116	5	0.2	0	0	0	0	0	0	0
1232	7.584290237	7	43	1	1	1	0	0	1	0	0	0	0	0	6.0516	7	0.428571429	0	0.142857143	0	0	0	0	0
1233	7.699742765	6	47	2	1	0	0	0	1	0	0	0	0	0	2.1316	6	0.666666667	0	0.166666667	0	0	0	0	0
1234	7.801820852	6	72	3	1	0	1	0	1	0	0	1	0	1	2.1316	6	0.333333333	0.166666667	0.166666667	0	0	0.166666667	0	0
1235	7.826355342	4	48	1	1	1	0	0	1	0	0	0	0	0	0.2916	4	0.5	0	0	0	0.25	0	0	0
1236	7.891697183	2	85	1	1	1	0	0	1	0	0	0	0	0	6.4516	2	0	1	0	0	0	0	0	0
1237	7.706639904	9	77	4	1	1	0	0	1	0	0	0	0	0	19.8916	9	0.444444444	0.222222222	0	0	0.111111111	0	0	0
1238	7.318479865	5	47	1	1	0	0	0	1	0	0	0	0	0	0.2116	5	0.4	0	0.2	0	0	0	0	0
1239	7.620940353	4	30	1	1	1	0	0	0	1	0	0	0	0	0.2916	4	0.5	0	0.5	0	0	0	0	0
1240	8.009270018	4	45	2	1	1	0	0	1	0	0	0	0	0	0.2916	4	0.75	0	0	0	0.25	0	0	0
1241	7.859914959	5	70	2	1	0	0	0	1	0	0	0	0	0	0.2116	5	0.4	0.4	0.2	0	0	0	0	0
1242	7.784252654	5	40	1	1	1	0	0	1	0	0	0	0	0	0.2116	5	0.4	0	0	0.2	0	0	0	0
1243	8.11188907	2	40	2	1	1	0	0	1	0	0	0	0	0	6.4516	2	1	0	0	0	0	0	0	0
1244	7.848141372	7	60	3	1	1	0	0	1	0	0	0	0	0	6.0516	7	0.285714286	0.142857143	0	0	0.142857143	0	0	0
1245	7.626258267	7	37	1	1	1	0	0	1	0	0	0	0	0	6.0516	7	0.285714286	0	0.285714286	0	0	0	0	0
1246	7.744002303	6	25	1	1	1	0	0	1	0	0	0	0	0	2.1316	6	0.333333333	0	0.333333333	0	0	0	0	0
1247	7.82123005	5	60	4	1	1	0	0	1	0	1	0	0	0	0.2116	5	0.6	0.2	0.2	0	0	0	0	0
1248	7.943803984	3	28	2	1	0	0	0	1	0	0	0	1	0	2.3716	3	0.666666667	0	0	0	0	0.666666667	0	0
1249	7.720111145	6	45	2	1	1	0	0	1	0	0	0	0	0	2.1316	6	0.666666667	0	0.166666667	0	0	0	0	0
1250	8.14288076	1	60	1	1	0	1	0	1	0	0	0	0	0	12.5316	1	0	1	0	0	0	0	0	0
1251	7.778487818	9	32	2	1	1	0	0	1	0	0	0	0	0	19.8916	9	0.333333333	0.111111111	0.222222222	0.222222222	0	0	0	0
1252	7.719600632	10	48	4	1	1	0	0	1	0	0	0	1	0	29.8116	10	0.3	0.1	0.2	0	0.1	0	0	0
1253	7.774687685	15	48	2	1	1	0	0	1	0	0	0	0	0	109.4116	15	0.266666667	0.066666667	0.133333333	0	0.133333333	0	0	0
1254	8.120442998	1	55	1	1	1	1	0	1	0	0	0	0	0	12.5316	1	1	0	0	0	0	0	0	0
1255	7.474312633	7	60	2	1	1	0	0	1	0	0	0	0	0	6.0516	7	0.285714286	0.142857143	0.142857143	0	0	0	0	0
1256	7.408960777	8	40	2	1	1	0	0	1	0	0	0	0	0	11.9716	8	0.375	0.125	0	0	0	0	0	0
1257	7.957058269	2	40	1	1	1	0	0	1	0	0	0	0	0	6.4516	2	1	0	0	0	0	0	0	0
1258	7.802654842	6	38	2	1	0	0	0	1	0	0	0	0	1	2.1316	6	0.333333333	0.166666667	0	0	0.333333333	0	0	0
1259	7.80394942	5	47	2	1	1	0	0	0	1	0	1	1	0	0.2116	5	0.4	0	0	0	0	0	0	0
1260	7.47130048	5	32	1	1	1	0	0	1	0	0	0	1	0	0.2116	5	0.4	0.2	0.2	0	0	0	0	0
1261	7.628639215	7	51	2	0	1	0	0	1	0	0	0	1	0	6.0516	0	0.428571429	0	0.285714286	0	0	0	0	0
1262	7.980591535	3	45	3	0	1	0	0	1	0	0	0	1	0	2.3716	0	0.666666667	0	0	0	0	0.333333333	0	0
1263	7.780152638	2	26	1	0	1	0	0	1	0	0	0	1	0	6.4516	0	1	0	0	0	0	0	0	0
1264	7.64620082	8	60	3	0	1	0	0	1	0	0	0	0	0	11.9716	0	0.375	0.125	0.125	0	0.125	0	0	0
1265	7.683320805	9	60	2	0	0	0	0	1	0	0	0	0	0	19.8916	0	0.444444444	0.111111111	0.111111111	0	0	0	0	0
1266	8.01776899	4	39	2	0	1	0	0	1	0	0	0	0	1	0.2916	0	0.5	0	0	0	0	0.25	0	0
1267	7.514347342	6	45	2	0	1	0	0	0	1	0	0	1	0	2.1316	0	0.833333333	0	0	0	0	0	0	0
1268	7.524911947	6	52	1	0	1	0	0	1	0	0	0	0	0	2.1316	0	0.833333333	0	0	0.166666667	0	0	0	0
1269	7.631882581	9	75	4	0	0	0	0	1	0	0	0	0	0	19.8916	0	0.333333333	0.222222222	0.222222222	0	0.111111111	0	0	0
1270	7.688056743	6	45	2	0	1	0	0	1	0	0	0	0	0	2.1316	0	0.5	0	0	0.166666667	0	0	0	0
1271	7.824126008	3	31	2	0	1	0	0	1	0	0	0	0	0	2.3716	0	0.666666667	0	0.333333333	0	0	0	0	0
1272	7.657159912	4	40	1	0	1	0	0	1	0	0	0	0	0	0.2916	0	0.5	0	0.5	0	0	0	0	0
1273	7.315072005	8	43	1	0	1	0	0	1	0	0	0	0	0	11.9716	0	0.5	0.125	0	0	0	0	0	0
1274	7.478022708	5	32	1	0	1	0	0	1	0	0	0	1	0	0.2116	0	0.4	0	0.2	0	0	0	0	0
1275	7.733858687	7	45	2	0	1	0	0	1	0	0	0	0	0	6.0516	0	0.428571429	0	0	0	0.571428571	0	0	0
1276	7.745950406	4	37	2	0	1	0	0	1	0	0	0	0	0	0.2916	0	0.5	0	0	0	0	0	0	0
1277	7.899580108	2	40	1	0	1	0	0	1	0	0	0	0	0	6.4516	0	1	0	0	0	0	0	0	0
1278	7.896113617	3	32	2	0	1	0	0	1	0	1	0	0	1	2.3716	0	0.333333333	0	0	0	0.333333333	0	0	0
1279	7.613458304	3	29	1	0	0	0	0	1	0	0	0	0	1	2.3716	0	0.333333333	0	0.333333333	0	0	0	0	0
1280	7.510622109	6	42	4	0	1	0	0	1	0	1	0	0	1	2.1316	0	0.333333333	0	0.166666667	0	0.166666667	0	0	0
1281	7.796111449	2	33	1	0	1	0	0	1	0	0	0	0	0	6.4516	0	1	0	0	0	0	0	0	0
1282	7.865291596	4	32	2	0	1	0	0	1	0	0	1	0	0	0.2916	0	0.75	0	0	0.25	0	0	0	0
1283	7.834463559	5	57	2	0	1	0	0	1	0	0	0	0	0	0.2116	0	0.6	0	0	0	0	0.2	0	0
1284	7.599421363	6	25	2	0	1	0	0	1	0	0	0	0	0	2.1316	0	0.5	0	0.333333333	0	0	0	0	0
1285	7.668663906	3	25	1	0	1	0	0	1	0	0	1	1	0	2.3716	0	0.666666667	0	0.333333333	0	0	0	0	0
1286	8.063028265	4	54	3	0	1	0	0	1	0	0	1	0	1	0.2916	0	1	0	0	0	0	0	0	0
1287	8.183210254	2	20	2	0	0	0	0	1	0	0	1	1	0	6.4516	0	0.5	0	0	0.5	0	0	0	0
1288	7.87447293	8	50	2	0	1	0	0	1	0	0	0	0	0	11.9716	0	0.75	0	0	0	0.125	0	0	0
1289	7.837854237	5	22	2	0	1	0	0	1	0	0	0	0	0	0.2116	0	0.8	0	0	0	0	0	0	0
1290	7.963390475	5	63	2	0	1	0	0	1	0	0	1	0	0	0.2116	0	0.2	0.2	0	0	0.2	0	0	0
1291	7.535867815	7	50	2	0	1	0	0	1	0	0	1	0	0	6.0516	0	0.285714286	0	0.142857143	0	0	0	0	0
1292	7.79295155	6	39	2	0	1	0	0	1	0	0	1	1	0	2.1316	0	0.333333333	0	0.166666667	0.166666667	0.166666667	0	0	0
1293	7.908115063	8	60	2	0	1	0	0	1	0	0	0	0	0	11.9716	0	0.5	0.125	0.125	0.125	0	0	0	0
1294	7.832311755	5	50	3	0	1	0	0	1	0	1	0	1	0	0.2116	0	0.8	0	0	0	0	0.2	0	0
1295	7.823149609	3	45	1	0	1	0	0	1	0	0	0	1	0	2.3716	0	0.666666667	0	0	0	0	0	0	0
1296	7.78533013	4	31	2	0	1	0	0	1	0	0	1	0	1	0.2916	0	0.5	0.5	0	0	0	0	0	0
1297	7.362397778	7	40	2	0	1	0	0	1	0	0	0	1	0	6.0516	0	0.285714286	0.142857143	0.142857143	0	0.142857143	0	0	0
1298	7.810802704	9	65	3	0	1	0	0	1	0	0	0	0	0	19.8916	0	0.555555556	0.111111111	0.111111111	0	0	0	0	0
1299	7.995896268	8	70	5	0	0	0	0	1	0	0	1	1	0	11.9716	0	0.625	0.25	0	0	0	0.125	0	0
1300	7.696680712	3	35	1	0	1	0	0	0	1	0	0	0	0	2.3716	0	0.666666667	0	0.333333333	0	0	0	0	0
1301	7.938645317	4	67	1	0	1	0	0	1	0	0	0	1	0	0.2916	0	0.75	0.25	0	0	0	0	0	0
1302	7.3958321	4	59	1	0	1	1	0	1	0	0	0	0	0	0.2916	0	0.5	0	0	0	0	0	0	0
1303	7.881718515	3	77	2	0	0	0	0	1	0	0	0	1	0	2.3716	0	0.333333333	0.666666667	0	0	0	0	0	0
1304	7.658369159	5	62	1	0	1	1	0	1	0	0	0	0	0	0.2116	0	0.4	0.2	0.2	0.2	0	0	0	0
1305	8.029504499	5	65	2	0	1	0	0	1	0	1	0	0	0	0.2116	0	0.8	0.2	0	0	0	0	0	0
1306	7.712966953	7	62	3	0	1	0	0	1	0	0	0	0	1	6.0516	0	0.714285714	0.142857143	0.142857143	0	0	0	0	0
1307	7.432572561	7	54	2	0	1	0	0	1	0	0	0	1	0	6.0516	0	0.714285714	0	0.142857143	0	0	0	0	0
1308	7.870933414	3	22	2	0	0	0	0	1	0	0	0	0	1	2.3716	0	0.333333333	0	0.333333333	0	0	0	0	0
1309	7.655234383	7	57	1	0	1	0	0	1	0	0	0	0	0	6.0516	0	0.285714286	0.142857143	0.142857143	0	0.142857143	0	0	0
1310	7.58331368	4	26	1	0	0	0	0	1	0	0	0	0	0	0.2916	0	0.5	0	0	0	0	0	0	0
1311	7.533255111	6	62	3	0	1	0	0	1	0	0	0	0	0	2.1316	0	0.5	0.166666667	0.166666667	0	0	0	0	0
1312	7.92583335	3	44	2	0	0	0	0	1	0	1	0	0	0	2.3716	0	1	0	0	0	0	0	0	0
1313	7.562634492	5	53	2	0	0	1	0	1	0	0	0	0	0	0.2116	0	0.6	0	0	0	0	0	0	0
1314	7.903529793	4	50	2	0	1	0	0	1	0	0	0	0	0	0.2916	0	0.75	0	0	0	0	0	0	0
1315	8.178282384	2	39	3	0	0	0	0	1	0	0	0	0	0	6.4516	0	1	0	0	0	0	0	0	0
1316	7.554230051	5	38	2	0	1	0	0	1	0	0	0	0	1	0.2116	0	0.4	0.2	0.2	0	0	0	0	0
1317	7.882311145	7	48	2	0	1	0	0	1	0	0	0	0	0	6.0516	0	0.857142857	0	0	0	0	0.142857143	0	0
1318	7.704347642	4	52	1	0	1	0	0	1	0	0	0	0	1	0.2916	0	0.75	0	0	0	0.25	0	0	0
1319	7.471579343	6	57	2	0	1	0	0	1	0	0	0	0	0	2.1316	0	0.5	0	0	0	0.333333333	0	0	0
1320	7.822881333	7	45	2	0	1	0	0	1	0	0	0	1	0	6.0516	0	0.285714286	0.285714286	0	0	0	0.142857143	0	0
1321	7.975489028	3	49	3	1	1	0	0	1	0	0	0	0	0	2.3716	3	0.666666667	0	0	0	0	0.333333333	0	0
1322	7.816956943	3	34	2	1	0	0	0	1	0	0	0	0	0	2.3716	3	0.666666667	0	0	0	0	0.333333333	0	0
1323	7.383330856	7	55	4	1	1	0	0	1	0	0	0	0	1	6.0516	7	0.571428571	0	0	0	0.142857143	0.142857143	0	0
1324	7.335783905	5	36	4	1	1	0	0	1	0	0	1	0	0	0.2116	5	0.4	0.2	0	0.2	0	0	0	0
1325	7.377152474	13	65	4	1	0	0	0	1	0	0	0	0	0	71.5716	13	0.615384615	0.076923077	0.153846154	0	0	0.076923077	0	0
1326	7.073498505	4	28	2	1	1	0	0	1	0	0	0	0	1	0.2916	4	0.5	0	0.25	0	0	0	0	0
1327	8.116793234	1	68	2	1	0	1	0	1	0	0	0	0	1	12.5316	1	0	1	0	0	0	0	0	0
1328	7.424672312	4	30	2	1	1	0	0	1	0	0	0	1	0	0.2916	4	0.5	0.25	0.25	0	0	0	0	0
1329	7.521853841	7	74	3	1	0	0	0	1	0	0	0	0	0	6.0516	7	0.571428571	0.285714286	0	0.142857143	0	0	0	0
1330	7.384424146	4	35	2	1	1	0	0	1	0	0	0	1	0	0.2916	4	0.5	0	0.25	0	0	0	0	0
1331	7.586032447	5	40	2	1	1	0	0	1	0	0	0	0	1	0.2116	5	0.4	0.2	0.2	0.2	0	0	0	0
1332	7.875195295	2	60	2	1	0	1	0	1	0	0	0	0	0	6.4516	2	0.5	0.5	0	0	0	0	0	0
1333	7.540679944	4	41	2	1	0	0	0	1	0	0	0	1	0	0.2916	4	0.5	0	0	0	0	0	0	0
1334	7.283558113	7	52	3	1	1	0	0	1	0	0	0	1	0	6.0516	7	0.714285714	0	0.285714286	0	0	0	0	0
1335	7.722872274	6	44	3	1	1	0	0	1	0	0	0	1	0	2.1316	6	0.333333333	0	0.166666667	0	0.166666667	0	0	0
1336	7.65993994	3	28	3	1	1	0	0	1	0	0	0	0	0	2.3716	3	0.666666667	0	0.333333333	0	0	0	0	0
1337	7.371281727	7	76	2	1	1	0	0	1	0	0	0	0	0	6.0516	7	0.285714286	0.285714286	0	0	0.142857143	0.142857143	0	0
1338	7.461990905	7	55	3	1	1	0	0	1	0	0	0	0	0	6.0516	7	0.857142857	0	0.142857143	0	0	0	0	0
1339	7.484037128	6	56	3	1	0	0	0	1	0	0	0	0	0	2.1316	6	0.833333333	0	0.166666667	0	0	0.166666667	0	0
1340	7.503096668	6	45	3	1	1	0	0	1	0	0	0	0	0	2.1316	6	0.333333333	0.166666667	0.166666667	0	0	0	0	0
1341	7.792753467	5	53	5	1	0	0	0	1	0	0	1	0	1	0.2116	5	0.8	0.2	0	0	0	0	0	0
1342	7.388637026	10	54	4	1	1	0	0	1	0	0	0	0	0	29.8116	10	0.8	0	0	0.1	0	0.1	0	0
1343	7.673139397	2	66	3	1	0	0	0	1	0	0	0	0	0	6.4516	2	0.5	0.5	0	0	0	0	0	0
1344	7.164704911	6	45	2	1	1	0	0	1	0	0	0	0	0	2.1316	6	0.5	0	0	0	0	0	0	0
1345	7.678303219	5	24	3	1	1	0	0	1	0	0	0	1	0	0.2116	5	0.8	0	0.2	0	0	0	0	0
1346	7.306437435	3	26	2	1	0	0	0	1	0	0	1	0	0	2.3716	3	0.333333333	0	0.333333333	0	0	0	0	0
1347	7.670484491	2	50	2	1	1	0	0	1	0	0	0	0	0	6.4516	2	1	0	0	0	0	0	0	0
1348	7.033550575	8	43	3	1	1	0	0	1	0	0	0	0	0	11.9716	8	0.375	0	0.125	0.125	0.125	0	0	0
1349	7.636081362	3	40	2	1	1	0	0	1	0	0	0	0	1	2.3716	3	0.666666667	0	0	0	0	0	0	0
1350	7.724477578	4	64	3	1	0	0	0	1	0	0	0	0	0	0.2916	4	0.5	0.25	0.25	0	0	0	0	0
1351	7.166258252	6	45	6	1	0	0	0	1	0	0	1	1	0	2.1316	6	0.666666667	0	0	0.166666667	0	0	0	0
1352	7.40781516	6	53	5	1	1	0	0	1	0	1	0	0	0	2.1316	6	0.666666667	0	0	0	0	0.333333333	0	0
1353	7.506674194	4	28	2	1	0	0	0	1	0	0	0	0	0	0.2916	4	0.25	0	0.25	0	0	0	0	0
1354	7.314419668	4	29	2	1	1	0	0	0	0	0	0	0	1	0.2916	4	0.5	0	0.25	0	0	0	0	0
1355	7.838406405	5	52	4	1	1	0	0	1	0	1	0	0	0	0.2116	5	0.4	0.2	0	0	0	0.2	0	0
1356	8.154951352	4	44	2	1	1	0	0	1	0	0	0	1	0	0.2916	4	1	0	0	0	0	0	0	0
1357	7.561548137	4	29	5	1	0	0	0	1	0	0	1	0	1	0.2916	4	0.25	0.25	0.25	0	0	0	0	0
1358	7.568792406	3	35	4	1	1	0	0	1	0	0	0	1	0	2.3716	3	0.666666667	0	0	0	0	0	0	0
1359	7.910693322	4	62	3	1	1	0	0	1	0	0	0	0	1	0.2916	4	0.75	0.25	0	0	0	0.25	0	0
1360	7.128888812	6	40	2	1	1	0	0	1	0	0	0	0	0	2.1316	6	0.333333333	0	0.166666667	0.166666667	0	0	0	0
1361	7.43660548	4	35	3	1	0	1	0	1	0	0	0	0	1	0.2916	4	0.5	0.25	0	0	0	0	0	0
1362	7.634632163	5	62	4	1	1	0	0	1	0	0	0	0	1	0.2116	5	0.8	0.2	0	0	0	0	0	0
1363	7.704645167	5	69	4	1	1	0	0	1	0	0	0	0	0	0.2116	5	0.6	0.2	0	0	0	0	0	0
1364	7.250174085	4	32	2	1	1	0	0	1	0	0	0	0	0	0.2916	4	0.5	0	0	0.25	0	0	0	0
1365	7.275781552	4	30	4	1	0	0	0	1	0	0	1	1	0	0.2916	4	0.25	0	0.25	0	0	0.25	0	0
1366	7.252379909	3	66	2	1	0	0	0	1	0	0	0	0	0	2.3716	3	0.333333333	0.333333333	0	0	0	0	0	0
1367	7.797200883	4	22	2	1	1	0	0	1	0	0	0	1	0	0.2916	4	0.75	0.25	0	0	0	0	0	0
1368	7.534858806	3	28	3	1	0	0	0	1	0	0	0	0	1	2.3716	3	0.333333333	0.333333333	0	0	0	0	0	0
1369	7.193482943	7	32	3	1	1	0	0	1	0	0	0	0	0	6.0516	7	0.285714286	0.142857143	0.285714286	0	0	0	0	0
1370	7.373863832	2	78	2	1	0	0	0	1	0	0	0	0	0	6.4516	2	0	1	0	0	0	0	0	0
1371	7.476121244	5	48	3	1	1	0	0	1	0	0	0	0	0	0.2116	5	0.6	0	0	0	0.2	0	0	0
1372	7.368005246	2	67	2	1	0	0	0	1	0	0	0	0	0	6.4516	2	0	1	0	0	0	0	0	0
1373	7.225437804	10	65	4	1	0	0	0	1	0	0	0	0	1	29.8116	10	0.5	0.1	0.1	0	0.1	0	0	0
1374	7.613507679	6	63	4	1	1	1	0	1	0	0	1	1	0	2.1316	6	0.5	0.166666667	0.166666667	0.166666667	0	0	0	0
1375	7.423866907	5	28	4	1	0	0	0	1	0	0	0	0	1	0.2116	5	0.4	0.2	0.2	0	0	0	0	0
1376	7.506448913	3	66	3	1	1	0	0	1	0	0	0	0	0	2.3716	3	0.666666667	0.333333333	0	0	0.333333333	0	0	0
1377	7.347235266	7	51	4	1	1	0	0	1	0	0	0	0	0	6.0516	7	0.571428571	0	0	0	0	0.285714286	0	0
1378	7.604221944	5	47	3	1	1	0	0	1	0	0	0	0	0	0.2116	5	0.4	0	0	0	0.2	0.2	0	0
1379	7.303035362	4	45	4	1	1	0	0	1	0	0	0	0	1	0.2916	4	0.5	0.25	0	0	0	0	0	0
1380	7.76493699	2	27	2	1	1	0	0	1	0	0	0	0	0	6.4516	2	1	0	0	0	0	0	0	0
1381	8.080939956	3	66	4	1	1	0	0	1	0	0	0	0	0	2.3716	3	0.333333333	0.333333333	0	0	0	0.333333333	0	0
1382	7.339784418	7	57	4	1	1	0	0	1	0	0	0	0	1	6.0516	7	0.571428571	0	0.142857143	0	0.142857143	0	0	0
1383	7.597210653	4	23	4	1	0	0	0	1	0	0	0	0	1	0.2916	4	0.25	0.25	0	0.25	0	0	0	0
1384	7.406534637	7	70	3	1	0	0	0	1	0	0	0	0	0	6.0516	7	0.714285714	0.285714286	0	0	0	0	0	0
1385	7.617523561	3	72	3	1	0	1	0	1	0	0	0	0	0	2.3716	3	0.333333333	0.333333333	0.333333333	0	0	0	0	0
1386	7.178164023	9	51	2	1	0	1	0	1	0	0	0	0	0	19.8916	9	0.666666667	0	0.111111111	0	0	0.111111111	0	0
1387	7.64425884	2	72	2	1	1	0	0	1	0	0	0	0	0	6.4516	2	0	1	0	0	0	0	0	0
1388	7.309038321	3	65	2	1	0	1	0	1	0	0	0	0	0	2.3716	3	0.333333333	0.333333333	0.333333333	0	0	0	0	0
1389	7.699769941	4	73	4	1	0	1	0	1	0	0	0	0	0	0.2916	4	0.5	0.25	0.25	0	0	0	0	0
1390	7.199267507	8	62	5	1	1	0	0	1	0	1	0	0	0	11.9716	8	0.25	0.125	0	0	0	0.125	0	0
1391	7.320467397	3	26	2	1	0	0	0	1	0	0	0	0	1	2.3716	3	0.333333333	0	0.666666667	0	0	0	0	0
1392	7.481899305	3	28	1	1	1	0	0	1	0	0	0	0	0	2.3716	3	0.666666667	0	0	0	0	0	0	0
1393	7.435703471	5	35	2	1	1	0	0	1	0	0	0	0	0	0.2116	5	0.4	0	0	0	0	0	0	0
1394	7.793607422	4	30	3	1	0	0	0	1	0	0	0	0	1	0.2916	4	0.25	0	0	0	0.25	0	0	0
1395	7.8502789	5	27	3	1	0	0	0	1	0	0	1	0	0	0.2116	5	0.4	0	0.2	0	0	0.2	0	0
1396	7.518547497	7	45	4	1	0	1	0	1	0	0	0	0	0	6.0516	7	0.714285714	0	0.285714286	0	0	0	0	0
1397	7.552688629	3	28	4	1	0	0	0	1	0	0	1	0	1	2.3716	3	0.333333333	0.333333333	0.333333333	0	0	0	0	0
1398	7.270862491	4	75	4	1	1	0	0	1	0	0	0	0	1	0.2916	4	0.5	0.25	0.25	0	0	0	0	0
1399	7.583318769	6	55	3	1	1	0	0	1	0	0	0	0	1	2.1316	6	0.333333333	0	0	0	0.333333333	0	0	0
1400	7.503228989	5	61	4	1	1	0	0	1	0	0	0	0	1	0.2116	5	0.6	0.2	0	0	0	0	0	0
1401	7.022627415	4	52	2	1	1	0	0	0	1	0	0	0	0	0.2916	4	0.5	0	0	0	0	0	0	0
1402	7.556992368	6	42	2	1	1	0	0	1	0	0	0	0	0	2.1316	6	0.5	0	0	0	0.166666667	0	0	0
1403	7.746261751	3	40	2	1	1	0	0	0	1	0	0	0	1	2.3716	3	0.666666667	0	0	0	0	0.333333333	0	0
1404	8.091042606	5	63	4	1	0	0	0	1	0	0	0	0	1	0.2116	5	0.6	0.2	0	0	0.2	0.2	0	0
1405	7.450538767	5	46	3	1	1	0	0	1	0	0	0	1	0	0.2116	5	0.4	0.2	0	0	0	0.2	0	0
1406	7.521723962	3	24	3	1	0	0	0	1	0	0	0	0	1	2.3716	3	0.333333333	0.333333333	0	0	0	0	0	0
1407	7.416907503	8	69	4	1	0	0	0	1	0	0	0	0	0	11.9716	8	0.5	0.25	0.125	0.125	0	0	0	0
1408	7.31151894	7	35	2	1	1	0	0	1	0	0	0	0	0	6.0516	7	0.285714286	0.142857143	0.142857143	0	0	0	0	0
1409	7.617813656	4	34	2	1	0	0	0	1	0	0	0	0	1	0.2916	4	0.25	0.25	0	0	0.25	0	0	0
1410	7.421608316	5	32	2	1	1	0	0	1	0	0	0	0	0	0.2116	5	0.4	0	0.4	0	0	0	0	0
1411	8.0714778	3	62	4	1	0	0	0	1	0	0	1	0	1	2.3716	3	0.333333333	0.333333333	0	0	0.333333333	0	0	0
1412	7.420548965	5	58	3	1	1	0	0	1	0	0	0	0	1	0.2116	5	0.8	0	0	0	0	0	0	0
1413	7.486529229	3	64	4	1	0	0	0	1	0	0	0	0	0	2.3716	3	0.666666667	0.333333333	0	0	0	0	0	0
1414	7.667410914	2	28	2	1	0	0	0	1	0	0	0	1	0	6.4516	2	0.5	0	0	0	0.5	0	0	0
1415	7.543490484	4	39	2	1	1	0	0	1	0	0	0	0	0	0.2916	4	0.5	0	0.25	0.25	0	0	0	0
1416	7.374227681	6	40	3	1	1	0	0	1	0	0	0	0	0	2.1316	6	0.333333333	0.333333333	0	0	0	0	0	0
1417	7.577490527	5	49	4	1	1	0	0	1	0	0	1	0	1	0.2116	5	0.4	0	0.2	0	0.2	0	0	0
1418	7.369625925	5	45	2	1	0	1	0	1	0	0	0	0	0	0.2116	5	0.8	0	0.2	0	0	0	0	0
1419	7.874320787	6	78	4	1	0	0	0	1	0	0	0	1	0	2.1316	6	0.5	0.166666667	0	0	0.166666667	0	0	0
1420	7.626151015	5	39	3	1	1	0	0	1	0	0	0	0	0	0.2116	5	0.4	0.2	0	0	0.2	0	0	0
1421	7.493840497	4	41	1	1	1	0	0	1	0	0	0	0	1	0.2916	4	0.5	0	0	0	0.25	0	0	0
1422	7.309901553	9	42	3	1	1	0	0	1	0	0	0	0	0	19.8916	9	0.333333333	0	0.111111111	0	0	0.222222222	0	0
1423	7.434558577	2	62	1	1	0	1	0	0	1	0	0	0	0	6.4516	2	0	0.5	0	0	0	0.5	0	0
1424	7.376026158	5	28	4	1	0	0	0	1	0	0	0	0	0	0.2116	5	0.2	0.2	0	0	0.2	0	0	0
1425	7.349989379	5	45	4	1	1	0	0	1	0	1	0	0	0	0.2116	5	0.4	0	0.4	0	0	0	0	0
1426	7.396034635	5	34	3	1	0	0	0	0	0	0	0	1	0	0.2116	5	0.4	0	0.2	0	0	0	0	0
1427	7.510693248	4	48	3	1	0	0	0	1	0	0	0	0	0	0.2916	4	0.75	0	0	0	0	0	0	0
1428	7.537978634	5	58	3	1	1	0	0	1	0	0	0	0	0	0.2116	5	0.6	0.2	0	0	0	0.2	0	0
1429	7.464721847	5	55	3	1	1	0	0	1	0	0	0	0	0	0.2116	5	0.6	0	0	0	0.4	0	0	0
1430	7.478463602	4	25	2	1	1	0	0	1	0	0	0	1	0	0.2916	4	0.5	0	0.5	0	0	0	0	0
1431	7.432957069	3	62	2	1	0	1	0	1	0	0	0	0	0	2.3716	3	0	0.333333333	0.333333333	0	0	0	0	0
1432	7.340738273	8	58	3	1	1	0	0	1	0	0	0	0	0	11.9716	8	0.75	0	0.125	0.125	0.125	0	0	0
1433	7.212714734	4	34	2	1	1	0	0	1	0	0	0	1	0	0.2916	4	0.5	0	0.25	0	0	0	0	0
1434	7.613532365	4	50	2	1	0	0	0	1	0	0	0	1	0	0.2916	4	1	0	0	0	0	0	0	0
1435	7.46960286	5	36	4	1	0	0	0	1	0	0	0	0	1	0.2116	5	0.4	0	0	0	0	0.2	0	0
1436	7.271370086	7	29	2	1	0	0	0	1	0	0	0	0	1	6.0516	7	0.571428571	0.142857143	0.142857143	0	0	0	0	0
1437	7.196731514	5	36	2	1	0	0	0	1	0	0	0	0	0	0.2116	5	0.6	0.2	0	0	0.2	0	0	0
1438	7.517031601	5	60	3	1	0	1	0	1	0	0	0	0	0	0.2116	5	0.6	0.2	0	0	0	0.2	0	0
1439	7.028423039	6	41	2	1	1	0	0	1	0	0	0	0	0	2.1316	6	0.333333333	0	0	0.166666667	0.166666667	0	0	0
1440	7.45212399	6	44	5	1	1	0	0	1	0	0	0	0	1	2.1316	6	0.5	0.166666667	0	0	0.166666667	0.166666667	0	0
1441	7.55534008	3	25	1	0	0	0	0	0	1	0	1	0	0	2.3716	0	0.333333333	0	0.333333333	0	0	0	0	0
1442	7.766374524	8	39	3	0	1	0	0	1	0	1	0	0	0	11.9716	0	0.75	0.125	0	0	0.125	0	0	0
1443	7.443435453	4	27	1	0	1	0	0	0	1	0	0	0	0	0.2916	0	0.75	0	0.25	0	0	0	0	0
1444	8.08059339	4	48	2	0	1	0	0	0	1	0	1	1	0	0.2916	0	0.75	0	0	0	0	0	0	0
1445	7.468650248	7	49	1	0	0	0	0	0	1	0	0	0	0	6.0516	0	0.571428571	0	0	0	0	0	0	0
1446	7.754421511	4	35	2	0	1	0	0	0	1	0	0	1	0	0.2916	0	0.5	0	0	0	0	0.25	0	0
1447	7.664374787	4	45	2	0	0	1	0	1	0	0	0	1	0	0.2916	0	0.75	0	0	0	0	0.25	0	0
1448	7.508161975	3	52	1	0	0	1	0	0	1	0	0	0	0	2.3716	0	1	0	0	0	0	0	0	0
1449	7.786452134	5	28	2	0	1	0	0	0	1	0	1	0	0	0.2116	0	0.4	0	0.2	0	0	0	0	0
1450	7.427697223	4	24	1	0	1	0	0	0	1	0	0	0	0	0.2916	0	0.5	0	0.5	0	0	0	0	0
1451	7.552111295	6	43	2	0	0	0	0	0	1	0	0	0	0	2.1316	0	0.666666667	0	0	0	0	0	0	0
1452	7.919137985	3	62	2	0	0	1	0	1	0	0	1	0	0	2.3716	0	0.333333333	0.333333333	0	0	0.333333333	0	0	0
1453	7.314179927	8	57	2	0	0	0	0	1	0	0	0	1	0	11.9716	0	0.625	0	0.25	0	0	0	0	0
1454	7.921081973	4	48	2	0	1	0	0	1	0	0	0	0	0	0.2916	0	0.5	0	0.25	0	0	0	0	0
1455	7.406218806	5	57	2	0	1	0	0	1	0	0	0	0	0	0.2116	0	1	0	0	0	0	0	0	0
1456	7.650872879	4	55	3	0	1	0	0	1	0	0	0	0	0	0.2916	0	1	0	0	0	0	0	0	0
1457	7.19392621	3	23	1	0	1	0	0	0	1	0	0	0	0	2.3716	0	0.666666667	0	0	0.333333333	0	0	0	0
1458	7.76207273	8	60	4	0	1	0	0	1	0	0	0	0	0	11.9716	0	0.625	0.125	0	0	0	0	0	0
1459	7.291628961	6	37	1	0	1	0	0	1	0	0	0	0	0	2.1316	0	0.333333333	0	0	0.166666667	0	0	0	0
1460	7.505530778	7	48	3	0	1	0	0	1	0	0	0	0	0	6.0516	0	0.571428571	0	0	0	0.142857143	0.142857143	0	0
1461	7.405829954	6	40	3	0	1	0	0	1	0	0	0	0	1	2.1316	0	0.333333333	0	0	0.166666667	0.166666667	0	0	0
1462	7.57475867	4	46	4	0	0	0	0	1	0	1	0	0	1	0.2916	0	0.75	0	0	0	0.25	0	0	0
1463	7.667841223	4	59	2	0	1	0	0	1	0	0	0	0	0	0.2916	0	0.75	0	0	0	0	0	0	0
1464	7.175527968	5	44	1	0	1	0	0	0	1	0	0	0	0	0.2116	0	0.4	0	0.2	0	0	0	0	0
1465	7.555444737	4	28	2	0	1	0	0	1	0	0	0	0	0	0.2916	0	0.5	0	0.25	0.25	0	0	0	0
1466	7.101750104	6	40	2	0	0	1	0	1	0	0	0	0	0	2.1316	0	0.5	0.166666667	0	0	0	0	0	0
1467	7.804006556	2	75	4	0	0	1	0	1	0	0	0	0	0	6.4516	0	0.5	0.5	0	0	0	0	0	0
1468	7.458601296	8	64	4	0	1	0	0	1	0	0	0	0	0	11.9716	0	0.75	0.125	0.125	0	0	0	0	0
1469	7.437141583	4	28	2	0	1	0	0	1	0	0	0	0	0	0.2916	0	0.5	0	0.25	0.25	0	0	0	0
1470	7.618084008	10	75	4	0	0	0	0	1	0	0	0	0	0	29.8116	0	0.5	0.1	0.1	0	0	0.2	0	0
1471	7.061788809	4	47	3	0	0	1	0	1	0	0	0	0	0	0.2916	0	0.5	0	0.25	0	0	0.25	0	0
1472	7.649759288	6	62	3	0	1	0	0	1	0	0	0	0	0	2.1316	0	0.666666667	0.166666667	0	0	0	0	0	0
1473	7.24082889	5	32	2	0	1	0	0	1	0	0	0	0	0	0.2116	0	0.4	0	0.2	0	0	0	0	0
1474	7.351293006	7	48	3	0	1	0	0	1	0	0	1	0	0	6.0516	0	0.714285714	0.142857143	0	0	0.142857143	0	0	0
1475	7.654727546	5	42	2	0	0	0	0	1	0	1	0	0	1	0.2116	0	0.4	0	0	0	0.4	0	0	0
1476	7.329060927	14	42	6	0	1	0	0	1	0	0	0	0	1	89.4916	0	0.428571429	0.071428571	0.214285714	0.142857143	0	0.071428571	0	0
1477	7.310964511	7	48	3	0	1	0	0	1	0	0	0	0	0	6.0516	0	0.714285714	0	0	0	0.285714286	0	0	0
1478	7.181508291	14	66	5	0	0	1	0	1	0	0	0	0	0	89.4916	0	0.642857143	0.071428571	0.142857143	0.142857143	0	0	0	0
1479	7.518276	8	68	5	0	0	0	0	1	0	1	0	0	1	11.9716	0	0.75	0.125	0	0	0	0	0	0
1480	7.403840799	4	35	4	0	0	0	0	0	1	1	0	0	1	0.2916	0	0.25	0	0.25	0	0.25	0	0	0
1481	7.16495237	6	66	3	0	0	1	0	1	0	0	0	0	0	2.1316	0	0.333333333	0.166666667	0.166666667	0	0	0	0	0
1482	7.216423102	4	40	2	0	1	0	0	1	0	0	0	0	0	0.2916	0	0.5	0	0	0	0	0.25	0	0
1483	7.408718428	6	61	4	0	1	0	0	1	0	0	0	0	1	2.1316	0	0.833333333	0.166666667	0	0	0	0	0	0
1484	7.573993643	4	56	2	0	1	0	0	1	0	0	0	0	0	0.2916	0	1	0	0	0	0	0	0	0
1485	7.498199521	3	71	2	0	0	0	0	1	0	0	0	0	0	2.3716	0	0.333333333	0.666666667	0	0	0	0	0	0
1486	7.529750115	4	46	2	0	1	0	0	1	0	0	0	0	0	0.2916	0	0.5	0	0	0	0	0.25	0	0
1487	7.790042385	2	68	4	0	1	0	0	1	0	0	0	1	0	6.4516	0	0	1	0	0	0	0	0	0
1488	7.307959908	5	55	3	0	1	0	0	1	0	0	0	0	1	0.2116	0	0.6	0	0	0	0	0.4	0	0
1489	7.391538532	5	48	3	0	1	0	0	1	0	0	0	0	0	0.2116	0	0.4	0	0.2	0	0.2	0.2	0	0
1490	7.344828867	6	40	3	0	1	0	0	1	0	0	0	0	1	2.1316	0	0.333333333	0	0	0	0.166666667	0.166666667	0	0
1491	7.596271754	6	78	4	0	0	0	0	1	0	0	0	0	0	2.1316	0	0.666666667	0.333333333	0	0	0	0	0	0
1492	7.739781403	5	45	3	0	1	0	0	1	0	0	0	0	0	0.2116	0	0.8	0	0	0	0	0.2	0	0
1493	7.382964088	3	56	3	0	0	1	0	1	0	0	0	0	0	2.3716	0	0.666666667	0	0.333333333	0	0	0	0	0
1494	7.797110485	3	46	3	0	1	0	0	1	0	0	0	0	0	2.3716	0	1	0	0	0	0	0	0	0
1495	7.425369806	5	38	2	0	1	0	0	0	1	0	0	0	0	0.2116	0	0.4	0	0	0	0	0	0	0
1496	7.674756828	6	42	3	0	1	0	0	1	0	0	0	0	0	2.1316	0	0.333333333	0.166666667	0.166666667	0	0	0	0	0
1497	7.508841994	8	62	3	0	1	0	0	1	0	0	0	0	0	11.9716	0	0.375	0.25	0	0	0	0.125	0	0
1498	7.190962354	7	67	2	0	1	0	0	1	0	0	0	0	0	6.0516	0	0.571428571	0.142857143	0.142857143	0	0	0	0	0
1499	7.634419437	4	53	2	0	1	0	0	1	0	0	0	0	1	0.2916	0	0.75	0	0	0	0	0	0	0
1500	7.825824429	5	54	3	0	1	0	0	1	0	0	0	0	0	0.2116	0	0.6	0	0	0	0	0	0	0
1501	7.652716618	6	43	2	1	1	0	0	1	0	0	0	0	0	2.1316	6	0.333333333	0	0	0	0	0	0	0
1502	7.504353012	5	43	2	1	1	0	0	1	0	0	0	0	1	0.2116	5	0.4	0	0	0	0.2	0	0	0
1503	7.855571809	4	39	2	1	1	0	0	1	0	0	0	0	0	0.2916	4	0.5	0	0.25	0	0	0	0	0
1504	7.823149609	5	45	2	1	1	0	0	1	0	0	0	0	0	0.2116	5	0.4	0	0.2	0	0	0	0	0
1505	7.860709611	5	38	2	1	1	0	0	1	0	0	0	0	0	0.2116	5	0.4	0	0.2	0.2	0	0	0	0
1506	7.921314272	4	60	3	1	0	1	0	1	0	0	0	0	0	0.2916	4	0.5	0.25	0	0	0	0	0	0
1507	7.446205797	8	38	2	1	1	0	0	1	0	0	0	0	0	11.9716	8	0.25	0.125	0.125	0.125	0.125	0	0	0
1508	7.85880293	5	45	2	1	1	0	0	1	0	0	0	1	0	0.2116	5	0.6	0	0.2	0	0	0	0	0
1509	7.861846485	6	38	3	1	1	0	0	1	0	0	0	1	0	2.1316	6	0.333333333	0	0.333333333	0	0	0	0	0
1510	7.657986704	6	40	2	1	1	0	0	1	0	0	0	0	0	2.1316	6	0.5	0	0.166666667	0	0	0	0	0
1511	8.030920333	6	36	4	1	0	0	0	1	0	0	0	0	0	2.1316	6	0.333333333	0	0	0	0.166666667	0.166666667	0	0
1512	7.478231874	7	52	2	1	1	0	0	1	0	0	0	0	0	6.0516	7	0.571428571	0	0.142857143	0	0.142857143	0	0	0
1513	7.845842727	3	28	3	1	1	0	0	1	0	0	0	0	0	2.3716	3	0.666666667	0	0.333333333	0	0	0	0	0
1514	7.560814571	5	74	2	1	0	0	0	1	0	0	0	0	0	0.2116	5	0.4	0.2	0.4	0	0	0	0	0
1515	7.109217479	2	74	2	1	1	1	0	1	0	0	0	0	0	6.4516	2	0.5	0.5	0	0	0	0	0	0
1516	7.452402451	6	75	4	1	0	0	0	1	0	0	1	1	0	2.1316	6	0.666666667	0.166666667	0.166666667	0	0	0	0	0
1517	7.789297204	7	68	4	1	0	1	0	1	0	0	1	0	0	6.0516	7	0.571428571	0.142857143	0.285714286	0	0	0	0	0
1518	7.757239319	6	42	4	1	1	0	0	1	0	0	0	0	0	2.1316	6	0.5	0	0	0	0.166666667	0.166666667	0	0
1519	7.94859367	6	38	4	1	1	0	0	1	0	0	0	0	0	2.1316	6	0.333333333	0	0.333333333	0	0	0	0	0
1520	8.061436392	4	35	4	1	1	0	0	1	0	0	0	1	0	0.2916	4	0.5	0	0.25	0	0.25	0	0	0
1521	7.918166392	3	65	2	1	1	0	0	1	0	0	0	0	1	2.3716	3	0.666666667	0.333333333	0	0	0	0	0	0
1522	7.820684367	5	77	3	1	0	0	0	1	0	0	0	0	0	0.2116	5	0.4	0.4	0.2	0	0	0	0	0
1523	7.737747107	5	41	2	1	1	0	0	1	0	0	0	0	0	0.2116	5	0.4	0	0.2	0	0.2	0	0	0
1524	7.964385178	5	50	2	1	1	0	0	1	0	0	0	0	0	0.2116	5	0.6	0	0	0	0	0.2	0	0
1525	7.88068718	6	40	3	1	1	0	0	1	0	0	0	0	0	2.1316	6	0.333333333	0	0	0	0	0.166666667	0	0
1526	7.863428249	3	30	2	1	0	0	1	1	0	0	0	0	0	2.3716	3	0.333333333	0	0.333333333	0	0	0	0	0
1527	8.024341727	7	60	3	1	1	0	0	1	0	0	0	0	1	6.0516	7	0.714285714	0.142857143	0	0.142857143	0	0	0	0
1528	7.365724282	6	35	2	1	1	0	0	1	0	0	0	0	0	2.1316	6	0.666666667	0	0	0	0	0.166666667	0	0
1529	8.108003154	3	72	2	1	0	0	0	1	0	0	1	0	0	2.3716	3	0.333333333	0.666666667	0	0	0	0	0	0
1530	7.652764092	8	57	3	1	1	0	0	1	0	0	0	0	1	11.9716	8	0.625	0	0.125	0	0.125	0	0	0
1531	7.951978257	5	51	2	1	1	0	0	1	0	0	0	0	0	0.2116	5	1	0	0	0	0	0	0	0
1532	7.491846234	5	30	2	1	1	0	0	1	0	0	0	1	0	0.2116	5	0.4	0	0.4	0	0	0	0	0
1533	7.873331291	4	32	2	1	1	0	0	1	0	0	0	0	0	0.2916	4	0.5	0.25	0.25	0	0	0	0	0
1534	8.211767969	3	40	2	1	1	0	0	1	0	0	0	0	0	2.3716	3	1	0	0	0	0	0	0	0
1535	7.594391308	9	42	4	1	1	0	0	1	0	0	0	0	0	19.8916	9	0.333333333	0.111111111	0	0	0	0	0	0
1536	8.196423029	5	45	2	1	1	0	0	1	0	0	0	1	0	0.2116	5	0.8	0	0	0	0	0.2	0	0
1537	7.999567835	3	29	2	1	1	0	0	1	0	0	0	0	1	2.3716	3	0.666666667	0	0	0	0	0	0	0
1538	7.745253854	8	45	2	1	1	0	0	1	0	0	0	0	0	11.9716	8	0.25	0.125	0.125	0	0	0	0	0
1539	7.855885705	5	48	2	1	1	0	0	1	0	0	0	0	0	0.2116	5	0.4	0	0.2	0	0	0	0	0
1540	7.641381995	5	45	2	1	1	0	0	1	0	0	0	1	0	0.2116	5	0.6	0	0	0	0	0.2	0	0
1541	7.715471447	14	55	6	1	1	0	0	1	0	0	0	0	1	89.4916	14	0.428571429	0.071428571	0.071428571	0.071428571	0.142857143	0	0	0
1542	7.892321292	3	62	2	1	1	0	0	1	0	0	0	1	0	2.3716	3	0.666666667	0.333333333	0	0	0	0	0	0
1543	7.809460153	5	26	3	1	0	0	0	1	0	0	0	0	1	0.2116	5	0.4	0.2	0.2	0.2	0	0	0	0
1544	7.418888855	4	38	2	1	1	0	0	1	0	0	0	0	1	0.2916	4	0.5	0	0.25	0	0	0	0	0
1545	7.674464211	7	50	4	1	1	0	0	1	0	0	0	0	0	6.0516	7	0.857142857	0	0.142857143	0	0	0	0	0
1546	7.44905579	7	55	6	1	1	0	0	1	0	0	0	0	0	6.0516	7	0.857142857	0	0.142857143	0	0	0	0	0
1547	7.664989316	5	45	3	1	1	0	0	1	0	0	0	1	0	0.2116	5	0.6	0	0	0	0	0.2	0	0
1548	7.619007568	5	41	2	1	1	0	0	1	0	0	0	0	0	0.2116	5	0.6	0	0	0	0	0	0	0
1549	7.76403695	5	80	2	1	1	0	0	1	0	0	0	0	0	0.2116	5	0.2	0.2	0	0	0.2	0	0	0
1550	7.310717257	3	37	4	1	1	0	0	1	0	0	0	0	1	2.3716	3	0.666666667	0	0	0	0	0.333333333	0	0
1551	7.683044501	7	28	2	1	1	0	0	1	0	0	0	0	0	6.0516	7	0.714285714	0	0.142857143	0	0	0	0	0
1552	7.583298414	6	46	3	1	1	0	0	1	0	0	1	0	0	2.1316	6	0.333333333	0	0	0	0.166666667	0.166666667	0	0
1553	7.626311888	9	60	3	1	1	0	0	1	0	0	0	0	0	19.8916	9	0.444444444	0.111111111	0.111111111	0	0	0.111111111	0	0
1554	8.25119433	3	62	3	1	1	0	0	1	0	0	0	1	0	2.3716	3	0.666666667	0.333333333	0	0	0	0	0	0
1555	7.730438381	5	40	3	1	1	0	0	1	0	0	0	0	0	0.2116	5	0.6	0	0	0	0.2	0	0	0
1556	7.769991012	5	50	3	1	1	0	0	1	0	0	0	0	0	0.2116	5	0.8	0	0	0	0.2	0	0	0
1557	8.134854592	6	51	4	1	1	0	0	1	0	0	0	0	0	2.1316	6	0.666666667	0	0	0	0.166666667	0	0	0
1558	7.853748492	4	57	3	1	1	0	0	1	0	0	0	1	0	0.2916	4	0.75	0	0	0	0.25	0	0	0
1559	7.706306974	5	31	2	1	1	0	0	1	0	0	0	0	0	0.2116	5	0.4	0	0.4	0.2	0	0	0	0
1560	7.513485546	9	53	4	1	1	0	0	1	0	0	0	1	0	19.8916	9	0.777777778	0	0	0.111111111	0	0.111111111	0	0
1561	8.063566721	6	90	4	1	0	0	0	1	0	0	0	1	0	2.1316	6	0.666666667	0.166666667	0	0	0	0	0	0
1562	7.546034362	6	65	4	1	1	0	0	1	0	0	0	0	0	2.1316	6	0.5	0.166666667	0.166666667	0	0	0	0	0
1563	7.920406548	4	42	3	1	0	0	0	1	0	1	0	0	0	0.2916	4	0.75	0	0	0	0.25	0	0	0
1564	7.623549078	9	27	4	1	1	0	0	1	0	0	0	0	1	19.8916	9	0.777777778	0	0	0	0	0.111111111	0	0
1565	8.054220785	4	35	2	1	0	0	0	1	0	0	0	0	0	0.2916	4	0.25	0	0	0	0	0.5	0	0
1566	7.960040867	7	44	3	1	1	0	0	1	0	0	0	0	0	6.0516	7	0.428571429	0	0	0	0	0	0	0
1567	7.677113219	10	65	7	1	0	0	0	1	0	0	0	1	0	29.8116	10	0.6	0.1	0.1	0	0	0.1	0	0
1568	8.049474949	4	55	3	1	1	0	0	1	0	0	0	0	0	0.2916	4	0.5	0	0	0	0	0.5	0	0
1569	7.913016135	6	38	4	1	1	0	0	1	0	0	1	0	0	2.1316	6	0.333333333	0.166666667	0.166666667	0.166666667	0	0	0	0
1570	7.876338606	5	45	3	1	1	0	0	1	0	0	0	1	0	0.2116	5	0.6	0	0	0	0	0	0	0
1571	7.881892188	2	65	2	1	1	1	0	1	0	0	0	0	0	6.4516	2	0.5	0.5	0	0	0	0	0	0
1572	7.797956623	7	66	4	1	1	0	0	1	0	0	1	0	0	6.0516	7	0.857142857	0.142857143	0	0	0	0	0	0
1573	7.758286478	9	60	3	1	0	0	0	1	0	0	0	0	0	19.8916	9	0.666666667	0.111111111	0	0	0.111111111	0	0	0
1574	8.601778795	2	41	4	1	0	0	0	1	0	1	0	1	0	6.4516	2	1	0	0	0	0	0	0	0
1575	7.435467518	7	35	4	1	1	0	0	1	0	0	0	0	0	6.0516	7	0.285714286	0.142857143	0.285714286	0.142857143	0	0	0	0
1576	8.153738172	4	70	5	1	1	0	0	1	0	0	0	0	1	0.2916	4	0.5	0.25	0	0	0	0	0	0
1577	7.728257317	5	50	4	1	0	1	0	1	0	0	0	0	0	0.2116	5	0.6	0	0.2	0	0	0	0	0
1578	7.957222841	8	44	5	1	1	0	0	1	0	0	0	0	1	11.9716	8	0.625	0.125	0.125	0	0	0	0	0
1579	7.912873405	7	35	4	1	0	0	0	1	0	0	0	0	1	6.0516	7	0.857142857	0	0.142857143	0	0	0	0	0
1580	7.853305739	6	34	4	1	0	0	0	1	0	0	0	0	1	2.1316	6	0.833333333	0	0	0	0.166666667	0	0	0
1581	7.936881718	4	44	2	1	1	0	0	1	0	0	0	1	0	0.2916	4	0.75	0	0	0	0	0	0	0
1582	7.76466961	6	40	4	1	1	0	0	1	0	1	0	0	1	2.1316	6	0.333333333	0	0	0	0	0	0	0
1583	7.79648569	5	48	2	1	1	0	0	1	0	0	0	0	0	0.2116	5	0.6	0	0	0	0	0	0	0
1584	7.596708678	6	70	3	1	1	0	0	1	0	0	0	0	0	2.1316	6	0.333333333	0.166666667	0.166666667	0	0	0.166666667	0	0
1585	8.197191763	5	57	3	1	1	0	0	1	0	0	0	0	0	0.2116	5	1	0	0	0	0	0	0	0
1586	7.517700182	3	50	2	1	0	1	0	1	0	0	0	1	0	2.3716	3	1	0	0	0	0	0	0	0
1587	7.811799325	4	38	2	1	1	0	0	1	0	0	0	0	0	0.2916	4	0.5	0	0.25	0	0	0	0	0
1588	8.080079509	4	80	5	1	0	1	0	1	0	1	0	0	0	0.2916	4	0.5	0.25	0.25	0	0	0	0	0
1589	7.519063139	6	33	3	1	1	0	0	1	0	0	0	1	0	2.1316	6	0.666666667	0.166666667	0.166666667	0	0	0	0	0
1590	7.808972981	6	70	4	1	0	1	0	1	0	0	0	0	0	2.1316	6	0.5	0.166666667	0.166666667	0	0.166666667	0	0	0
1591	7.835654372	11	45	4	1	0	0	0	1	0	1	0	0	0	41.7316	11	0.545454545	0.090909091	0	0.181818182	0.090909091	0	0	0
1592	7.947678571	2	35	3	1	0	0	0	1	0	0	0	0	0	6.4516	2	0.5	0	0	0	0	0.5	0	0
1593	7.979417659	2	45	2	1	0	0	0	1	0	0	0	0	0	6.4516	2	1	0	0	0	0	0	0	0
1594	7.592396385	6	48	6	1	1	0	0	1	0	0	0	0	1	2.1316	6	0.666666667	0.166666667	0	0	0.166666667	0.166666667	0	0
1595	7.939326362	5	62	4	1	1	0	0	1	0	0	0	1	0	0.2116	5	0.6	0.2	0	0	0.2	0.2	0	0
1596	7.710214159	6	67	2	1	1	0	0	1	0	0	0	1	0	2.1316	6	0.333333333	0.166666667	0	0	0	0.166666667	0	0
1597	7.90807461	6	39	5	1	0	0	0	1	0	0	1	0	0	2.1316	6	0.333333333	0	0	0	0.166666667	0.166666667	0	0
1598	7.935007611	6	45	4	1	1	0	0	1	0	0	0	1	0	2.1316	6	0.666666667	0	0	0	0.166666667	0	0	0
1599	7.845854468	3	27	2	1	0	0	0	1	0	0	0	0	0	2.3716	3	0.333333333	0	0	0	0	0.333333333	0	0
1600	7.768216126	4	35	3	1	0	0	0	1	0	0	0	1	0	0.2916	4	0.25	0	0	0	0.5	0	0	0
1601	7.946861695	3	11	2	1	0	0	0	1	0	0	0	0	0	2.3716	3	0.333333333	0.333333333	0	0	0	0.333333333	0	0
1602	8.011215796	5	47	2	1	1	0	0	1	0	0	0	0	1	0.2116	5	0.6	0	0	0	0.2	0	0	0
1603	7.752425404	5	50	3	1	0	1	0	1	0	0	0	0	0	0.2116	5	0.4	0	0	0	0	0.2	0	0
1604	7.960208439	5	62	5	1	1	0	0	1	0	0	0	0	0	0.2116	5	0.4	0.2	0.2	0.2	0	0	0	0
1605	7.695830748	6	42	2	1	1	0	0	1	0	0	0	1	0	2.1316	6	0.333333333	0	0.166666667	0	0	0	0	0
1606	7.828181448	4	41	2	1	0	1	0	1	0	0	0	0	0	0.2916	4	0.75	0	0	0.25	0	0	0	0
1607	7.880233509	2	33	1	1	0	0	0	0	0	0	0	0	0	6.4516	2	0.5	0	0	0	0.5	0	0	0
1608	7.868097345	7	47	4	1	0	0	0	1	0	0	0	0	0	6.0516	7	0.571428571	0	0	0	0.142857143	0	0	0
1609	8.058991643	3	45	4	1	0	1	0	1	0	0	0	0	0	2.3716	3	1	0	0	0	0	0	0	0
1610	7.796810468	5	41	2	1	1	0	0	1	0	0	0	1	0	0.2116	5	0.4	0	0.2	0	0.2	0	0	0
1611	7.833829991	5	34	3	1	1	0	0	1	0	0	0	1	0	0.2116	5	0.4	0	0.2	0	0	0	0	0
1612	7.91767842	6	45	4	1	1	0	0	1	0	1	0	0	1	2.1316	6	0.5	0.166666667	0	0	0.166666667	0	0	0
1613	8.0673435	3	58	2	1	1	0	0	1	0	1	0	0	0	2.3716	3	0.666666667	0	0	0	0	0	0	0
1614	7.919563442	5	32	3	1	1	0	0	1	0	0	0	0	1	0.2116	5	0.4	0	0.2	0	0	0	0	0
1615	8.192271589	3	48	7	1	0	1	0	1	0	1	0	0	0	2.3716	3	0.666666667	0	0.333333333	0	0	0	0	0
1616	8.060672655	4	22	3	1	0	0	0	1	0	0	0	0	1	0.2916	4	1	0	0	0	0	0	0	0
1617	7.942340915	4	48	2	1	1	0	0	1	0	0	0	0	0	0.2916	4	0.75	0	0	0	0.25	0	0	0
1618	7.888240723	6	58	5	1	1	0	0	1	0	0	0	0	0	2.1316	6	0.666666667	0	0	0	0	0.166666667	0	0
1619	7.99508752	5	35	2	1	1	0	0	1	0	0	0	0	0	0.2116	5	0.4	0	0	0	0.2	0	0	0
1620	7.794394724	4	32	2	1	0	0	0	1	0	0	0	1	0	0.2916	4	0.25	0	0	0	0	0.25	0	0
1621	7.915198468	4	49	3	1	1	0	0	1	0	0	1	0	0	0.2916	4	0.75	0	0	0	0	0.25	0	0
1622	8.46168471	2	45	2	1	1	0	0	1	0	1	0	0	1	6.4516	2	1	0	0	0	0	0	0	0
1623	7.910539254	4	38	2	1	1	0	0	1	0	0	0	0	0	0.2916	4	0.75	0	0	0	0.25	0	0	0
1624	8.192728179	5	58	2	1	1	0	0	1	0	0	0	1	0	0.2116	5	1	0	0	0	0	0	0	0
1625	7.730684331	6	72	6	1	0	0	0	1	0	1	0	0	0	2.1316	6	0.333333333	0.333333333	0.166666667	0.166666667	0	0	0	0
1626	7.568131303	10	52	2	1	1	0	0	1	0	0	0	0	1	29.8116	10	0.7	0.1	0	0	0.1	0	0	0
1627	7.649749765	5	36	2	1	0	0	0	1	0	0	0	0	1	0.2116	5	0.2	0	0.4	0	0.2	0	0	0
1628	7.953075786	3	32	2	1	1	0	0	1	0	0	0	0	1	2.3716	3	0.666666667	0	0.333333333	0	0	0	0	0
1629	7.554868992	5	46	2	1	1	0	0	1	0	0	0	1	0	0.2116	5	0.8	0.2	0	0	0	0	0	0
1630	7.803884119	4	52	3	1	1	0	0	1	0	0	0	0	1	0.2916	4	1	0	0	0	0	0	0	0
1631	7.879601808	5	55	5	1	1	0	0	1	0	0	0	0	1	0.2116	5	1	0	0	0	0	0	0	0
1632	8.070534145	4	66	2	1	1	0	0	1	0	0	0	0	1	0.2916	4	0.75	0.25	0	0	0	0	0	0
1633	8.047173562	4	69	3	1	0	0	0	1	0	0	1	0	0	0.2916	4	0.75	0.25	0	0	0	0	0	0
1634	7.516656347	6	23	2	1	1	0	0	1	0	0	0	0	0	2.1316	6	0.833333333	0	0.166666667	0	0	0	0	0
1635	8.135595966	4	52	2	1	1	0	0	1	0	0	0	1	0	0.2916	4	1	0	0	0	0	0	0	0
1636	7.917871453	5	39	2	1	1	0	0	1	0	0	0	0	0	0.2116	5	0.4	0.2	0.2	0	0	0	0	0
1637	7.926992415	5	33	3	1	1	0	0	1	0	0	0	1	0	0.2116	5	0.8	0	0.2	0	0	0	0	0
1638	7.875537286	2	40	2	1	1	0	1	1	0	0	1	0	0	6.4516	2	0.5	0.5	0	0	0	0	0	0
1639	7.88730997	3	54	3	1	1	0	0	0	1	0	0	0	0	2.3716	3	1	0	0	0	0	0	0	0
1640	7.678932374	5	65	3	1	1	0	0	1	0	0	0	1	0	0.2116	5	0.6	0.2	0.2	0	0	0	0	0
1641	7.912558594	3	45	2	1	1	0	0	0	1	0	0	0	1	2.3716	3	0.666666667	0	0	0	0.333333333	0	0	0
1642	7.812082735	5	72	2	1	1	1	0	1	0	0	0	1	0	0.2116	5	0.4	0.2	0.2	0	0	0.2	0	0
1643	7.687341589	4	32	4	1	0	0	0	1	0	0	1	0	1	0.2916	4	0.25	0	0	0	0.5	0	0	0
1644	8.153801455	1	51	2	1	1	1	0	1	0	0	0	0	1	12.5316	1	1	0	0	0	0	0	0	0
1645	7.587173649	2	70	2	1	0	0	0	1	0	0	0	0	0	6.4516	2	0.5	0.5	0	0	0	0	0	0
1646	8.09878873	3	48	2	1	1	0	0	1	0	0	0	0	1	2.3716	3	1	0	0	0	0	0	0	0
1647	7.729475957	2	60	2	1	0	0	0	1	0	1	0	0	1	6.4516	2	0.5	0.5	0	0	0	0	0	0
1648	8.050260043	3	42	2	1	1	0	0	0	1	0	0	0	1	2.3716	3	0.666666667	0.333333333	0	0	0	0	0	0
1649	7.794184563	3	63	2	1	1	0	0	1	0	0	0	0	0	2.3716	3	0.666666667	0.333333333	0	0	0	0	0	0
1650	8.109288109	2	59	2	1	0	1	0	1	0	0	1	0	1	6.4516	2	1	0	0	0	0	0	0	0
1651	7.780557966	2	48	2	1	0	0	0	1	0	0	0	0	0	6.4516	2	1	0	0	0	0.5	0	0	0
1652	7.674073922	8	63	3	1	1	0	0	1	0	0	0	0	0	11.9716	8	0.625	0.125	0	0.125	0	0	0	0
1653	7.996451903	3	42	6	1	1	0	0	1	0	0	1	1	0	2.3716	3	1	0	0	0	0.333333333	0	0	0
1654	7.629893139	3	25	2	1	0	0	0	0	1	0	0	0	0	2.3716	3	0.333333333	0	0.333333333	0	0	0	0	0
1655	7.721871526	7	52	4	1	1	0	0	1	0	0	0	0	0	6.0516	7	0.571428571	0	0.142857143	0	0	0	0	0
1656	7.787788583	7	46	4	1	1	0	0	1	0	0	0	0	0	6.0516	7	0.571428571	0.142857143	0	0	0.142857143	0	0	0
1657	7.669700645	4	36	1	1	1	0	0	1	0	0	0	0	0	0.2916	4	0.5	0	0	0	0	0	0	0
1658	7.909537233	2	56	2	1	1	0	0	1	0	0	0	0	1	6.4516	2	1	0	0	0	0	0	0	0
1659	7.80500997	2	56	2	1	0	1	0	1	0	0	0	0	0	6.4516	2	1	0	0	0	0	0	0	0
1660	7.773034782	5	36	2	1	1	0	0	1	0	0	1	0	0	0.2116	5	0.4	0.2	0	0	0	0	0	0
1661	8.062981018	6	59	4	1	0	1	0	1	0	0	0	0	0	2.1316	6	0.833333333	0	0	0.166666667	0	0	0	0
1662	8.118823849	3	60	3	1	1	0	0	1	0	1	0	1	0	2.3716	3	0.666666667	0.333333333	0	0	0	0	0	0
1663	8.019366053	3	36	2	1	0	1	0	1	0	0	0	0	0	2.3716	3	1	0	0	0	0	0	0	0
1664	7.559079965	4	33	1	1	1	1	0	0	1	0	0	0	0	0.2916	4	0.5	0	0	0	0	0	0	0
1665	8.107825478	1	51	1	1	1	1	0	0	0	0	0	0	0	12.5316	1	1	0	0	0	0	0	0	0
1666	7.809046072	4	30	2	1	1	0	0	1	0	0	0	1	0	0.2916	4	0.5	0	0.5	0	0	0	0	0
1667	8.104694405	5	78	4	1	0	0	0	0	0	0	0	0	0	0.2116	5	0.6	0.2	0	0	0	0.2	0	0
1668	7.812455095	6	52	1	1	1	0	0	1	0	0	0	0	0	2.1316	6	0.333333333	0	0	0	0	0	0	0
1669	7.61583048	6	72	3	1	0	1	0	1	0	0	0	0	0	2.1316	6	0.666666667	0.166666667	0.166666667	0	0	0	0	0
1670	7.824297979	4	50	2	1	1	0	0	1	0	0	0	0	0	0.2916	4	0.75	0	0	0	0	0.25	0	0
1671	7.778718046	5	36	4	1	1	0	0	0	0	0	0	0	0	0.2116	5	0.4	0	0	0	0.2	0	0	0
1672	7.83947044	6	60	7	1	0	1	0	1	0	0	0	1	0	2.1316	6	0.666666667	0.166666667	0.166666667	0	0	0	0	0
1673	7.712542219	3	56	2	1	1	0	0	1	0	0	0	0	0	2.3716	3	1	0	0	0	0	0	0	0
1674	8.028272559	4	67	3	1	1	0	0	0	0	0	0	1	0	0.2916	4	0.5	0.25	0	0	0	0	0	0
1675	7.964524218	5	60	4	1	1	0	0	1	0	0	0	0	0	0.2116	5	0.6	0.2	0	0	0.2	0.2	0	0
1676	8.007716657	4	29	3	1	0	0	0	1	0	0	0	0	0	0.2916	4	0.25	0	0	0	0	0.25	0	0
1677	7.948717268	2	41	2	1	0	0	1	1	0	0	0	0	0	6.4516	2	1	0	0	0	0	0	0	0
1678	8.101116984	4	70	3	1	0	0	0	1	0	0	0	0	0	0.2916	4	0.75	0.25	0	0	0	0	0	0
1679	7.906060926	6	41	1	1	1	0	0	1	0	0	0	0	0	2.1316	6	0.5	0	0.166666667	0	0	0	0	0
1680	7.950935897	7	55	4	1	0	0	0	1	0	0	0	1	0	6.0516	7	0.428571429	0	0	0	0	0	0	0
1681	7.691035625	6	35	3	1	1	0	0	1	0	0	0	1	0	2.1316	6	0.333333333	0.166666667	0.166666667	0	0	0	0	0
1682	7.972090083	6	54	4	1	0	0	0	1	0	0	0	0	0	2.1316	6	0.666666667	0	0.166666667	0	0	0	0	0
1683	7.732272769	6	65	3	1	0	0	0	1	0	1	0	0	0	2.1316	6	0.5	0.166666667	0	0	0	0.166666667	0	0
1684	7.367727512	3	70	4	1	0	1	0	1	0	0	0	0	0	2.3716	3	0.333333333	0.333333333	0	0.333333333	0	0	0	0
1685	7.665425356	8	58	3	1	1	0	0	1	0	0	0	1	0	11.9716	8	0.5	0	0	0	0	0	0	0
1686	7.741507525	6	40	3	1	1	0	0	1	0	0	0	0	1	2.1316	6	0.333333333	0	0.166666667	0	0	0	0	0
1687	7.626843074	5	46	2	1	1	0	0	1	0	0	0	0	0	0.2116	5	0.6	0	0	0.2	0	0	0	0
1688	7.2329571	7	38	4	1	1	0	0	1	0	0	0	0	0	6.0516	7	0.285714286	0	0.142857143	0	0	0	0	0
1689	7.784069492	5	42	2	1	1	0	0	1	0	0	0	0	0	0.2116	5	0.4	0	0.2	0	0	0	0	0
1690	7.652441224	4	34	3	1	1	0	0	1	0	0	0	0	0	0.2916	4	0.5	0	0.25	0	0	0	0	0
1691	8.044064685	3	80	2	1	1	0	0	1	0	0	0	0	0	2.3716	3	0.666666667	0.333333333	0	0	0	0	0	0
1692	7.945973336	8	64	7	1	0	0	0	1	0	0	1	0	0	11.9716	8	0.5	0.125	0.125	0	0	0	0	0
1693	7.708163668	10	65	3	1	0	1	0	1	0	0	0	0	0	29.8116	10	0.4	0.1	0.2	0.1	0	0	0	0
1694	7.852994918	6	45	4	1	1	0	0	1	0	0	0	0	0	2.1316	6	0.333333333	0	0.166666667	0	0	0.166666667	0	0
1695	7.767208957	4	28	4	1	1	0	0	1	0	0	0	0	0	0.2916	4	0.5	0.25	0.25	0	0	0	0	0
1696	7.981644455	4	60	4	1	1	0	0	1	0	0	1	0	0	0.2916	4	0.5	0.25	0	0	0	0	0	0
1697	7.727852241	6	32	3	1	0	0	0	1	0	0	0	0	0	2.1316	6	0.166666667	0	0.166666667	0.166666667	0.166666667	0	0	0
1698	7.912825823	6	39	4	1	1	0	0	1	0	0	0	1	0	2.1316	6	0.5	0	0	0.166666667	0	0	0	0
1699	7.416889473	4	70	3	1	0	1	0	1	0	0	0	0	0	0.2916	4	0.5	0.25	0	0.25	0	0	0	0
1700	7.748196831	8	58	5	1	0	0	0	1	0	0	0	1	0	11.9716	8	0.625	0	0	0.125	0	0	0	0
1701	7.654495358	5	28	3	0	1	0	0	0	0	0	0	0	0	0.2116	0	0.4	0.2	0.4	0	0	0	0	0
1702	8.098192895	4	42	2	0	1	0	0	0	1	1	0	0	1	0.2916	0	0.5	0	0	0	0.5	0	0	0
1703	7.710805642	3	14	2	0	1	0	0	0	1	0	0	0	0	2.3716	0	0.333333333	0	0	0	0	0	0	0
1704	8.118883423	4	46	2	0	1	0	0	1	0	0	0	1	0	0.2916	0	0.5	0	0	0	0.25	0.25	0	0
1705	7.697334737	4	63	1	0	1	0	0	0	1	0	0	0	0	0.2916	0	0.5	0.25	0.25	0	0	0	0	0
1706	8.024950497	5	42	5	0	1	0	0	1	0	0	0	0	0	0.2116	0	0.6	0	0.2	0	0.2	0	0	0
1707	7.778198912	6	62	3	0	0	1	0	1	0	0	0	1	0	2.1316	0	0.5	0.166666667	0.166666667	0	0	0	0	0
1708	8.044937428	1	29	1	0	1	0	0	0	1	0	0	0	1	12.5316	0	1	0	0	0	0	0	0	0
1709	7.863178259	4	64	2	0	1	0	0	1	0	0	0	0	0	0.2916	0	0.5	0.5	0	0	0	0	0	0
1710	7.761685383	8	52	2	0	1	0	0	1	0	0	0	1	0	11.9716	0	0.875	0	0.125	0	0	0	0	0
1711	7.846851967	4	30	2	0	1	0	0	1	0	0	0	0	0	0.2916	0	0.5	0.25	0.25	0	0	0	0	0
1712	7.672632249	5	39	2	0	1	0	0	1	0	0	0	0	0	0.2116	0	0.4	0	0.2	0	0.2	0	0	0
1713	7.83851286	5	50	2	0	1	0	0	1	0	0	0	0	0	0.2116	0	0.8	0	0	0	0	0	0	0
1714	7.99287022	4	41	3	0	1	1	0	1	0	0	0	0	0	0.2916	0	0.5	0	0	0	0	0.25	0	0
1715	7.68142659	5	43	2	0	1	0	0	1	0	0	0	1	0	0.2116	0	0.6	0	0.2	0	0	0.2	0	0
1716	7.833754728	4	35	2	0	1	0	0	0	1	0	1	0	0	0.2916	0	0.5	0	0	0.25	0	0	0	0
1717	7.588920967	5	50	1	0	1	0	0	0	1	0	0	0	0	0.2116	0	0.4	0	0	0	0.2	0	0	0
1718	7.393564588	5	30	1	0	1	0	0	0	1	0	0	0	0	0.2116	0	0.4	0	0.4	0	0	0	0	0
1719	7.621043265	5	33	2	0	1	0	0	1	0	0	0	0	0	0.2116	0	0.4	0	0.4	0	0.2	0	0	0
1720	8.230878184	1	47	3	0	0	1	0	1	0	0	0	0	0	12.5316	0	1	0	0	0	0	0	0	0
1721	8.082263227	5	60	6	0	0	0	0	1	0	0	0	1	0	0.2116	0	0.8	0.2	0	0	0	0.2	0	0
1722	8.593005425	3	65	7	0	0	0	0	1	0	0	0	1	0	2.3716	0	0.333333333	0.333333333	0	0	0	0	0	0
1723	7.562681247	12	64	7	0	0	0	0	1	0	0	0	0	0	55.6516	0	0.583333333	0.083333333	0.083333333	0	0.083333333	0	0	0
1724	7.887989355	5	35	4	0	1	0	0	1	0	0	0	1	0	0.2116	0	0.4	0	0	0.2	0	0.2	0	0
1725	7.64008471	5	48	4	0	1	0	0	1	0	0	0	0	0	0.2116	0	0.8	0	0	0	0	0.2	0	0
1726	7.302496424	7	40	3	0	1	0	0	1	0	0	0	1	0	6.0516	0	0.285714286	0	0.142857143	0	0.142857143	0	0	0
1727	7.666404579	6	45	3	0	1	0	0	1	0	0	0	0	0	2.1316	0	0.5	0	0.166666667	0	0.166666667	0	0	0
1728	8.166094102	5	40	4	0	1	0	0	1	0	0	0	0	0	0.2116	0	0.6	0	0	0	0	0	0	0
1729	8.170018689	3	26	4	0	0	0	0	1	0	0	0	0	1	2.3716	0	1	0	0	0	0	0	0	0
1730	7.729049382	6	40	4	0	1	0	0	1	0	0	0	0	0	2.1316	0	0.666666667	0	0.166666667	0	0	0.166666667	0	0
1731	7.787485756	8	32	6	0	0	0	0	1	0	0	1	1	0	11.9716	0	0.5	0.125	0.25	0	0	0	0	0
1732	7.666882129	6	30	9	0	0	0	0	1	0	0	1	0	1	2.1316	0	0.333333333	0	0.333333333	0.166666667	0	0	0	0
1733	7.559601184	8	48	2	0	1	0	0	1	0	0	0	0	0	11.9716	0	0.375	0	0.25	0	0.125	0	0	0
1734	7.387319312	4	65	3	0	0	0	0	1	0	0	0	0	0	0.2916	0	0.5	0.25	0	0	0	0	0	0
1735	7.704473876	4	50	4	0	0	0	0	1	0	0	1	0	0	0.2916	0	0.75	0	0	0	0	0	0	0
1736	7.73564749	3	40	3	0	0	0	0	1	0	0	0	0	0	2.3716	0	0.333333333	0	0	0	0.333333333	0	0	0
1737	7.484919054	4	31	6	0	1	0	0	1	0	0	0	0	1	0.2916	0	0.5	0	0	0.25	0	0	0	0
1738	7.135599764	3	50	3	0	0	1	0	1	0	0	0	0	0	2.3716	0	1	0	0	0	0	0	0	0
1739	8.049340846	2	65	4	0	1	0	0	1	0	0	1	1	0	6.4516	0	0.5	0.5	0	0	0	0	0	0
1740	7.895018788	6	55	9	0	0	1	0	1	0	0	1	1	0	2.1316	0	0.5	0	0	0.166666667	0.166666667	0	0	0
1741	7.849074177	3	28	1	0	1	0	0	0	1	0	1	0	0	2.3716	0	0.666666667	0	0.333333333	0	0	0	0	0
1742	7.395555849	3	28	1	0	1	0	0	0	1	0	1	1	0	2.3716	0	0.666666667	0	0.333333333	0	0	0	0	0
1743	8.071574615	3	34	1	0	1	0	0	0	1	0	1	0	0	2.3716	0	1	0	0	0	0	0	0	0
1744	7.65391228	4	35	1	0	1	0	0	0	1	0	1	1	0	0.2916	0	0.5	0	0	0	0	0	0	0
1745	7.657693862	4	37	1	0	1	0	0	0	1	0	1	0	0	0.2916	0	0.5	0	0	0	0.25	0	0	0
1746	7.8113376	4	28	1	0	1	0	0	1	0	0	0	0	0	0.2916	0	0.5	0	0	0.25	0	0	0	0
1747	8.08231575	2	22	1	0	1	0	0	0	1	0	1	0	0	6.4516	0	1	0	0	0	0	0	0	0
1748	7.797529536	3	30	1	0	1	0	0	1	0	0	0	1	0	2.3716	0	0.666666667	0	0.333333333	0	0	0	0	0
1749	8.050224951	3	52	2	0	1	0	0	0	1	0	1	1	0	2.3716	0	1	0	0	0	0.333333333	0	0	0
1750	7.618457465	5	42	3	0	1	0	0	1	0	0	1	1	0	0.2116	0	0.6	0.2	0	0	0.2	0	0	0
1751	8.09524803	2	30	2	0	1	0	0	0	1	0	0	0	1	6.4516	0	1	0	0	0	0	0	0	0
1752	7.858980629	2	18	1	0	1	0	0	1	0	0	0	0	0	6.4516	0	1	0	0	0	0	0	0	0
1753	7.869359663	4	35	2	0	1	0	0	1	0	0	0	1	0	0.2916	0	0.75	0	0	0	0	0	0	0
1754	8.037035787	2	35	1	0	1	0	0	0	1	0	0	0	0	6.4516	0	1	0	0	0	0	0	0	0
1755	6.924750046	6	35	1	0	1	0	0	1	0	0	0	0	0	2.1316	0	0.333333333	0	0	0	0	0	0	0
1756	7.928849171	3	42	1	0	1	0	0	0	1	0	0	0	0	2.3716	0	1	0	0	0	0	0	0	0
1757	7.919210726	2	35	1	0	1	0	0	0	1	0	0	1	0	6.4516	0	1	0	0	0	0	0	0	0
1758	7.64643972	4	50	4	0	0	0	0	1	0	1	0	0	1	0.2916	0	0.75	0	0	0	0	0.5	0	0
1759	7.757803639	4	30	1	0	1	0	1	0	1	0	0	0	0	0.2916	0	0.25	0	0.25	0	0.25	0	0	0
1760	7.502158892	4	36	2	0	1	0	0	0	1	0	0	1	0	0.2916	0	0.5	0	0	0.25	0	0	0	0
1761	7.496940965	3	26	2	0	1	0	0	0	1	0	0	0	1	2.3716	0	0.666666667	0	0.333333333	0	0	0	0	0
1762	7.862331672	4	32	2	0	1	0	0	0	1	0	0	0	0	0.2916	0	0.5	0	0	0	0	0	0	0
1763	8.053550091	3	65	2	0	0	0	0	0	1	0	0	0	0	2.3716	0	0.666666667	0.333333333	0	0	0	0	0	0
1764	7.679427092	4	41	2	0	1	0	0	0	1	0	0	0	0	0.2916	0	0.5	0	0	0	0	0	0	0
1765	7.800736441	4	40	2	0	1	0	0	0	1	1	0	0	0	0.2916	0	0.5	0	0	0	0	0	0	0
1766	7.996529331	3	35	3	0	1	0	0	0	1	1	0	0	1	2.3716	0	0.666666667	0	0	0	0	0	0	0
1767	7.806101975	5	40	3	0	1	0	0	1	0	0	0	0	0	0.2116	0	0.4	0.2	0.2	0	0	0	0	0
1768	8.184223613	2	40	1	0	1	0	0	1	0	0	1	1	0	6.4516	0	1	0	0	0	0	0	0	0
1769	7.524048413	3	30	5	0	0	0	0	1	0	1	0	0	0	2.3716	0	0.333333333	0	0.333333333	0	0	0	0	0
1770	7.883951315	5	40	3	0	1	0	0	0	1	0	1	1	0	0.2116	0	0.8	0	0.2	0	0	0	0	0
1771	7.724367102	5	42	3	0	1	0	0	0	1	0	1	0	1	0.2116	0	0.4	0	0.2	0	0	0	0	0
1772	7.787788583	3	35	1	0	1	0	0	0	1	0	1	0	0	2.3716	0	0.666666667	0	0	0	0	0.333333333	0	0
1773	7.829658233	6	55	3	0	1	0	0	0	1	1	0	0	1	2.1316	0	0.666666667	0	0.166666667	0	0	0.166666667	0	0
1774	7.407153862	4	55	4	0	0	0	0	0	1	1	0	0	0	0.2916	0	1	0	0	0	0	0	0	0
1775	7.581281216	3	35	2	0	1	0	0	0	1	0	0	0	0	2.3716	0	0.666666667	0	0.333333333	0	0	0	0	0
1776	7.615554591	5	49	4	0	1	0	0	0	1	0	0	1	0	0.2116	0	0.8	0	0.2	0	0	0	0	0
1777	7.744335915	4	33	2	0	1	0	0	0	1	0	0	0	0	0.2916	0	0.5	0	0.5	0	0	0	0	0
1778	7.791667437	5	55	2	0	1	0	0	0	1	0	1	0	0	0.2116	0	1	0	0	0	0	0	0	0
1779	8.030344477	4	21	2	0	1	0	0	0	1	0	0	0	0	0.2916	0	1	0	0	0	0	0	0	0
1780	7.357320204	7	28	3	0	1	0	0	1	0	0	1	1	0	6.0516	0	0.571428571	0	0.142857143	0	0	0	0	0
1781	7.920624477	3	54	1	0	1	0	0	0	1	0	1	0	0	2.3716	0	1	0	0	0	0	0	0	0
1782	7.741611779	2	27	1	0	1	0	0	0	1	0	1	0	1	6.4516	0	1	0	0	0	0	0	0	0
1783	8.04452682	1	55	1	0	1	1	0	0	1	0	0	0	0	12.5316	0	1	0	0	0	0	0	0	0
1784	8.129369553	3	30	1	0	1	0	0	0	1	1	0	1	0	2.3716	0	1	0	0	0	0	0	0	0
1785	7.49621394	8	64	5	0	1	0	0	0	1	0	0	0	0	11.9716	0	0.625	0.125	0.125	0.125	0	0	0	0
1786	7.871299757	2	29	1	0	1	0	0	0	1	0	1	0	0	6.4516	0	1	0	0	0	0	0	0	0
1787	7.428564896	6	36	1	0	1	0	0	0	1	1	0	0	0	2.1316	0	0.333333333	0.166666667	0.5	0	0	0	0	0
1788	7.908162869	3	47	1	0	1	0	0	0	1	1	0	0	0	2.3716	0	1	0	0	0	0	0	0	0
1789	7.924944185	2	26	1	0	1	0	0	0	1	1	0	0	1	6.4516	0	1	0	0	0	0	0	0	0
1790	7.675615606	4	32	1	0	1	0	0	0	1	0	1	1	0	0.2916	0	0.5	0	0.25	0	0	0	0	0
1791	7.841634424	4	39	1	0	1	0	0	0	1	1	0	0	1	0.2916	0	0.5	0	0.25	0	0	0	0	0
1792	7.640978576	3	59	1	0	1	0	0	0	1	1	0	0	0	2.3716	0	1	0	0	0	0	0	0	0
1793	8.052379272	3	35	1	0	1	0	0	0	1	1	0	0	1	2.3716	0	0.666666667	0	0	0	0	0.333333333	0	0
1794	7.69238715	5	35	1	0	1	0	0	0	1	1	0	1	0	0.2116	0	1	0	0	0	0	0.2	0	0
1795	7.778454326	3	24	1	0	0	1	0	0	1	0	1	0	0	2.3716	0	0.333333333	0	0	0	0.333333333	0	0	0
1796	7.997945535	3	40	1	0	1	0	0	0	1	0	1	0	1	2.3716	0	1	0	0	0	0	0.333333333	0	0
1797	7.597401338	5	45	3	0	1	0	0	0	1	0	1	0	0	0.2116	0	0.4	0.2	0	0	0.2	0	0	0
1798	7.603414302	7	40	1	0	1	0	0	0	1	0	0	0	0	6.0516	0	0.285714286	0	0.285714286	0.142857143	0	0	0	0
1799	7.88562265	2	25	1	0	1	0	0	0	1	0	0	0	1	6.4516	0	1	0	0	0	0	0	0	0
1800	7.652170504	2	32	1	0	1	0	0	0	1	0	0	0	0	6.4516	0	1	0	0	0	0	0	0	0
1801	7.977535901	4	45	6	0	1	0	0	1	0	1	0	0	1	0.2916	0	0.5	0	0	0.25	0	0.25	0	0
1802	7.661889369	6	44	7	0	1	0	0	1	0	1	0	0	1	2.1316	0	0.5	0	0.166666667	0	0.166666667	0	0	0
1803	8.029670597	4	55	4	0	1	0	0	0	1	1	0	0	1	0.2916	0	0.75	0	0	0	0	0.25	0	0
1804	7.606949141	6	70	4	0	0	0	0	1	0	1	0	0	1	2.1316	0	0.666666667	0.166666667	0.166666667	0	0	0	0	0
1805	8.501429596	6	38	6	0	1	0	0	0	1	1	0	0	1	2.1316	0	0.5	0.166666667	0.166666667	0	0	0	0	0
1806	7.69405577	5	48	6	0	0	0	0	0	1	1	0	0	1	0.2116	0	0.8	0	0	0	0.2	0.2	0	0
1807	7.889421681	4	55	3	0	0	0	0	0	1	1	0	0	1	0.2916	0	1	0	0	0	0	0	0	0
1808	7.990167045	5	44	5	0	0	0	0	0	1	1	0	0	1	0.2116	0	0.6	0	0	0	0.2	0.2	0	0
1809	7.499185299	12	40	8	0	1	0	0	1	0	1	0	0	1	55.6516	0	0.75	0	0.166666667	0	0	0	0	0
1810	7.986402927	5	39	6	0	0	0	0	1	0	1	0	0	1	0.2116	0	0.4	0	0	0	0.4	0	0	0
1811	7.84603057	4	51	2	0	1	0	0	0	1	1	0	0	1	0.2916	0	0.5	0	0	0	0.25	0	0	0
1812	7.942291162	4	59	6	0	1	0	0	0	0	1	0	0	1	0.2916	0	1	0	0	0	0	0	0	0
1813	7.664567162	5	42	5	0	1	0	0	0	1	1	0	0	1	0.2116	0	0.4	0.2	0	0	0	0	0	0
1814	8.359818654	5	52	6	0	0	0	0	0	1	1	0	0	1	0.2116	0	1	0	0	0	0	0	0	0
1815	7.875225699	4	33	3	0	1	0	0	0	1	0	1	1	0	0.2916	0	0.5	0	0	0	0	0.25	0	0
1816	7.937103231	4	54	4	0	1	0	0	0	0	1	0	0	1	0.2916	0	1	0	0	0	0.25	0	0	0
1817	8.108545023	2	58	4	0	0	0	0	0	1	1	0	0	1	6.4516	0	1	0	0	0	0	0	0	0
1818	7.80056037	5	45	5	0	1	0	0	0	1	1	0	0	1	0.2116	0	0.6	0	0	0	0	0	0	0
1819	8.131865949	3	37	6	0	1	0	0	0	0	1	0	0	1	2.3716	0	0.666666667	0	0.333333333	0	0	0	0	0
1820	7.917470778	6	52	6	0	0	1	0	0	1	1	0	0	1	2.1316	0	0.666666667	0	0.166666667	0	0	0	0	0
1821	7.795831704	5	48	2	0	1	0	0	1	0	0	1	0	0	0.2116	0	0.6	0	0	0	0.2	0	0	0
1822	7.550861013	5	55	3	0	0	1	0	1	0	0	1	0	0	0.2116	0	0.8	0	0	0	0	0	0	0
1823	7.718494366	4	27	3	0	0	0	0	1	0	1	0	0	1	0.2916	0	0.25	0.25	0	0	0	0.25	0	0
1824	7.557493789	4	38	3	0	1	0	0	0	0	0	0	0	0	0.2916	0	0.75	0	0	0	0	0	0	0
1825	7.644818861	5	65	2	0	1	0	0	1	0	0	1	0	0	0.2116	0	0.6	0.2	0	0	0	0	0	0
1826	7.563854584	4	35	1	0	1	0	0	0	1	0	0	0	0	0.2916	0	0.5	0	0	0	0.25	0	0	0
1827	7.605367477	3	44	5	0	1	0	0	0	1	1	0	0	1	2.3716	0	0.666666667	0	0	0	0	0.333333333	0	0
1828	7.517064225	6	38	3	0	1	0	0	1	0	1	0	1	0	2.1316	0	0.833333333	0	0	0	0	0	0	0
1829	7.788000093	5	60	4	0	0	0	0	1	0	0	1	0	0	0.2116	0	0.6	0.4	0	0	0	0	0	0
1830	7.58910818	3	55	3	0	0	1	0	1	0	0	1	0	0	2.3716	0	1	0	0	0	0	0	0	0
1831	7.44231696	4	35	2	0	1	0	0	1	0	1	0	0	1	0.2916	0	0.5	0	0.25	0	0	0	0	0
1832	8.239815183	9	74	8	0	0	0	0	1	0	1	0	0	1	19.8916	0	0.444444444	0.222222222	0	0	0	0	0	0
1833	7.553779405	6	69	4	0	0	0	0	0	1	1	0	0	1	2.1316	0	0.5	0.333333333	0.166666667	0	0	0	0	0
1834	7.790588499	9	65	6	0	0	0	0	0	1	1	0	0	1	19.8916	0	0.666666667	0.111111111	0.111111111	0.111111111	0	0	0	0
1835	7.9398217	3	48	2	0	1	0	0	0	1	1	0	0	1	2.3716	0	0.666666667	0	0	0	0.333333333	0	0	0
1836	8.09364863	6	52	6	0	1	0	0	0	1	1	0	0	1	2.1316	0	1	0	0	0	0	0	0	0
1837	7.839245905	2	50	2	0	1	1	0	1	0	0	0	0	0	6.4516	0	1	0	0	0	0	0	0	0
1838	7.609926619	6	33	3	0	1	0	0	0	1	0	0	1	0	2.1316	0	0.666666667	0	0	0	0	0	0	0
1839	7.513534655	9	65	3	0	0	1	0	1	0	0	0	0	0	19.8916	0	0.555555556	0.111111111	0.111111111	0.111111111	0	0	0	0
1840	7.836346054	5	49	3	0	1	0	0	0	1	0	1	0	1	0.2116	0	0.8	0	0	0	0	0	0	0
1841	7.834325001	7	27	5	0	1	0	0	1	0	0	0	0	0	6.0516	0	0.714285714	0	0.142857143	0	0	0	0	0
1842	7.899632033	3	44	3	0	0	1	0	0	0	0	0	0	0	2.3716	0	0.333333333	0.333333333	0	0	0	0	0	0
1843	8.147488007	2	48	4	0	0	1	0	1	0	0	0	0	0	6.4516	0	1	0	0	0	0	0	0	0
1844	7.718289861	5	33	3	0	1	0	0	1	0	0	0	0	0	0.2116	0	0.4	0	0.2	0	0	0	0	0
1845	8.011580623	7	40	4	0	1	0	0	1	0	0	0	0	0	6.0516	0	0.428571429	0	0	0.142857143	0	0	0	0
1846	8.306420307	1	70	1	0	1	1	0	0	1	0	0	0	0	12.5316	0	0	1	0	0	0	0	0	0
1847	7.965083661	3	30	2	0	1	0	0	1	0	0	0	0	0	2.3716	0	0.666666667	0	0	0	0	0	0	0
1848	7.716857158	3	28	4	0	0	0	0	1	0	0	0	0	1	2.3716	0	0.333333333	0	0.333333333	0	0	0	0	0
1849	7.663332509	6	36	4	0	1	0	0	1	0	0	0	1	0	2.1316	0	0.666666667	0	0.166666667	0	0	0.166666667	0	0
1850	8.212232025	2	26	3	0	1	0	0	1	0	0	0	0	0	6.4516	0	1	0	0	0	0	0	0	0
1851	7.738047938	6	45	3	0	1	0	0	1	0	0	0	0	0	2.1316	0	0.833333333	0	0	0	0.166666667	0.166666667	0	0
1852	7.890881891	5	70	4	0	0	0	0	1	0	0	0	0	0	0.2116	0	0.8	0.2	0	0	0	0.2	0	0
1853	8.23926077	6	70	3	0	1	0	0	1	0	0	0	0	0	2.1316	0	0.5	0.166666667	0	0	0	0	0	0
1854	7.756383682	4	22	2	0	1	0	0	1	0	0	0	0	0	0.2916	0	0.5	0.25	0.25	0	0	0	0	0
1855	7.956070268	9	66	6	0	0	0	0	1	0	0	0	0	0	19.8916	0	0.444444444	0.111111111	0.222222222	0	0.111111111	0	0	0
1856	7.519296447	9	50	2	0	1	0	0	1	0	0	0	1	0	19.8916	0	0.555555556	0	0	0.111111111	0	0.222222222	0	0
1857	7.775947607	7	48	5	0	1	0	0	1	0	0	0	1	0	6.0516	0	0.285714286	0.142857143	0.142857143	0	0.142857143	0	0	0
1858	7.687350761	7	45	5	0	1	0	0	1	0	0	1	1	0	6.0516	0	0.428571429	0	0	0	0.142857143	0	0	0
1859	8.201407897	2	18	2	0	1	0	0	1	0	0	0	1	0	6.4516	0	0.5	0.5	0	0	0	0	0	0
1860	8.203356037	6	45	4	0	1	0	0	1	0	0	0	0	0	2.1316	0	0.666666667	0	0	0	0.166666667	0	0	0
1861	7.819696566	4	43	3	0	1	0	0	1	0	1	0	0	1	0.2916	0	0.5	0.25	0	0	0	0	0	0
1862	8.549245968	3	70	4	0	1	0	0	0	1	1	0	0	1	2.3716	0	0.666666667	0.333333333	0	0	0	0	0	0
1863	7.575517983	7	50	5	0	1	0	0	0	1	1	0	0	1	6.0516	0	0.857142857	0	0	0	0	0.142857143	0	0
1864	7.924166421	2	30	3	0	1	0	0	0	1	0	1	0	1	6.4516	0	1	0	0	0	0	0	0	0
1865	8.080933768	5	70	5	0	0	0	0	1	0	1	0	0	1	0.2116	0	0.4	0.4	0.2	0	0	0	0	0
1866	7.573433622	6	79	2	0	1	0	0	1	0	1	0	0	1	2.1316	0	0.333333333	0.333333333	0.166666667	0	0	0	0	0
1867	8.001622997	11	62	6	0	0	0	0	1	0	1	0	0	1	41.7316	0	0.636363636	0.181818182	0	0	0.090909091	0.090909091	0	0
1868	7.431465538	10	45	9	0	1	0	0	1	0	1	0	0	1	29.8116	0	0.5	0.1	0.1	0	0	0.1	0	0
1869	8.685143643	3	60	7	0	1	0	0	1	0	1	0	0	1	2.3716	0	0.666666667	0.333333333	0	0	0	0	0	0
1870	7.693686725	6	32	3	0	1	0	0	0	1	1	0	0	1	2.1316	0	0.5	0	0	0	0.166666667	0	0	0
1871	8.012097785	5	60	5	0	0	0	0	0	1	1	0	0	1	0.2116	0	0.6	0.2	0	0	0.2	0	0	0
1872	7.889807534	6	52	6	0	1	0	0	0	1	1	0	0	1	2.1316	0	0.5	0.166666667	0	0	0.333333333	0	0	0
1873	8.070477872	2	80	5	0	0	1	0	1	0	1	0	0	1	6.4516	0	0.5	0.5	0	0	0	0	0	0
1874	7.962394781	3	55	3	0	0	1	0	0	1	1	0	0	1	2.3716	0	1	0	0	0	0	0	0	0
1875	7.827388419	4	24	3	0	1	0	0	1	0	0	1	0	1	0.2916	0	1	0	0	0	0	0	0	0
1876	8.03689354	6	45	7	0	1	0	0	0	1	1	0	0	1	2.1316	0	0.333333333	0.166666667	0.166666667	0	0.166666667	0.166666667	0	0
1877	7.429651398	11	45	5	0	1	0	0	1	0	1	0	0	1	41.7316	0	0.818181818	0	0.090909091	0	0.181818182	0	0	0
1878	7.980878805	4	50	4	0	0	1	0	1	0	1	0	0	1	0.2916	0	0.75	0	0	0	0	0	0	0
1879	8.01287634	4	40	2	0	1	0	0	0	1	1	0	0	1	0.2916	0	0.75	0	0.25	0	0	0	0	0
1880	7.914993963	3	29	3	0	1	0	0	0	1	0	1	0	1	2.3716	0	0.666666667	0	0.333333333	0	0	0	0	0
1881	7.970021652	4	42	3	0	1	1	0	0	1	0	1	0	1	0.2916	0	1	0	0	0	0	0	0	0
1882	7.858466761	5	60	3	0	0	0	0	0	1	0	1	0	0	0.2116	0	0.6	0.2	0	0.2	0	0	0	0
1883	7.87998012	5	50	5	0	1	0	0	0	1	0	1	0	0	0.2116	0	0.4	0.2	0	0	0	0	0	0
1884	7.386415085	5	38	4	0	1	0	0	1	0	1	0	0	1	0.2116	0	0.4	0.2	0.2	0	0	0	0	0
1885	7.770138777	5	50	2	0	1	0	0	0	1	1	0	0	1	0.2116	0	0.6	0	0	0	0	0.2	0	0
1886	7.565492875	4	35	4	0	1	0	0	0	1	1	0	0	1	0.2916	0	0.5	0	0	0	0	0	0	0
1887	7.962537581	4	30	2	0	1	0	0	0	1	0	0	1	0	0.2916	0	0.5	0.25	0	0.25	0	0	0	0
1888	7.517526285	5	35	2	0	1	0	0	1	0	1	0	0	1	0.2116	0	0.4	0	0.2	0	0	0.2	0	0
1889	7.758175403	3	38	1	0	1	0	0	0	1	1	0	0	1	2.3716	0	0.666666667	0	0	0	0	0	0	0
1890	7.738684182	5	45	4	0	0	0	0	1	0	1	0	0	0	0.2116	0	0.8	0	0.2	0	0	0	0	0
1891	7.740373055	5	45	3	0	1	0	0	1	0	0	0	0	0	0.2116	0	0.8	0	0	0	0	0.2	0	0
1892	7.824737772	5	42	1	0	1	0	0	1	0	0	0	0	0	0.2116	0	0.4	0	0.2	0	0	0.2	0	0
1893	7.962530616	4	42	2	0	1	0	0	0	1	0	0	0	0	0.2916	0	0.5	0	0	0	0.25	0	0	0
1894	7.908405541	6	40	2	0	1	0	0	0	1	0	1	0	1	2.1316	0	0.333333333	0.166666667	0	0	0.166666667	0	0	0
1895	8.04764066	4	48	3	0	1	0	0	1	0	1	0	0	1	0.2916	0	1	0	0	0	0	0	0	0
1896	8.02639566	8	40	4	0	1	0	0	1	0	1	0	0	1	11.9716	0	0.625	0.125	0.125	0	0	0	0	0
1897	7.752279296	5	52	3	0	1	0	0	0	1	0	1	0	1	0.2116	0	1	0	0	0	0	0	0	0
1898	7.770784465	5	45	3	0	1	0	0	0	1	0	0	0	1	0.2116	0	0.6	0	0	0	0	0.2	0	0
1899	7.906488299	4	48	2	0	1	0	0	0	1	0	1	0	0	0.2916	0	0.75	0	0	0	0.25	0	0	0
1900	7.831978466	6	37	3	0	1	0	0	0	1	1	0	0	1	2.1316	0	0.5	0.333333333	0	0	0.166666667	0	0	0
1901	7.651196255	5	45	4	0	0	0	0	0	1	1	0	0	0	0.2116	0	0.4	0	0	0	0.2	0	0	0
1902	8.061594117	4	55	4	0	1	0	0	0	1	1	0	0	1	0.2916	0	1	0	0	0	0	0	0	0
1903	7.854171643	5	45	3	0	1	0	0	0	1	1	0	0	1	0.2116	0	0.6	0	0	0	0.2	0.2	0	0
1904	7.727561542	4	38	3	0	1	0	0	0	1	1	0	0	1	0.2916	0	0.5	0	0	0	0	0	0	0
1905	7.799146577	4	35	3	0	1	0	0	0	1	1	0	0	1	0.2916	0	0.5	0.25	0	0	0.25	0	0	0
1906	7.865498846	3	39	2	0	1	0	0	0	1	1	0	0	1	2.3716	0	0.666666667	0	0	0.333333333	0	0	0	0
1907	7.700037135	5	33	3	0	1	0	0	0	1	0	1	0	1	0.2116	0	0.4	0	0.4	0	0	0	0	0
1908	7.6129496	4	30	3	0	1	0	0	0	1	1	0	0	1	0.2916	0	0.5	0	0.25	0	0	0	0	0
1909	7.970032022	2	27	2	0	0	0	0	1	0	1	0	0	1	6.4516	0	0.5	0	0	0	0	0	0	0
1910	7.645330744	6	50	3	0	1	0	0	0	1	1	0	0	1	2.1316	0	0.666666667	0	0	0	0	0.166666667	0	0
1911	7.90320094	3	55	4	0	1	0	0	0	1	1	0	0	1	2.3716	0	1	0	0	0	0	0	0	0
1912	8.162963826	2	60	6	0	1	0	0	0	1	1	0	0	1	6.4516	0	0.5	0.5	0	0	0	0	0	0
1913	7.541237377	6	45	4	0	1	0	0	0	1	1	0	0	1	2.1316	0	0.333333333	0	0	0	0.333333333	0	0	0
1914	8.075007043	3	52	6	0	1	0	0	0	1	1	0	0	1	2.3716	0	1	0	0	0	0	0	0	0
1915	7.667219086	5	47	2	0	1	0	0	1	0	0	1	0	1	0.2116	0	0.6	0.2	0	0	0	0.2	0	0
1916	7.936881718	4	30	3	0	1	0	0	0	1	0	1	0	1	0.2916	0	0.5	0	0.25	0	0	0	0	0
1917	7.519871347	6	45	3	0	1	0	0	0	1	0	1	0	0	2.1316	0	0.833333333	0	0.166666667	0	0	0	0	0
1918	8.075710156	5	45	4	0	1	0	0	1	0	1	0	0	1	0.2116	0	0.4	0	0.2	0	0.2	0	0	0
1919	7.858857016	5	24	5	0	1	0	0	0	1	1	0	0	1	0.2116	0	1	0	0	0	0	0	0	0
1920	8.341190826	3	48	4	0	1	0	0	0	1	1	0	0	1	2.3716	0	0.666666667	0	0	0	0	0	0	0
1921	7.409366581	5	32	2	0	1	0	0	1	0	0	0	1	0	0.2116	0	0.4	0	0	0.2	0	0	0	0
1922	7.710285872	4	35	1	0	1	0	0	1	0	0	0	1	0	0.2916	0	0.5	0	0	0	0	0	0	0
1923	7.720949597	6	38	4	0	1	0	0	1	0	0	0	0	1	2.1316	0	0.333333333	0.166666667	0.166666667	0	0.166666667	0	0	0
1924	7.724066547	5	31	2	0	1	0	0	0	1	0	0	0	1	0.2116	0	0.6	0.2	0.2	0	0	0	0	0
1925	7.931349438	7	65	7	0	0	0	0	1	0	0	0	0	1	6.0516	0	0.857142857	0.142857143	0	0	0	0	0	0
1926	7.88325787	10	50	4	0	1	0	0	1	0	0	0	0	1	29.8116	0	0.7	0.1	0.1	0	0	0	0	0
1927	7.443804106	8	47	3	0	1	0	0	1	0	0	0	0	1	11.9716	0	0.375	0.125	0.125	0	0.125	0	0	0
1928	7.727817009	6	60	4	0	0	1	0	1	0	0	0	0	0	2.1316	0	0.666666667	0.166666667	0.166666667	0	0	0	0	0
1929	7.726975483	4	36	2	0	1	0	0	0	1	0	0	0	0	0.2916	0	0.5	0	0	0	0	0	0	0
1930	7.823073538	4	28	4	0	1	0	0	1	0	1	0	1	0	0.2916	0	0.5	0.25	0.25	0	0	0	0	0
1931	7.984656921	2	46	3	0	0	1	0	1	0	0	0	0	0	6.4516	0	1	0	0	0	0	0	0	0
1932	7.708626181	5	58	4	0	1	0	0	1	0	0	0	0	1	0.2116	0	1	0	0	0	0	0	0	0
1933	7.699964683	3	62	2	0	0	0	0	1	0	0	0	0	1	2.3716	0	0.333333333	0.666666667	0	0	0	0	0	0
1934	7.594698253	6	55	5	0	0	0	0	1	0	0	0	0	0	2.1316	0	1	0	0	0	0	0	0	0
1935	7.447809553	7	65	4	0	0	0	0	1	0	0	0	0	0	6.0516	0	0.571428571	0.142857143	0.142857143	0.142857143	0	0	0	0
1936	7.725983246	5	53	3	0	1	0	0	1	0	0	0	0	1	0.2116	0	0.6	0	0	0	0.2	0.4	0	0
1937	7.626399626	4	52	2	0	0	0	0	1	0	0	0	0	0	0.2916	0	0.75	0	0	0	0	0	0	0
1938	8.055065664	2	50	2	0	0	0	0	1	0	0	0	1	0	6.4516	0	1	0	0	0	0	0	0	0
1939	7.991632877	6	70	3	0	1	0	0	1	0	0	0	0	0	2.1316	0	0.833333333	0.166666667	0	0	0	0	0	0
1940	7.985188193	5	50	3	0	1	0	0	1	0	0	0	0	0	0.2116	0	0.6	0	0	0	0.2	0	0	0
1941	7.872954263	4	38	2	0	1	0	0	0	1	1	0	0	1	0.2916	0	0.5	0	0.25	0	0	0	0	0
1942	8.019912092	4	35	3	0	1	0	0	0	1	1	0	0	1	0.2916	0	0.5	0	0	0.25	0	0	0	0
1943	7.823857993	2	26	3	0	1	0	0	0	1	1	0	0	1	6.4516	0	1	0	0	0	0	0	0	0
1944	7.798248088	7	55	6	0	0	1	0	1	0	0	0	0	0	6.0516	0	0.714285714	0	0.142857143	0.142857143	0	0	0	0
1945	7.584351241	8	35	4	0	1	0	0	1	0	1	0	1	0	11.9716	0	0.625	0.125	0.125	0	0	0	0	0
1946	7.864611973	6	52	4	0	1	0	0	1	0	0	0	0	0	2.1316	0	0.5	0.166666667	0	0	0.166666667	0	0	0
1947	8.100398141	3	22	2	0	1	0	0	0	1	1	0	0	0	2.3716	0	0.666666667	0	0.333333333	0	0	0	0	0
1948	7.86601295	8	60	7	0	1	0	0	1	0	0	1	0	0	11.9716	0	0.5	0.125	0.25	0	0	0.125	0	0
1949	7.929691686	3	32	3	0	1	0	0	1	0	0	0	0	0	2.3716	0	0.666666667	0	0.333333333	0	0	0	0	0
1950	7.53292336	5	38	4	0	1	0	0	1	0	0	0	0	0	0.2116	0	0.4	0.4	0.2	0	0	0	0	0
1951	7.668944212	4	40	3	0	1	0	0	0	1	1	0	0	1	0.2916	0	0.5	0	0	0	0	0.25	0	0
1952	7.596276778	5	40	1	0	1	0	0	0	1	0	1	0	1	0.2116	0	0.4	0	0.2	0	0	0.2	0	0
1953	7.701964249	5	54	2	0	1	0	0	1	0	0	1	1	0	0.2116	0	1	0	0	0	0	0	0	0
1954	7.537728341	11	65	3	0	0	1	0	1	0	0	0	0	0	41.7316	0	0.545454545	0.090909091	0.181818182	0	0	0	0	0
1955	7.669658636	4	35	3	0	1	0	0	0	1	1	0	0	1	0.2916	0	0.5	0	0	0	0	0	0	0
1956	7.981480436	3	26	5	0	0	0	0	1	0	1	0	0	1	2.3716	0	0.333333333	0.333333333	0	0	0	0	0	0
1957	7.836693691	3	40	4	0	0	0	0	1	0	0	0	1	0	2.3716	0	1	0	0	0	0	0	0	0
1958	7.880278885	8	55	9	0	0	1	0	1	0	1	0	0	0	11.9716	0	0.75	0	0.125	0	0	0	0	0
1959	7.909871351	2	69	2	0	0	0	0	1	0	0	0	0	0	6.4516	0	0.5	0.5	0	0	0	0	0	0
1960	7.92906887	5	43	1	0	1	0	0	1	0	0	0	1	0	0.2116	0	0.8	0	0	0	0	0	0	0
1961	8.120707646	3	54	4	0	1	0	0	1	0	1	0	0	1	2.3716	0	1	0	0	0	0	0	0	0
1962	7.546330111	7	52	2	0	1	0	0	1	0	0	1	1	0	6.0516	0	0.714285714	0	0	0	0	0.285714286	0	0
1963	7.794489489	3	31	1	0	1	0	0	0	1	0	1	0	0	2.3716	0	0.666666667	0	0.333333333	0	0	0	0	0
1964	7.744179954	4	41	1	0	1	0	0	0	1	0	1	1	0	0.2916	0	0.5	0	0	0	0	0	0	0
1965	7.8326489	3	30	2	0	1	0	0	0	1	0	1	0	0	2.3716	0	0.666666667	0	0.333333333	0	0	0	0	0
1966	7.902087949	2	35	1	0	1	0	1	0	1	0	0	0	0	6.4516	0	0.5	0	0	0	0.5	0	0	0
1967	7.630101974	2	30	3	0	1	0	0	1	0	0	1	0	1	6.4516	0	1	0	0	0	0	0	0	0
1968	7.908070933	5	39	2	0	1	0	0	0	1	0	0	0	0	0.2116	0	0.6	0	0	0	0	0.2	0	0
1969	7.809167878	4	50	2	0	1	0	0	1	0	0	0	1	0	0.2916	0	0.75	0	0	0	0	0.25	0	0
1970	8.024312261	4	44	2	0	1	0	0	1	0	0	0	0	0	0.2916	0	0.5	0	0	0	0.25	0	0	0
1971	7.658543812	6	37	2	0	1	0	0	1	0	0	0	0	0	2.1316	0	0.666666667	0.166666667	0	0	0	0	0	0
1972	7.940804522	8	65	4	0	0	0	0	1	0	0	1	0	0	11.9716	0	0.625	0.25	0.125	0	0	0	0	0
1973	7.693937326	11	75	4	0	0	0	0	1	0	0	1	1	0	41.7316	0	0.727272727	0.181818182	0	0	0	0.090909091	0	0
1974	7.659840955	3	24	1	0	1	0	0	0	1	0	0	0	0	2.3716	0	0.666666667	0	0.333333333	0	0	0	0	0
1975	7.713181487	2	22	1	0	1	0	0	0	1	0	0	0	1	6.4516	0	1	0	0	0	0	0	0	0
1976	7.947622013	4	32	2	0	1	0	0	0	1	1	0	0	1	0.2916	0	0.75	0	0	0	0	0.25	0	0
1977	7.614825088	5	35	3	0	1	0	0	1	0	0	1	0	1	0.2116	0	0.4	0.2	0	0	0	0	0	0
1978	7.801194902	6	44	3	0	1	0	0	1	0	0	0	1	0	2.1316	0	0.5	0	0	0	0.166666667	0	0	0
1979	7.737834314	5	49	2	0	1	0	0	1	0	0	0	0	0	0.2116	0	0.6	0	0	0	0	0.4	0	0
1980	7.748235667	10	48	5	0	1	0	0	1	0	0	0	1	0	29.8116	0	0.6	0	0	0.1	0	0	0	0
1981	7.335125378	4	37	2	1	0	0	0	1	0	0	0	0	0	0.2916	4	0.5	0	0	0	0	0	0	0
1982	8.089865836	4	45	2	1	1	0	0	1	0	0	0	0	0	0.2916	4	0.75	0	0	0	0	0.5	0	0
1983	7.292874812	4	26	4	1	0	0	0	1	0	1	0	0	1	0.2916	4	0.25	0.25	0.25	0	0	0	0	0
1984	7.461864505	8	35	2	1	0	0	0	1	0	0	0	0	0	11.9716	8	0.375	0.125	0.125	0	0.125	0	0	0
1985	7.340932826	7	62	3	1	1	0	0	1	0	0	0	0	0	6.0516	7	0.571428571	0.142857143	0	0.142857143	0	0.142857143	0	0
1986	7.510310133	6	35	3	1	1	0	0	1	0	0	0	0	0	2.1316	6	0.333333333	0	0.166666667	0.166666667	0	0	0	0
1987	7.408063791	2	75	2	1	1	0	0	1	0	0	0	0	0	6.4516	2	0	1	0	0	0	0	0	0
1988	7.169919523	8	44	3	1	1	0	0	0	1	0	0	0	0	11.9716	8	0.375	0	0.25	0	0.125	0	0	0
1989	8.157785947	2	54	2	1	1	0	0	1	0	0	1	0	1	6.4516	2	1	0	0	0	0	0	0	0
1990	7.471636244	7	56	2	1	1	0	0	1	0	0	0	0	0	6.0516	7	0.571428571	0	0	0	0.142857143	0	0	0
1991	8.069530143	11	70	5	1	1	0	0	1	0	0	0	0	0	41.7316	11	0.545454545	0.181818182	0.090909091	0	0	0	0	0
1992	7.447069229	4	55	2	1	0	0	0	1	0	0	0	0	0	0.2916	4	0.75	0.25	0	0	0	0	0	0
1993	7.779981264	7	50	4	1	1	0	0	1	0	0	0	0	0	6.0516	7	0.714285714	0	0.142857143	0	0	0.142857143	0	0
1994	7.187967018	10	48	4	1	1	0	0	1	0	0	0	0	0	29.8116	10	0.4	0	0.2	0	0	0.1	0	0
1995	7.842180581	6	39	3	1	1	0	0	1	0	0	0	0	1	2.1316	6	0.5	0.333333333	0	0	0.166666667	0.166666667	0	0
1996	7.530490725	4	54	3	1	1	0	0	1	0	0	0	0	0	0.2916	4	0.75	0	0	0	0.25	0	0	0
1997	7.840053209	2	37	2	1	0	1	0	1	0	0	0	0	0	6.4516	2	1	0	0	0	0	0	0	0
1998	7.896902343	3	30	2	1	1	0	0	1	0	0	0	0	0	2.3716	3	0.666666667	0.333333333	0	0	0	0	0	0
1999	7.406127682	4	30	3	1	0	0	0	1	0	0	0	0	1	0.2916	4	0.25	0	0.25	0	0	0	0	0
[truncated: 10,241 more rows]
